# Supplementary material for: Integrated Analysis of Physiological, mRNA Sequencing, and miRNA Sequencing Data Reveals a Specific Mechanism for the Response to Continuous Cropping Obstacles in Pogostemon cablin Roots
Source: Front Plant Sci. 2022 Apr 1;13:853110. doi: 10.3389/fpls.2022.853110 (PMC9010791; doi:10.3389/fpls.2022.853110)
Supplement: Supplementary file 2 [file Data_Sheet_2.xlsx]

## Sheet: Table S1
Supplementary Table 1. Gene IDs and primer sequences for the genes used for qPCR verification.
Gene Id	Forward Primer	Reverse Primer
MSTRG.65271.1	F:TAAGCCCAAGCAGATGAACC	R:CCTCCCACTACTAATCTAACG
MSTRG.83325.1	F:TCTTCTGCCCTTGCTGCTCT	R:AGGAGGCGTCTTCATCATCT
MSTRG.45166.2	F:GCCACCACCAAAGCAGGAT	R:CCAAGCAGTATCGCCTCA
MSTRG.50572.2	F:CAGGAAGGGATGTGCTATT	R:AAGGAGGCGTTGAGGTAG
MSTRG.97625.2	F:AAACAAGTGGGCTCGGATGG	R:GTGGTAAACCCGCACGCTGA
MSTRG.87284.1	F:CAATGCCACAAACTAAGGAG	R:CAGCAGTTCTGGGTCATCTA
MSTRG.46448.2	F:GGAGGTCATAATGCTGC	R:CAACCTTCTCATAGTCCC
MSTRG.111696.3	F:TGCGGCTCCAAGTTCACCCTA	R:ATTTGCTCGCTACCACCTCC
MSTRG.4629.1	F:AGGTTGACGAAGGAGCACTA	R:GGAGATGGCGTAAGAAGAAG
MSTRG.56394.1	F:AACGGTCACTTCTCAAACG	R:GACTTCCTGAACTCCTCCAC
MSTRG.11718.1	F:TACTCTGCCTGGAGGTGAAG	R:CGACGGCAAAGAAGAACACT
MSTRG.112730.5	F:CGGTCTCCCATTCTCCAC	R:TCGGCATTATCACCCAAC
MSTRG.120707.4	F:TGGAGTTGAGGTGGAGCG	R:CGAACAGATGAGCCGACA
MSTRG.11485.1	F:CAAAGGCGGAAAGACGAA	R:GGCTCGGTGGAGGTGAAT
MSTRG.14939.4	F:GAATACGAACCGTGAAAG	R:CACAATGATAGGAAGAGCC
MSTRG.17647.1	F:GCCATCATCAAGCAACG	R:CTCCAATCAGCAACCCT
MSTRG.49941.2	F:CTCTTGAGAAGCACCACATT	R:TAGCAGGTTTGTTCACCAGTCA
MSTRG.110280.1	F:TATGTCCCGATTGGTTAC	R:TCTGAAGGCTGTCTGGTT
MSTRG.102011.1	F:CACAAACACGGCAAACCAAT	R:ACGAGGGAGTGAGGCAGTAA
MSTRG.102880.1	F:AAAAGAAAGCCAGACAGAG	R:GAGTAGCCACCAAAGGAAG
MSTRG.83027.3	F:GGTGTCGGATGTGAGAGAGGT	R:AGATGTGGACTGGGAAGCAAG
MSTRG.38549.4	F:GTTTCGTGGAGTTGATGCTGA	R:GCTTTGGCGTCTAAGAATGTG
MSTRG.90185.1	F:AACAAGGATGAGGTGAGGTA	R:AACGACTGGCGAACATAGAT
18S rRNA	F:CCGACCATAAACGATGCCGACC	R:TTTCAGCTTTGCAACCATACTCC
ama-miR156	CTGACAGAAGAGAGTGAGCAC
ata-miR167f-5p	TGAAGCTGCCAGCATGATCTGC
fve-miR167d	TGAAGCTGCCAGCATGATCTCA
aly-miR172e-3p	GAATCTTGATGATGCTGCAT
osa-miR159f	CTTGGATTGAAGGGAGCTCTA
novel17_mature	TTGAGGTACAATAACTTGGGT
bdi-miR159a-3p	CTTGGATTGAAGGGAGCTCT
aly-miR166a-3p	TCGGACCAGGCTTCATTCCCC
ata-miR164a-5p	TGGAGAAGCAGGGCACGTGCT
novel17_star	CTGAGTTATTGTACCTTAAAT
novel5_mature	TATTTCTGAAGGTTCTGTGATGATA
cas-miR403	TTAGATTCACGCACAAACTCGT
gma-miR172k	TGAATCTTGATGATGCTGCAT
U6 snRNA	CCGATAAAATTGGAACGATACAG

## Sheet: Table S2
Supplementary Table 2. Summary of Illumina transcriptome sequencing data for patchouli roots under continuous cropping and noncontinuous cropping.
Sample	Raw Reads	Raw Bases	Clean Reads	Clean Bases	Valid Bases	Q30	GC
FP_S2_Root1	48.33M	7.25G	47.55M	6.77G	0.9332	0.9444	0.4566
FP_S2_Root2	47.75M	7.16G	46.97M	6.64G	0.9269	0.9462	0.4538
FP_S2_Root3	49.49M	7.42G	48.65M	6.85G	0.9229	0.9416	0.4534
FP_S3_Root1	48.18M	7.23G	47.27M	6.59G	0.9119	0.9424	0.4576
FP_S3_Root2	48.57M	7.29G	47.80M	6.74G	0.9247	0.9469	0.455
FP_S3_Root3	51.00M	7.65G	50.15M	7.07G	0.9239	0.9432	0.4564
FP_S4_Root1	49.42M	7.41G	48.43M	6.80G	0.9174	0.9418	0.4543
FP_S4_Root2	48.64M	7.30G	47.71M	6.62G	0.9067	0.9426	0.4558
FP_S4_Root3	49.14M	7.37G	48.31M	6.75G	0.9159	0.9416	0.453
SP_S2_Root1	47.25M	7.09G	46.36M	6.57G	0.9267	0.9433	0.453
SP_S2_Root2	48.62M	7.29G	47.73M	6.75G	0.9255	0.9397	0.456
SP_S2_Root3	51.05M	7.66G	50.08M	6.96G	0.9087	0.9397	0.456
SP_S3_Root1	50.02M	7.50G	49.22M	6.87G	0.9161	0.9451	0.4573
SP_S3_Root2	51.75M	7.76G	50.84M	7.17G	0.9236	0.9404	0.4582
SP_S3_Root3	51.56M	7.73G	50.58M	7.02G	0.9077	0.9415	0.4582
SP_S4_Root1	49.51M	7.43G	48.52M	6.69G	0.901	0.9389	0.4537
SP_S4_Root2	47.46M	7.12G	46.61M	6.42G	0.9015	0.9447	0.4537
SP_S4_Root3	49.86M	7.48G	49.05M	6.67G	0.8919	0.9498	0.4565
Total	839.27M	133.14G	871.83M	121.95G
Mean	49.31M	7.40G	48.44M	6.78G	0.9159	0.943	0.4555
Note: Q30 represents the percentage of the number of bases with Phred scores > 30 in the raw bases to the total number of bases.

## Sheet: Table S3
Supplementary Table 3. Summary of small RNA sequencing data for patchouli roots under continuous cropping and noncontinuous cropping.
Sample	Raw Reads	reads_trimmed_length	reads_trimmed_Q20	reads_trimmed_N	Clean Reads	Clean Reads_uniq
FP_S2_Root1	39.09M	29.81M	29.77M	29.70M	29.70M	10.45M
FP_S2_Root2	33.35M	27.56M	27.53M	27.45M	27.45M	8.81M
FP_S2_Root3	35.78M	29.57M	29.54M	29.47M	29.47M	10.96M
FP_S3_Root1	33.01M	27.96M	27.94M	27.88M	27.88M	10.93M
FP_S3_Root2	35.38M	28.92M	28.89M	28.81M	28.81M	9.86M
FP_S3_Root3	37.25M	30.05M	30.02M	29.97M	29.97M	10.01M
FP_S4_Root1	35.04M	30.99M	30.95M	30.87M	30.87M	10.66M
FP_S4_Root2	32.72M	27.01M	26.99M	26.97M	26.97M	9.05M
FP_S4_Root3	22.41M	19.61M	19.59M	19.57M	19.57M	7.32M
SP_S2_Root1	35.81M	30.55M	30.51M	30.38M	30.38M	10.60M
SP_S2_Root2	35.30M	28.84M	28.80M	28.80M	28.80M	9.46M
SP_S2_Root3	33.57M	27.08M	27.04M	27.04M	27.04M	8.82M
SP_S3_Root1	33.26M	29.56M	29.53M	29.53M	29.53M	11.35M
SP_S3_Root2	37.93M	32.85M	32.80M	32.79M	32.79M	12.04M
SP_S3_Root3	36.46M	31.71M	31.67M	31.66M	31.66M	11.82M
SP_S4_Root1	32.43M	29.05M	29.02M	29.01M	29.01M	10.10M
SP_S4_Root2	32.53M	29.40M	29.36M	29.36M	29.36M	9.55M
SP_S4_Root3	33.78M	30.41M	30.37M	30.37M	30.37M	10.19M
Total	615.1M	520.93M	520.32M	519.63M	519.63M	181.98M
Mean	34.17M	28.94M	28.91M	28.87M	28.87M	10.11M

## Sheet: Table S4
Supplementary Table 4. The profiled miRNAs identified in three growth periods of patchouli roots under continuous cropping and noncontinuous cropping.
miRNA_id	TPM																		Sequence (5'-3')	Length
	FP_S2_Root1	FP_S2_Root2	FP_S2_Root3	FP_S3_Root1	FP_S3_Root2	FP_S3_Root3	FP_S4_Root1	FP_S4_Root2	FP_S4_Root3	SP_S2_Root1	SP_S2_Root2	SP_S2_Root3	SP_S3_Root1	SP_S3_Root2	SP_S3_Root3	SP_S4_Root1	SP_S4_Root2	SP_S4_Root3
aau-miR160	0	0.0364258	0	0	0	0	0	0	0	0	0	0	0	0	0	0	0	0	TGGCATACAGGGAGCCAGGCA	21
aau-miR162>aly-miR162a-3p>aly-miR162b-3p>ath-miR162a-3p>ath-miR162b-3p>bra-miR162-3p>cme-miR162>cpa-miR162a>csi-miR162-3p>eun-miR162-3p>fve-miR162-3p>ghr-miR162a>gma-miR162b>gma-miR162c>hpe-miR162a>htu-miR162a>lus-miR162a>lus-miR162b>mdm-miR162a>mdm-miR162b>mes-miR162>mtr-miR162>nta-miR162a>nta-miR162b>osa-miR162a>pde-miR162>ppe-miR162>ptc-miR162a>ptc-miR162b>rco-miR162>sbi-miR162>sly-miR162>stu-…	0	0	0	0	0	0	0	0	0	0	0	0	0.135467	0.0304943	0.0315835	0	0	0.0329298	TCGATAAACCTCTGCATCCAG	21
aau-miR168	0.0336732	0	0.0339315	0	0	0	0	0	0	0.0329179	0.0694396	0.0369882	0.0677337	0.0609886	0	0	0.0340624	0	ATTCAGTTGATGCAAGGCGGGATC	24
aau-miR172>vvi-miR172d	6.73463	5.39102	0.169658	10.1869	8.12348	10.7764	0.907098	0.0741536	6.89908	4.64142	0.277759	3.36593	0	12.1367	12.8545	4.10157	2.6228	2.17337	TGAGAATCTTGATGATGCTGCAT	23
aau-miR319>aly-miR319a-3p>aly-miR319b-3p>amg-miR319>aof-miR319a>aqc-miR319>ath-miR319a>ath-miR319b>bra-miR319-3p>cca-miR319>gma-miR319h>gma-miR319j>gma-miR319k>gma-miR319m>hbr-miR319>lus-miR319a>mdm-miR319a>mdm-miR319b-3p>mes-miR319a>mes-miR319b>mes-miR319c>mes-miR319d>mes-miR319e>mtr-miR319d-3p>nta-miR319a>nta-miR319b>rco-miR319a>rco-miR319b>rco-miR319c>sly-miR319b>stu-miR319a-3p>tae-miR319>vun-…	203.992	3.09619	94.5672	178.63	9.96341	212.825	5.96093	89.2068	9.60761	126.635	7.81196	8.87717	3.65762	5.09255	9.28556	7.99633	21.1868	7.34334	TTGGACTGAAGGGAGCTCCCT	21
aau-miR396>aly-miR396a-5p>amg-miR396>aof-miR396b>aqc-miR396a>ata-miR396e-5p>ath-miR396a-5p>bcy-miR396a>bdi-miR396d-5p>bdi-miR396c-5p>bgy-miR396a>cas-miR396a>cme-miR396b>cpa-miR396>csi-miR396a-5p>csi-miR396b-5p>dpr-miR396>eun-miR396b-5p>fve-miR396a-5p>fve-miR396c-5p>fve-miR396d>ghr-miR396a>ghr-miR396b>gma-miR396a-5p>gma-miR396i-5p>hbr-miR396b>lja-miR396>lus-miR396a>lus-miR396c>mdm-miR396b>mes-miR3…	52.6648	96.9655	63.2823	1.04021	114.701	186.701	176.236	145.564	0.102209	59.3838	0.0694396	55.4823	124.698	107.218	178.068	16.3718	46.2227	12.678	TTCCACAGCTTTCTTGAACTG	21
ahy-miR156a>aof-miR156c>ath-miR156j>bdi-miR156j>cas-miR156j>hpa-miR156a	0.0336732	0	0	0	0	0	0.0647927	0	0	0.0329179	0.104159	0	0.0338668	0	0	0	0	0	TGACAGAAGAGAGAGAGCAC	20
ahy-miR156b-5p>aly-miR157a-5p>aly-miR157b-5p>aly-miR157c-5p>aof-miR156b>ath-miR157a-5p>ath-miR157b-5p>ath-miR157c-5p>atr-miR156a>atr-miR156c>bna-miR156b>bna-miR156c>bna-miR156g>bol-miR157a>bra-miR157a>cca-miR156c>cme-miR156b>cpa-miR156e>cpa-miR156f>fve-miR156f>fve-miR156g-5p>gma-miR156d>gma-miR156c>gma-miR156i>gma-miR156j>gma-miR156l>gma-miR156m>gra-miR157a>gra-miR157b>han-miR156c>lus-miR156b>lus…	2.12141	2.36768	0.0339315	1.68587	0.937325	2.40216	2.20295	1.48307	2.04417	0.954618	1.63183	2.21929	0.812804	1.40274	1.32651	3.9637	0.13625	0.724455	TTGACAGAAGATAGAGAGCAC	21
ahy-miR156c>far-miR156b>mdm-miR156t>mdm-miR156u>mdm-miR156v>mdm-miR156w>mes-miR156k	0.202039	0.509961	0.101795	0.0717389	0.451304	0.40036	0.680324	0.444922	0.0511043	0.0987536	0	0.517835	0.304802	0.762357	0.0947506	0.34467	0.170312	0.461017	TTGACAGAAGAGAGAGAGCAC	21
ahy-miR159>aly-miR159a-3p>aof-miR159>ath-miR159a>atr-miR159>bna-miR159>bra-miR159a>cme-miR159a>cpa-miR159a>csi-miR159a-3p>fve-miR159a-3p>gma-miR159a-3p>gma-miR159e-3p>hbr-miR159a>htu-miR159a>mdm-miR159d>mdm-miR159e>mdm-miR159f>mes-miR159a-3p>mes-miR159b>mtr-miR159a>nta-miR159>ppe-miR159>ptc-miR159a>ptc-miR159b>pvu-miR159a.1>rco-miR159>sly-miR159>vca-miR159-3p>vvi-miR159c	1463.5	695.478	737.638	1528.79	1219.53	724.152	1006.85	546.697	906.233	989.149	700.542	1102.73	875.525	669.35	490.556	462.34	548.03	560.531	TTTGGATTGAAGGGAGCTCTA	21
ahy-miR160-5p>aof-miR160a>bdi-miR160e-5p>cme-miR160d>cpa-miR160d>mes-miR160f>mtr-miR160c>osa-miR160f-5p>ptc-miR160e-5p>ptc-miR160f>rco-miR160c>sbi-miR160f>tcc-miR160a>vca-miR160-5p	0.101019	0.0364258	0	0	0	0	0	0	0	0.0658357	0.0347198	0	0.0338668	0.0304943	0	0	0	0.0329298	TGCCTGGCTCCCTGAATGCCA	21
ahy-miR167-5p>cme-miR167c>cpa-miR167c>csi-miR167b-5p>gma-miR167e>gma-miR167f>lus-miR167b>mes-miR167g>mes-miR167h>ptc-miR167f-5p>ptc-miR167g-5p>tcc-miR167c	11.5499	0	3.52888	2.47499	1.7705	1.83499	4.27632	2.85491	3.5262	0	0.173599	2.92207	1.99814	0	2.3056	3.4467	2.3503	2.86489	TGAAGCTGCCAGCATGATCTT	21
ahy-miR3508	0	0	0	0.0358695	0	0	0	0	0	0	0	0	0	0	0	0	0	0	TAGAGGGTCCCCATGTTCTCA	21
ahy-miR394>aly-miR394a-5p>aly-miR394b-5p>aof-miR394>ata-miR394-5p>ath-miR394a>ath-miR394b-5p>atr-miR394>bdi-miR394>bna-miR394a>bna-miR394b>cca-miR394>cme-miR394b>cme-miR394a>cpa-miR394a>cpa-miR394b>csi-miR394a>csi-miR394b-5p>fve-miR394>ghr-miR394b>ghr-miR394a>gma-miR394b-5p>gma-miR394a-5p>gma-miR394c-5p>gma-miR394d>gma-miR394e>gma-miR394f>gma-miR394g>lus-miR394a>lus-miR394b>mdm-miR394a>mdm-miR394…	0.0336732	0.910645	0.101795	0.358695	22.0792	0.0667267	0	0.222461	11.4474	0.592522	0	0	0.372535	0.335437	18.35	0	0	11.5254	TTGGCATTCTGTCCACCTCC	20
ahy-miR398>cas-miR398a-3p>cas-miR398b>lus-miR398b>lus-miR398c	0	0	0	0	0	0	0	0	0	0	0.0347198	0	0.203201	0	0	0	0	0	TGTGTTCTCAGGTCACCCCT	20
ahy-miR408-3p>aly-miR408-3p>ath-miR408-3p>cas-miR408>cme-miR408>csi-miR408-3p>gma-miR408a-3p>gma-miR408b-3p>gma-miR408c-3p>lus-miR408a>mdm-miR408a>mes-miR408>mtr-miR408-3p>pta-miR408>ptc-miR408-3p>vun-miR408>vvi-miR408	6.53259	6.15596	8.04178	3.58695	5.48508	6.77276	33.8218	61.8812	26.8809	5.06935	4.30526	4.58654	3.48828	6.00738	7.16947	16.2684	24.6612	24.4998	ATGCACTGCCTCTTCCCTGGC	21
aly-miR156a-5p>aly-miR156b-5p>aly-miR156c-5p>aly-miR156d-5p>aly-miR156e-5p>aly-miR156f-5p>aof-miR156a>ata-miR156d-5p>ata-miR156c-5p>ata-miR156a-5p>ata-miR156b-5p>ata-miR156e-5p>ath-miR156a-5p>ath-miR156b-5p>ath-miR156c-5p>ath-miR156d-5p>ath-miR156e>ath-miR156f-5p>atr-miR156b>atr-miR156d>bdi-miR156b-5p>bdi-miR156c>bdi-miR156d-5p>bdi-miR156e-5p>bdi-miR156f-5p>bdi-miR156g-5p>bdi-miR156h-5p>bdi-miR15…	0.0336732	1.34775	0.814357	0	24.7523	3.53652	0	3.48522	0.306626	4.67434	0.243039	0	4.36882	151.313	5.08495	0.551471	0	0	TGACAGAAGAGAGTGAGCAC	20
aly-miR156c-3p>ath-miR156c-3p>bra-miR156c-3p>bra-miR156g-3p>cas-miR156c-3p	0	0	0	0	0	0	0	0	0	0	0	0	0	0	0	0.034467	0	0	GCTCACTGCTCTATCTGTCAGA	22
aly-miR156e-3p>bra-miR156a-3p>cas-miR156e-3p	0	0	0	0.0358695	0	0	0	0	0	0	0.0347198	0	0	0	0.0315835	0	0	0	GCTTACTCTCTCTCTGTCACC	21
aly-miR156g-5p>ath-miR156g>smo-miR156a	1.11121	1.74844	0.373247	0.609781	0.72903	0.533814	0.71272	0.852767	0.664356	2.27133	0.381918	0.961693	0.575736	2.16509	0.663254	0.654872	0.919684	0.954964	CGACAGAAGAGAGTGAGCAC	20
aly-miR157a-3p>cas-miR157a	0	0	0.0339315	0	0	0	0	0	0	0	0	0	0.169334	0.152471	0.0315835	0.103401	0	0.230509	GCTCTCTAGCCTTCTGTCATCA	22
aly-miR157d-5p>aqc-miR156b>aqc-miR156a>ath-miR157d>cme-miR156f>fve-miR156i>mdm-miR156x>mdm-miR156y>mdm-miR156z>mdm-miR156aa>nta-miR156g>nta-miR156h>nta-miR156i>nta-miR156j>pab-miR156z>ppe-miR156f	0	0	0.0339315	0	0	0.0333634	0.226775	0.0370768	0	0.0329179	0.104159	0.110965	0.135467	0.0304943	0	0.0689339	0.13625	0	TGACAGAAGATAGAGAGCAC	20
aly-miR158a-3p>ath-miR158a-3p	0	0	0.0339315	0.0358695	0.104147	0.0333634	0	0.0370768	0	0	0	0	0.338668	0.0304943	0.252668	0.034467	0.0340624	0.0658596	TCCCAAATGTAGACAAAGCA	20
aly-miR158b-3p	0	0	0	0.0358695	0	0	0	0	0	0	0	0.0369882	0.64347	0.0914829	0.505337	0.0689339	0	0.0329298	TCCCAAATGTAGACAAAGC	19
aly-miR159b-3p>ath-miR159b-3p>cas-miR159c-3p>cas-miR159b-3p>lus-miR159c	18.5202	705.386	13.5387	19.1543	165.594	186.535	108.139	18.3901	7.1546	1096.92	174.78	14.3514	393.533	11.3439	12.4123	213.144	12.8075	5.92736	TTTGGATTGAAGGGAGCTCTT	21
aly-miR159c-3p>ath-miR159c>cas-miR159a	114.186	99.5153	130.942	176.263	97.8983	109.098	68.9071	64.699	58.4122	179.83	132.144	90.3622	63.8051	104.443	109.311	39.7749	40.977	49.5593	TTTGGATTGAAGGGAGCTCCT	21
aly-miR160a-3p>ath-miR160a-3p>bra-miR160a-3p>cpa-miR160c-3p>cpa-miR160f-3p>csi-miR160a-3p>ptc-miR160b-3p>ptc-miR160c-3p	0	0.109277	0.169658	0.0358695	0.138863	0.266907	0	0.0741536	0	0	0.0347198	0.0369882	0.0677337	0	0.0631671	0.103401	0.0681248	0	GCGTATGAGGAGCCATGCATA	21
aly-miR160a-5p>aly-miR160b-5p>aly-miR160c-5p>aof-miR160c>aqc-miR160b>ata-miR160b-5p>ata-miR160a-5p>ata-miR160c-5p>ath-miR160a-5p>ath-miR160b>ath-miR160c-5p>atr-miR160>bdi-miR160a-5p>bdi-miR160b-5p>bdi-miR160c-5p>bdi-miR160d-5p>bna-miR160a>bna-miR160b>bna-miR160c>bna-miR160d>bra-miR160a-5p>cca-miR160b>cme-miR160a>cme-miR160b>cme-miR160c>cpa-miR160a>cpa-miR160b>cpa-miR160c-5p>cpa-miR160e>cpa-miR160…	0.202039	2.73194	2.64666	1.04021	0.451304	2.80252	0.939495	4.70875	2.60632	1.54714	1.00687	2.33026	0.914405	1.18928	3.82161	2.58502	2.99749	3.32591	TGCCTGGCTCCCTGTATGCCA	21
aly-miR161-5p.1	0	0	0	0	0.0347157	0	0.0323964	0	0	0.0329179	0.0347198	0	0.372535	0.0609886	0.53692	0.0689339	0	0	TTGAAAGTGACTACATCGGGG	21
aly-miR163-5p.1	0	0	0	0	0	0	0	0	0	0.0658357	0	0	0	0	0	0	0	0	CGAGTTCCAGCCTCCTCAGA	20
aly-miR164a-3p	0.0336732	0	0	0	0	0.0333634	0	0	0	0	0	0	0	0	0	0	0	0	CACGTACTCCCCTTCTCCAAC	21
aly-miR164a-5p>aly-miR164b-5p>aof-miR164>ata-miR164b-5p>ata-miR164c-5p>ath-miR164a>ath-miR164b-5p>atr-miR164a>atr-miR164b>bdi-miR164b>bdi-miR164a-5p>bdi-miR164e>bna-miR164a>bra-miR164a>cas-miR164>cme-miR164c>cme-miR164d>cpa-miR164a>cpa-miR164b>cpa-miR164c>csi-miR164a-5p>csi-miR164b-5p>csi-miR164c-5p>csi-miR164d-5p>ctr-miR164>fve-miR164a-5p>fve-miR164b>ghr-miR164>gma-miR164a>gma-miR164e>gma-miR164…	173.551	0	0	222.176	278.316	0	128.905	370.064	0	35.3867	0.0347198	365.517	0.0338668	410.636	152.991	0	0.0681248	85.6175	TGGAGAAGCAGGGCACGTGCA	21
aly-miR164c-3p	0	0	0	0	0	0	0	0	0	0	0	0	0	0	0	0	0.0340624	0	CACGTGTTCTACTCCTCCAAC	21
aly-miR164c-5p>ath-miR164c-5p>bna-miR164b>bna-miR164c>bna-miR164d>bra-miR164b-5p>bra-miR164d-5p>bra-miR164c-5p>cln-miR164	245.174	25.7166	247.802	35.4749	40.9646	46.9423	14.222	24.2853	18.602	72.8802	41.6638	88.1799	224.165	22.8402	23.2771	17.6815	9.94622	9.54964	TGGAGAAGCAGGGCACGTGCG	21
aly-miR165a-3p>aly-miR165b-3p	0.909175	0.43711	7.19349	0.538042	7.04729	6.40577	3.14245	3.93014	2.96405	0.427932	0.520797	0.517835	1.86268	0.274449	3.18994	2.30929	2.38437	0.230509	TCGGACCAGGCTTCATCCCC	20
aly-miR166a-3p>aly-miR166b-3p>aly-miR166c-3p>aly-miR166d-3p>aly-miR166e-3p>aly-miR166f-3p>aly-miR166g-3p>aly-miR166h-3p>aof-miR166d>aqc-miR166e>aqc-miR166b>ata-miR166a-3p>ata-miR166e-3p>ata-miR166b-3p>ata-miR166d-3p>ath-miR166a-3p>ath-miR166b-3p>ath-miR166c>ath-miR166d>ath-miR166e-3p>ath-miR166f>ath-miR166g>atr-miR166a>atr-miR166c>atr-miR166d>bdi-miR166a-3p>bdi-miR166d-3p>bdi-miR166b-3p>bdi-miR16…	43.7751	0	11.876	0.322825	0	0	0	0	25.2455	45.0316	0.277759	0	515.148	0	721.337	0	0.749372	0	TCGGACCAGGCTTCATTCCCC	21
aly-miR166a-5p>aly-miR166c-5p>aly-miR166d-5p>bdi-miR166e-5p>cas-miR166a>csi-miR166e-5p>csi-miR166a-5p>eun-miR166-5p>gma-miR166a-5p>gma-miR166c-5p>gma-miR166l>mtr-miR166g-5p>osa-miR166d-5p>stu-miR166a-5p>vca-miR166b-5p>zma-miR166c-5p	196.786	168.87	233.008	137.954	126.261	155.673	201.829	197.582	177.23	200.634	162.697	178.32	125.002	161.65	138.999	275.563	282.82	270.946	GGAATGTTGTCTGGCTCGAGG	21
aly-miR166b-5p>ath-miR166a-5p>ath-miR166b-5p>cas-miR166b	0.303058	0.0728516	0.0678631	0.0358695	0.0347157	0.0667267	0.0323964	0.148307	0.153313	0.0658357	0.0347198	0.110965	0.0677337	0	0.0947506	0.103401	0.238437	0	GGACTGTTGTCTGGCTCGAGG	21
aly-miR166e-5p>ath-miR166e-5p>cas-miR166c-5p	0.538771	0.43711	0.271452	0.179347	0.138863	0.20018	0.194378	0.11123	0.153313	0.296261	0.173599	0.443858	0.135467	0.365931	0.315835	0.310203	0.204374	0.230509	GGAATGTTGTCTGGCACGAGG	21
aly-miR166f-5p>aly-miR166h-5p	0	0	0	0	0	0	0	0	0	0	0	0	0	0	0	0	0.0681248	0	TGAATGATGCCTGGCTCGAGA	21
aly-miR166g-5p>cas-miR166f-5p>gma-miR166h-5p>gma-miR166j-5p>stu-miR166c-5p	0.269385	0	0.305384	0.143478	0.0347157	0	0.129585	0	0	0.230425	0.173599	0.40687	0.135467	0.0304943	0	0.206802	0	0.0658596	GGAATGTTGTTTGGCTCGAGG	21
aly-miR167a-3p>ath-miR167a-3p>cas-miR167a	0	0	0	0.0358695	0.0347157	0	0	0	0	0	0.0347198	0	0	0	0	0	0	0	GATCATGTTCGCAGTTTCACC	21
aly-miR167a-5p>aly-miR167b-5p>aof-miR167a>ata-miR167c-5p>ata-miR167a-5p>ata-miR167e-5p>ath-miR167a-5p>ath-miR167b>bdi-miR167a>bdi-miR167b>bdi-miR167f>bna-miR167c>bra-miR167a>bra-miR167b>bra-miR167c>bra-miR167d>cme-miR167a>cme-miR167b>cpa-miR167a>cpa-miR167b>csi-miR167d-5p>csi-miR167e-5p>dpr-miR167a>dpr-miR167b>ghr-miR167a>ghr-miR167b>gma-miR167a>gma-miR167b>gma-miR167d>lus-miR167c>lus-miR167d>lus…	23.2008	0	0.0678631	0.0717389	9.19967	10.4094	12.4078	9.56582	0.204417	10.3033	12.7769	8.98813	0	8.62988	10.7068	11.9256	9.02653	0	TGAAGCTGCCAGCATGATCTA	21
aly-miR167c-5p>ath-miR167c-5p	0	0	0	0.0717389	0.0347157	0.233544	0.0971891	0	0	0	0	0.0369882	0	0.0609886	0	0	0.0340624	0	TAAGCTGCCAGCATGATCTTG	21
aly-miR167d-5p>ath-miR167d>cca-miR167>eun-miR167b-5p>nta-miR167a>nta-miR167b>nta-miR167c>pab-miR167b>rco-miR167c	177.626	10.1628	0.0678631	117.975	8.1582	0	0.161982	0.0741536	0.0511043	0.131671	0.173599	117.586	0.270935	0	0.0947506	0.241269	87.4041	0.263438	TGAAGCTGCCAGCATGATCTGG	22
aly-miR168a-3p>ath-miR168a-3p>bra-miR168b-3p>bra-miR168c-3p>cas-miR168>csi-miR168-3p>fve-miR168-3p>mtr-miR168c-3p>ptc-miR168a-3p>ptc-miR168b-3p>sly-miR168b-3p	172.137	150.038	21.0715	99.3584	18.1563	1.80162	418.723	3.11445	17.3755	387.707	393.514	444.709	1.11761	2.56152	115.975	351.425	444.957	6.68475	CCCGCCTTGCATCAACTGAAT	21
aly-miR168a-5p>aly-miR168b-5p>aof-miR168a>ath-miR168a-5p>ath-miR168b-5p>atr-miR168>bna-miR168a>bra-miR168a-5p>cca-miR168a>ccl-miR168>crt-miR168>csi-miR168-5p>fve-miR168-5p>gma-miR168a>lus-miR168a>lus-miR168b>mdm-miR168a>mdm-miR168b>mes-miR168a>mtr-miR168b>mtr-miR168c-5p>nta-miR168d>nta-miR168e>pab-miR168a>ppe-miR168>ptc-miR168a-5p>ptc-miR168b-5p>rco-miR168>tcc-miR168>vca-miR168a-5p>vca-miR168b-5p…	8.55298	9.79854	44.9254	9.57715	13.2267	42.972	2.10576	1.26061	15.6379	13.2001	102.528	0.591811	28.7191	44.5827	32.1205	109.95	134.24	140.446	TCGCTTGGTGCAGGTCGGGAA	21
aly-miR168b-3p>ath-miR168b-3p	0	0	0	0	0	0	0	0	0	0.0329179	0	0	0.0338668	0.0304943	0	0	0	0	CCCGTCTTGTATCAACTGAAT	21
aly-miR169m-3p	0	0	0	0	0	0	0	0	0	0	0	0	0.0338668	0.0304943	0	0	0.0340624	0	GGCAGTCTTCTTGGCTATC	19
aly-miR170-3p>ath-miR170-3p>stu-miR171c-3p	0	0	0	0	0	0	0	0	0	0	0	0	0	0.0304943	0	0	0	0	TGATTGAGCCGTGTCAATATC	21
aly-miR171a-3p>ath-miR171a-3p>atr-miR171a>atr-miR171c>bdi-miR171a>bna-miR171f>bra-miR171e>ccl-miR171>cme-miR171e>cme-miR171a>cme-miR171g>mdm-miR171c>mdm-miR171d>mdm-miR171e>osa-miR171a>sbi-miR171g>sbi-miR171j>tcc-miR171a>vvi-miR171e>zma-miR171n-3p	0.0336732	0	0	0	0	0	0	0	0.102209	0.0987536	0	0	0.0338668	0	0	0	0.0340624	0	TGATTGAGCCGCGCCAATATC	21
aly-miR171b-3p>aly-miR171c-3p>ata-miR171c-3p>ath-miR171b-3p>ath-miR171c-3p>bna-miR171a>bna-miR171b>bna-miR171c>bna-miR171d>bna-miR171e>bol-miR171a>bra-miR171a>bra-miR171b>bra-miR171c>bra-miR171d>cas-miR171b>cas-miR171c-3p>cme-miR171d>cme-miR171b>gma-miR171i-3p>lus-miR171i>mdm-miR171f-3p>mes-miR171b>mes-miR171c>mtr-miR171f>ptc-miR171a-3p>ptc-miR171b>rco-miR171a>rco-miR171b>sly-miR171b-3p>ssl-miR17…	0.269385	0.109277	0.135726	0.143478	0.312442	0.30027	0.323964	0.593229	0.204417	0.263343	0.104159	0.443858	0.237068	0.0914829	0.157918	0.551471	0.13625	0.362228	TTGAGCCGTGCCAATATCACG	21
aly-miR171c-5p>ath-miR171c-5p>cas-miR171c-5p>fve-miR171c-5p>gma-miR171c-5p>lus-miR171d	0	0	0	0	0	0	0.0323964	0.0741536	0.102209	0	0	0	0	0	0	0.0689339	0	0.0658596	AGATATTGGTGCGGTTCAATC	21
aly-miR172a-3p>aly-miR172b-3p>aof-miR172>aqc-miR172a>ata-miR172b-3p>ath-miR172a>ath-miR172b-3p>bdi-miR172a-3p>bna-miR172a>bol-miR172a>bol-miR172b>bra-miR172a>bra-miR172b-3p>cas-miR172a-3p>cas-miR172b>cca-miR172>cme-miR172b>cme-miR172c>csi-miR172b-3p>dpr-miR172a>dpr-miR172b>egu-miR172a>egu-miR172b>egu-miR172c>eun-miR172a-3p>eun-miR172b-3p>eun-miR172c-3p>fve-miR172b>fve-miR172c>fve-miR172a>gma-miR1…	0.168366	0.582813	10.6206	0.466303	0.798462	0.0667267	3.33683	4.48629	0	0.888782	5.55517	0.665788	10.2617	0.0914829	0.0315835	0.999542	0	0.0658596	AGAATCTTGATGATGCTGCAT	21
aly-miR172a-5p>cas-miR172a-5p	0	0.0364258	0.0678631	0.0717389	0.0694315	0.10009	0.0323964	0.0370768	0	0.0658357	0.0347198	0.0739764	0	0.0914829	0.0947506	0.0689339	0.102187	0.0329298	GTGGCATCATCAAGATTCACA	21
aly-miR172c-3p>aly-miR172d-3p>aly-miR172f-3p>ath-miR172c>ath-miR172d-3p>bna-miR172d>bra-miR172c-3p>cme-miR172e>lja-miR172a>mdm-miR172m>mdm-miR172n>mdm-miR172o>nta-miR172a>sly-miR172c	8.11523	4.15254	8.924	10.2945	5.58923	9.54192	2.6565	2.03922	1.73755	6.38607	4.33998	4.29063	5.58803	6.00738	7.8643	2.13695	1.39656	1.58063	AGAATCTTGATGATGCTGCAG	21
aly-miR172c-5p>aly-miR172f-5p>cas-miR172c>ptc-miR172b-5p>ptc-miR172g-5p>stu-miR172d-5p	0.202039	0.182129	0	0.0717389	0.173579	0.0667267	0.0323964	0	0	0.230425	0.0347198	0.221929	0.0338668	0.335437	0.0315835	0	0	0	GGAGCATCATCAAGATTCACA	21
aly-miR172e-3p	0	0	0	0.107608	0.104147	0	1.26346	0	0.0511043	0.230425	1.00687	0.0739764	0.203201	1.09779	0	0	0	0.0329298	GAATCTTGATGATGCTGCAT	20
aly-miR2111a-5p>aly-miR2111b-5p>aly-miR2111c-5p>ath-miR2111a-5p>ath-miR2111b-5p>bna-miR2111b-5p>bna-miR2111a-5p>bna-miR2111d>bra-miR2111a-5p>bra-miR2111b-5p>cme-miR2111a>cme-miR2111b>gma-miR2111b>gma-miR2111c>gma-miR2111e>gma-miR2111f>lja-miR2111-5p>mdm-miR2111a>mdm-miR2111b>mes-miR2111a>mes-miR2111b>mtr-miR2111c>mtr-miR2111d-5p>mtr-miR2111e-5p>mtr-miR2111g-5p>mtr-miR2111h>mtr-miR2111i>mtr-miR211…	0.0336732	0.0364258	0.169658	0	0.0347157	0.0333634	0	0	0.0511043	0.0658357	0.0347198	0	0	0	0.0315835	0.034467	0.0681248	0.0329298	TAATCTGCATCCTGAGGTTTA	21
aly-miR319b-5p>cas-miR319b	0	0	0	0	0	0	0	0	0	0	0	0	0.0338668	0	0.0315835	0	0	0	AGAGCTTTCTTCGGTCCACTC	21
aly-miR319c-3p>aly-miR319d-3p>ath-miR319c>mes-miR319g>pvu-miR319c>rco-miR319d>sly-miR319c-3p	2.52549	0.582813	0.44111	0	4.51304	138.158	0	33.6287	23.3036	61.5564	0.416638	0.184941	0	4.23871	0.189501	3.4467	0.13625	0.164649	TTGGACTGAAGGGAGCTCCTT	21
aly-miR3433-3p	0	0	0	0	0	0	0	0	0	0.0329179	0	0	0	0	0	0	0	0	TCACAGTTCTTGATTACCCAC	21
aly-miR3436-3p	0	0	0	0	0	0	0.0323964	0	0	0	0	0	0	0	0	0	0	0	CAACAACGATTTTTGGGTCGTT	22
aly-miR3446-5p	0	0	0	0	0	0	0	0	0	0	0	0	0	0	0.0315835	0	0	0	CTCGGAAGCTAGACGTGTGGCAGG	24
aly-miR3448-3p	0	0	0	0	0	0	0	0	0	0	0	0	0	0	0	0.034467	0	0	TCTGAGGATTTTTTTTGTGGTC	22
aly-miR390a-3p>ath-miR390a-3p>cas-miR390a-3p>csi-miR390a-3p>lja-miR390a-3p>lja-miR390b-3p>sly-miR390b-3p	1.27958	0.218555	1.01795	0.502173	0.312442	0.233544	7.71034	3.93014	5.57037	0.888782	0.937435	0.665788	0.372535	0.365931	0.568504	1.89568	1.60093	2.00872	CGCTATCCATCCTGAGTTTCA	21
aly-miR390a-5p>aly-miR390b-5p>aof-miR390>ata-miR390-5p>ath-miR390a-5p>ath-miR390b-5p>atr-miR390.2>bdi-miR390a-5p>bna-miR390a>bna-miR390b>bna-miR390c>bra-miR390-5p>cas-miR390a-5p>cas-miR390b>cme-miR390b>cme-miR390d>cme-miR390a>cme-miR390c>cpa-miR390a>cpa-miR390b>csi-miR390a-5p>fve-miR390a>fve-miR390b>ghr-miR390a>ghr-miR390b>ghr-miR390c>gma-miR390a-5p>gma-miR390f>gma-miR390g>hex-miR390a>hex-miR390b…	2.62651	2.65908	1.45906	0.64565	0.72903	0.767357	8.68223	13.051	9.24988	1.67881	1.84015	1.29459	0.372535	0.487909	0.726422	3.8603	4.32592	4.18208	AAGCTCAGGAGGGATAGCGCC	21
aly-miR390b-3p	0.0336732	0	0.203589	0.0358695	0	0	0.0647927	0.407845	0.153313	0.263343	0.173599	0.0369882	0	0.304943	0.0315835	0	0	0.131719	CGCTATCCATCCTGAGTTCCA	21
aly-miR393a-3p>ath-miR393a-3p>cas-miR393-3p	0	0	0	0	0	0	0	0	0	0	0	0	0	0	0.0315835	0	0	0	ATCATGCTATCTCTTTGGATT	21
aly-miR393a-5p>aly-miR393b-5p>ath-miR393a-5p>ath-miR393b-5p>atr-miR393>cas-miR393-5p>cpa-miR393>gma-miR393c-5p>gma-miR393d>gma-miR393e>gma-miR393f>gma-miR393g>htu-miR393a>htu-miR393b>htu-miR393c>mes-miR393b>stu-miR393-5p>tcc-miR393a>zma-miR393b-5p	0.0336732	0	0.0339315	0	0	0	0.0647927	0	0	0	0.0347198	0	0	0.0304943	0	0.034467	0	0	TCCAAAGGGATCGCATTGATCC	22
aly-miR395b-3p>aly-miR395f-3p>aly-miR395h-3p>ath-miR395b>ath-miR395c>ath-miR395f>bna-miR395d>bna-miR395e>bna-miR395f>cas-miR395b>cas-miR395c-3p	0	0	0	0	0	0	0	0	0.0511043	0.131671	0.0347198	0	0	0	0	0	0	0.0329298	CTGAAGTGTTTGGGGGGACTC	21
aly-miR395c-3p	0.0336732	0	0	0	0	0	0	0	0	0	0.0347198	0	0	0	0.0315835	0	0	0	CTGAAGTGTTTGGGGGGACTT	21
aly-miR395d-3p>aly-miR395e-3p>aly-miR395g-3p>ath-miR395a>ath-miR395d>ath-miR395e>atr-miR395>bna-miR395a>bna-miR395b>bna-miR395c>bra-miR395d-3p>bra-miR395b-3p>bra-miR395c-3p>bra-miR395a-3p>cas-miR395a>cas-miR395d-3p>cme-miR395a>cme-miR395e>cme-miR395d>cme-miR395f>csi-miR395a>csi-miR395b-3p>csi-miR395c-3p>gma-miR395a>gma-miR395b>gma-miR395c>lus-miR395a>lus-miR395b>lus-miR395c>lus-miR395d>mdm-miR395…	0.74081	0.0364258	0.203589	0.179347	1.52749	0.133453	0.35636	0	0	1.21796	0	0.480847	0.0338668	0.0914829	1.67393	0.310203	1.26031	1.15254	CTGAAGTGTTTGGGGGAACTC	21
aly-miR395e-5p>aly-miR395g-5p>bra-miR395d-5p>bra-miR395b-5p>bra-miR395c-5p>bra-miR395a-5p	0	0	0	0	0	0	0	0	0	0	0	0	0.0677337	0.0304943	0	0	0	0	GTTCCTCTGAGCACTTCATTG	21
aly-miR395i>cca-miR395b>cca-miR395c>lus-miR395e	0	0	0	0	0	0	0	0	0	0.0329179	0	0	0	0	0	0	0	0	CTGAAGTGTTTGGAGGAACTC	21
aly-miR396a-3p>ath-miR396a-3p>csi-miR396b-3p>eun-miR396a-3p>fve-miR396a-3p>fve-miR396c-3p>gma-miR396i-3p>mtr-miR396b-3p>sly-miR396a-3p	203.588	151.823	152.081	89.2791	68.2511	88.7132	926.73	734.899	854.515	312.094	253.385	226.553	124.325	139.786	113.511	791.499	756.287	761.403	GTTCAATAAAGCTGTGGGAAG	21
aly-miR396b-3p>ath-miR396b-3p>bra-miR396-3p	0	0	0	0	0.0347157	0	0	0	0	0	0	0	0	0	0	0	0	0	GCTCAAGAAAGCTGTGGGAAA	21
aly-miR396b-5p>ama-miR396-5p>aqc-miR396b>ata-miR396c-5p>ath-miR396b-5p>atr-miR396b>atr-miR396c>atr-miR396e>bcy-miR396b>bdi-miR396e-5p>bgy-miR396b>bna-miR396a>bra-miR396-5p>cas-miR396b>cca-miR396a-5p>ccl-miR396>cme-miR396a>cme-miR396c>cme-miR396d>csi-miR396f-5p>fve-miR396b-5p>gma-miR396b-5p>gma-miR396c>gma-miR396k-5p>lus-miR396b>lus-miR396e>mdm-miR396c>mdm-miR396d>mdm-miR396e>mes-miR396c>mes-miR39…	10.4387	6.15596	115.401	115.033	44.9221	11.1434	23.9409	18.5013	17.3244	13.3647	86.3135	9.35802	11.0067	13.7834	15.0022	62.0405	10.389	10.4058	TTCCACAGCTTTCTTGAACTT	21
aly-miR397a-5p>aly-miR397b-5p>ath-miR397a>bdi-miR397a>cas-miR397>cme-miR397>csi-miR397-5p>fve-miR397>gma-miR397a>gma-miR397b-5p>lus-miR397b>mes-miR397b>mtr-miR397-5p>osa-miR397a>ppe-miR397>ptc-miR397a>rco-miR397>sbi-miR397-5p>ssl-miR397>tcc-miR397>vca-miR397-5p>vvi-miR397a	0.168366	0.291406	0.0339315	0.0717389	0.104147	0.0333634	0	1.26061	0.71546	0	0	0.0369882	0.0338668	0	0	0.585938	0.476873	0.362228	TCATTGAGTGCAGCGTTGATG	21
aly-miR398a-3p>aqc-miR398a>ath-miR398a-3p>bol-miR398a-3p>cme-miR398b>csi-miR398a-3p>ghr-miR398>gma-miR398a>gma-miR398b-3p>gra-miR398>mdm-miR398a>mtr-miR398a-3p>osa-miR398a>ptc-miR398a>rco-miR398a>tcc-miR398b>vvi-miR398a	0.202039	0	0	0.0358695	0.138863	0.10009	0.129585	0.222461	0	0	0.104159	0.0369882	0.135467	0.0914829	0.0947506	0	0.0340624	0.164649	TGTGTTCTCAGGTCACCCCTT	21
aly-miR398b-3p>ath-miR398b-3p>ath-miR398c-3p>bra-miR398-3p	0	0.0364258	0	0.0717389	0.104147	0	0.0323964	0.0370768	0.0511043	0	0.0694396	0	0.406402	0.121977	0.789589	0.0689339	0	0.164649	TGTGTTCTCAGGTCACCCCTG	21
aly-miR399a-3p>aly-miR399h-3p>ath-miR399f>bdi-miR399d>bna-miR399a>bna-miR399b>cme-miR399c>csi-miR399a-3p>csi-miR399e-3p>lus-miR399a>lus-miR399c>lus-miR399e>mes-miR399b>mes-miR399c>mes-miR399d>mes-miR399g>ptc-miR399b>rco-miR399b>rco-miR399c>tcc-miR399b>tcc-miR399d>vvi-miR399e	0	0	0	0	0	0	0	0	0	0.0329179	0	0	0	0	0	0	0	0	TGCCAAAGGAGATTTGCCCGG	21
aly-miR399a-5p	0	0	0	0	0	0	0	0	0	0	0	0	0	0	0	0	0.0681248	0	GGGTAAGATCTCTATTGGCAGG	22
aly-miR399b-3p>aly-miR399c-3p>aof-miR399a>ath-miR399b>ath-miR399c-3p>csi-miR399d-3p>fve-miR399a>gma-miR399a>gma-miR399b>gma-miR399c>gma-miR399h>mdm-miR399i>mdm-miR399j>mes-miR399f>mtr-miR399l>mtr-miR399p>osa-miR399d>pab-miR399d>pvu-miR399a>rco-miR399a>sbi-miR399d>sbi-miR399i>tcc-miR399i>vun-miR399a>vvi-miR399b>vvi-miR399c>zma-miR399e-3p>zma-miR399i-3p>zma-miR399j-3p	0.538771	0.109277	0.271452	0.286956	0.555452	0.600541	0.161982	0.0370768	0	0.395014	0.729116	0.480847	0.372535	0.548897	0.44217	0.44807	0.340624	0.428087	TGCCAAAGGAGAGTTGCCCTG	21
aly-miR399d-3p>aly-miR399g-3p>aly-miR399i-3p>ath-miR399d>cme-miR399a>ghr-miR399e>hvu-miR399>ptc-miR399a>tcc-miR399h	0	0	0	0.0358695	0.0347157	0.0667267	0	0	0	0.0329179	0.0347198	0	0.0338668	0.0914829	0.0315835	0.0689339	0	0	TGCCAAAGGAGATTTGCCCCG	21
aly-miR399e-3p>ath-miR399e	0	0	0	0.0358695	0	0	0	0	0	0	0	0	0	0	0	0	0	0	TGCCAAAGGAGATTTGCCTCG	21
aly-miR399f-3p>ath-miR399a>cca-miR399>ghr-miR399d>gma-miR399j>gma-miR399k>mtr-miR399c>mtr-miR399h>mtr-miR399i	0	0.0364258	0	0.0717389	0.0347157	0.0333634	0	0	0	0.0987536	0.104159	0	0	0	0.0947506	0	0	0.0329298	TGCCAAAGGAGATTTGCCCTG	21
aly-miR403a-3p>aly-miR403b-3p>ath-miR403-3p>bna-miR403>bra-miR403-3p>csi-miR403a-3p>csi-miR403b-3p>har-miR403a>hpe-miR403a>htu-miR403a>htu-miR403b>htu-miR403c>htu-miR403d>htu-miR403e>mdm-miR403a>mdm-miR403b>mes-miR403a>mes-miR403b>ppe-miR403>ptc-miR403a>ptc-miR403b>ptc-miR403c-3p>ptc-miR403d>rco-miR403a>rco-miR403b>tcc-miR403a>tcc-miR403b>vvi-miR403a>vvi-miR403b>vvi-miR403c>vvi-miR403d>vvi-miR403…	73.6432	2.33125	1.01795	69.4433	38.8469	49.6781	200.825	0.333691	4.95712	0.427932	96.5905	2.58917	0.372535	2.04312	0.44217	7.68613	155.393	5.99322	TTAGATTCACGCACAAACTCG	21
aly-miR408-5p	0	0	0	0	0	0	0	0	0	0	0	0	0.0677337	0.0304943	0.0315835	0	0	0	CAGGGAACAAGCAGAGCATGG	21
aly-miR4249	0	0	0	0.0358695	0	0	0	0	0	0	0	0	0	0	0	0	0	0	TGAATTTGAGAAGTTGAGGTA	21
aly-miR4250	0	0	0	0	0	0	0	0.0370768	0	0	0	0	0	0	0	0	0	0	TCCAAAGGCACAAGAACATCA	21
aly-miR472-3p>ath-miR472-3p	0	0	0	0	0	0	0	0	0	0	0	0	0	0	0.0315835	0	0	0	TTTTTCCTACTCCGCCCATACC	22
aly-miR824-3p>ath-miR824-3p	0	0	0	0	0	0	0	0	0	0	0	0	0	0.0304943	0	0	0	0	CCTTCTCATCGATGGTCTAGA	21
aly-miR824-5p>ath-miR824-5p>bna-miR824>bol-miR824>bra-miR824	0	0	0	0.0358695	0	0	0	0	0	0	0	0	0	0	0	0	0	0	TAGACCATTTGTGAGAAGGGA	21
aly-miR825-5p>cas-miR825	0	0	0	0	0	0	0.0323964	0	0	0	0	0	0	0	0	0.034467	0	0	TCAAGCACCAGCTCGAAGAAGC	22
aly-miR845a-3p	0.0673463	0	0	0	0	0	0	0.0370768	0	0	0	0	0	0	0	0	0	0	CGGCTCTGATACCAGTTGATG	21
aly-miR846-3p>ath-miR846-3p	0	0	0	0	0	0	0	0	0	0	0	0	0.0677337	0.0304943	0.0631671	0	0	0	TTGAATTGAAGTGCTTGAATT	21
aly-miR858-3p	0	0	0	0	0	0	0	0	0	0.0987536	0	0	0.0338668	0	0.0631671	0	0	0.0329298	GGTCGAGCAGACAACGAAGAT	21
aly-miR858-5p>ath-miR858a>cas-miR858	15.9274	6.95733	4.61469	22.3825	5.0685	3.66997	12.6994	7.89736	9.65872	12.3113	8.08972	6.39896	5.21549	19.0894	20.2135	6.65212	4.05342	1.38305	TTTCGTTGTCTGTTCGACCTT	21
ama-miR156	28.1171	0.327832	35.3906	51.7596	0.104147	28.7259	0.745116	66.5899	0	34.2017	2.53455	0.332894	0.101601	0.42692	0.284252	0.103401	0.238437	0.0987894	CTGACAGAAGAGAGTGAGCAC	21
ama-miR396-3p	0	0	0	0	0	0	0	0	0	0	0.0347198	0	0	0.0304943	0	0	0	0	AAGCTCAAGAAAGCTGTGGGA	21
aof-miR12169	0	0	0	0	0	0.0333634	0	0	0	0	0	0	0	0	0	0	0	0	TAGGAGTTATTGGATTGGGTT	21
aof-miR160b	0	0	0	0	0	0	0	0	0	0.0658357	0	0	0.0338668	0	0	0.034467	0.0340624	0	TGCCTGGTTCCCTGTATGCCA	21
aof-miR166a>atr-miR166b>bdi-miR166f>csi-miR166b-3p>csi-miR166d-3p>csi-miR166g-3p>gma-miR166h-3p>gma-miR166k>pab-miR166e	313.497	290.132	310.542	188.1	212.113	248.123	556.926	651.217	583.56	286.385	253.837	251.298	135.095	174.946	165.435	421.014	496.085	472.18	TCTCGGACCAGGCTTCATTCC	21
aof-miR166b	81.0176	61.5596	86.8308	71.2726	101.891	65.5257	211.678	150.161	138.697	122.29	81.5916	91.9157	45.8218	83.7068	60.7352	99.1959	134.512	153.387	TCTCGGACCAGGCTTCATTCT	21
aof-miR166c>ath-miR165a-3p>ath-miR165b>bna-miR166f>cas-miR165a>lus-miR166b	13.4019	6.81163	5.56477	9.03911	5.9711	5.40487	3.11005	4.81998	7.92117	7.27485	12.7422	11.5773	2.91255	7.22715	8.93814	2.96416	2.41843	9.64843	TCGGACCAGGCTTCATCCCCC	21
aof-miR167b>ata-miR167b-5p>ata-miR167d-5p>bdi-miR167c-5p>bdi-miR167d-5p>bdi-miR167e-5p>bdi-miR167g>ccl-miR167a>ccl-miR167b>cpa-miR167d>ctr-miR167>eun-miR167a-5p>gma-miR167g>mes-miR167d>mes-miR167e>mes-miR167f>ppe-miR167c>vca-miR167a-5p>vca-miR167b-5p	2.12141	0.69209	28.1632	0.896737	70.1258	87.3787	11.5655	79.5297	0.919878	2.86385	1.24991	1.18362	82.2964	81.8772	0.663254	1.58548	0.783435	0.823245	TGAAGCTGCCAGCATGATCTGA	22
aof-miR167c>atr-miR167>cme-miR167d>cme-miR167f>csi-miR167c-5p>csi-miR167a-5p>dpr-miR167c>gma-miR167c>gma-miR167j>gso-miR167a>lja-miR167>lus-miR167f>lus-miR167g>lus-miR167i>mes-miR167a>mtr-miR167b-5p>osa-miR167d-5p>osa-miR167e-5p>osa-miR167f>osa-miR167g>osa-miR167h-5p>osa-miR167i-5p>osa-miR167j>ptc-miR167e>sbi-miR167d>sbi-miR167f>sbi-miR167g>sbi-miR167e>sbi-miR167c>sbi-miR167h>sof-miR167a>sof-miR1…	0.63979	0.145703	0.475042	0	0	8.87466	0.226775	0.185384	0	181.246	0.104159	5.47425	7.3491	0	8.93814	115.085	0	92.862	TGAAGCTGCCAGCATGATCTG	21
aof-miR168b	2.42447	1.52988	3.59674	1.47065	2.88141	4.53742	1.65221	4.74583	1.94196	2.30425	2.67343	3.144	0.880538	3.68981	1.26334	1.37868	1.3625	3.52349	TCGCTTGGTGCAGGTCGGGTC	21
aof-miR169c>atr-miR169a>atr-miR169c>csi-miR169b-5p>csi-miR169c-5p>csi-miR169d-5p>csi-miR169e-5p>csi-miR169f-5p>csi-miR169h-5p>csi-miR169i-5p>csi-miR169j-5p>csi-miR169l-5p>csi-miR169p-5p>csi-miR169q-5p>fve-miR169a>fve-miR169b>fve-miR169c>fve-miR169d>mes-miR169ac>sbi-miR169d-5p>stu-miR169a-5p>stu-miR169b-5p>stu-miR169c-5p>stu-miR169d-5p>stu-miR169e-5p>stu-miR169f-5p>stu-miR169g>stu-miR169h	0	0	0	0	0	0	0	0	0	0.0329179	0	0	0	0	0	0	0	0	TAGCCAAGGATGACTTGCCT	20
aof-miR171a>aqc-miR171a>aqc-miR171b>aqc-miR171d>ata-miR171d-3p>ata-miR171b-3p>bdi-miR171c-3p>bdi-miR171b>bdi-miR171d-3p>bdi-miR171e>cme-miR171c>cme-miR171f>cpa-miR171a>cpa-miR171b>cpa-miR171c>cpa-miR171d>crt-miR171>csi-miR171c-3p>csi-miR171d-3p>csi-miR171f-3p>csi-miR171h-3p>csi-miR171i-3p>far-miR171>fve-miR171a>fve-miR171d>fve-miR171e>fve-miR171g>fve-miR171c-3p>gma-miR171e>gma-miR171f>gma-miR171g…	1.54897	0.509961	0.746494	1.21956	1.14562	1.20108	0.680324	1.26061	1.27761	1.2838	0.451358	1.10965	0.372535	0.823346	0.884339	0.896141	1.12406	0.823245	TGATTGAGCCGTGCCAATATC	21
aof-miR171b>fve-miR171f-3p>gma-miR171k-3p>lja-miR171d-5p>mdm-miR171j>mdm-miR171k>mdm-miR171l>mes-miR171e>nta-miR171b>pab-miR171b>pab-miR171c>ppe-miR171b>ssl-miR171b>vvi-miR171f	1.95304	2.00342	1.59478	0.609781	1.18033	0.433724	2.23535	1.37184	1.48203	2.46884	1.35407	1.96037	1.15147	1.25027	0.789589	2.13695	2.14593	1.58063	TTGAGCCGCGCCAATATCACT	21
aof-miR2275d	0	0	0	0	0	0	0	0	0	0	0.0347198	0	0	0	0	0	0	0	AGAATTAGAGGATTGCAAACC	21
aof-miR319b>atr-miR319b>atr-miR319d>atr-miR319e>cas-miR319c>csi-miR159d>fve-miR319>tcc-miR319>vvi-miR319e	0.673463	0.69209	0.814357	85.6922	2.74254	8.87466	0.291567	0.593229	2.19749	1.4813	0.555517	42.7584	3.58988	0.243954	33.068	8.6512	0.238437	0.0658596	TTTGGACTGAAGGGAGCTCCT	21
aof-miR393a	0.0336732	0	0.0678631	0	0.104147	0.10009	0	0.0370768	0	0	0.0347198	0.0369882	0.0677337	0.0304943	0.0947506	0.034467	0.0340624	0	TCCAAAGGGATCGCATTGATTC	22
aof-miR393b>fve-miR393b>ghr-miR393>mdm-miR393a>mdm-miR393b>mdm-miR393c>mes-miR393c>mes-miR393d>osa-miR393b-5p>zma-miR393a-5p>zma-miR393c-5p	0.101019	0.0364258	0.0339315	0	0	0	0	0	0.0511043	0	0.0347198	0	0	0	0.0315835	0.034467	0	0	TCCAAAGGGATCGCATTGATCT	22
aof-miR395a	0.0336732	0.109277	0.101795	0.68152	0.138863	2.10189	0.194378	0.222461	0.408835	0.46085	0.138879	0.147953	0.237068	0.182966	0.252668	0.551471	1.3625	0.230509	TGAAGTGTTTGGGGGAACTCT	21
aof-miR395b	0	0	0	0	0	0	0	0	0	0	0	0	0	0	0.0315835	0.034467	0	0.0329298	ATGAAGTGTATGGGGGAACTC	21
aof-miR396a>cme-miR396e>eun-miR396a-5p>mdm-miR396f>mdm-miR396g>ptc-miR396f	0.235712	0.109277	0.44111	0.143478	0.381873	0.700631	0.323964	0.0370768	0.255522	0.395014	0.104159	0.702776	0.440269	0.243954	0.44217	0.241269	0.170312	0.296368	TTCCACGGCTTTCTTGAACTG	21
aof-miR398>aqc-miR398b>bdi-miR398a>cca-miR398>cme-miR398a>csi-miR398b-3p>gma-miR398c>gma-miR398d>lus-miR398a>mdm-miR398b>mdm-miR398c>mes-miR398>mtr-miR398b>mtr-miR398c>nta-miR398>osa-miR398b>ppe-miR398a-3p>ptc-miR398b>ptc-miR398c-3p>rco-miR398b>tcc-miR398a>vvi-miR398b>vvi-miR398c	1.14489	0.947071	0.678631	0.322825	0.520736	1.06763	13.3797	17.389	13.6449	0.855865	0.555517	0.776752	0.711204	0.85384	1.07384	7.37593	8.89028	6.98112	TGTGTTCTCAGGTCGCCCCTG	21
aof-miR408>cca-miR408>fve-miR408>nta-miR408>ppt-miR408b>stu-miR408b-3p>vca-miR408-3p	4.00711	0.109277	1.79837	0.0717389	2.36067	1.3679	9.8161	0.593229	0	0	1.70127	1.5535	0.880538	0.0304943	0.600087	8.75461	0.102187	1.08668	TGCACTGCCTCTTCCCTGGCT	21
aof-miR477a>mes-miR477i	0	0	0	0	0	0.0667267	0	0	0.0511043	0.0658357	0	0	0	0	0	0.0689339	0	0	ACTCTCCCTCAAGGGCTTCCG	21
aof-miR479>ata-miR171a-3p>mdm-miR171i>stu-miR479	0.909175	0.254981	0.475042	0.215217	0.277726	0.133453	0.323964	0.11123	0.0511043	0.230425	0.173599	0.147953	0.0677337	0.304943	0	0.0689339	0.0340624	0.0329298	TGAGCCGAACCAATATCACTC	21
aqc-miR159	23.4028	10.1628	12.6904	24.3554	22.8777	19.8512	8.22868	9.41751	7.1546	25.1163	22.6026	19.8997	18.4236	15.3996	17.8131	2.51609	2.11187	2.60145	TTTGGACTGAAGGGAGCTCTA	21
aqc-miR160a>cca-miR160a>lus-miR160c>lus-miR160g>ptc-miR160g>tcc-miR160c	0	0	0	0	0	0	0	0	0	0	0	0	0	0.0304943	0	0	0	0	TGCCTGGCTCCCTGGATGCCA	21
aqc-miR166a>aqc-miR166d>cme-miR166e>dpr-miR166a>lus-miR166e>mtr-miR166c>mtr-miR166f>osa-miR166g-3p>osa-miR166h-3p>pab-miR166a>sbi-miR166f>sly-miR166c-3p>ssl-miR166a>stu-miR166b>tcc-miR166c>zma-miR166l-3p>zma-miR166m-3p	190.758	129.129	214.04	83.827	103.8	120.609	253.307	242.112	195.27	116.858	133.046	117.622	69.3931	96.8499	86.9811	222.588	212.106	225.964	TCGGACCAGGCTTCATTCCTC	21
aqc-miR166c>sbi-miR166k	22.7967	0.0364258	0.0339315	14.8141	2.18709	0	4.85945	0	0	61.9514	0	23.4135	10.9729	0.0914829	0	0	13.5228	14.2915	TCGGACCAGGCTTCATTCCT	20
aqc-miR167>cme-miR167e	0	0	0	0.0358695	0.0347157	0	0.0323964	0.0370768	0	0	0	0	0	0.0304943	0	0	0	0.0329298	TCAAGCTGCCAGCATGATCTA	21
aqc-miR171f	0	0	0	0	0	0.0667267	0	0	0	0	0	0.0739764	0	0	0.0315835	0.103401	0	0	TAATTGAGCCGTGCCAATATC	21
aqc-miR172b>ata-miR172c-3p>ath-miR172e-3p>bdi-miR172b>bna-miR172b>bna-miR172c>bra-miR172d-3p>cme-miR172d>gma-miR172i-3p>gma-miR172l>lus-miR172g>mdm-miR172i>mdm-miR172j>mdm-miR172k>nta-miR172j>osa-miR172b>ppe-miR172c>ptc-miR172d>ptc-miR172e>tcc-miR172c>zma-miR172e	1.07754	0.947071	0.407179	0.932606	0.0347157	0.533814	0.0647927	1.48307	0.0511043	0	0.0694396	0	0.948271	0.0304943	0	0.0689339	0.613123	0.493947	GGAATCTTGATGATGCTGCAT	21
aqc-miR399>cme-miR399b>csi-miR399b-3p>mdm-miR399d>osa-miR399j>ptc-miR399i>sly-miR399>stu-miR399i-3p	0	0	0.101795	0.0717389	0.0347157	0	0.0971891	0	0	0.0987536	0.0347198	0.110965	0.0677337	0.0304943	0.126334	0.034467	0.0340624	0	TGCCAAAGGAGAGTTGCCCTA	21
aqc-miR477e>aqc-miR477a>aqc-miR477b	0.168366	0	0.0339315	0.0358695	0	0.0333634	0.0323964	0.0370768	0	0	0	0	0	0	0.126334	0.0689339	0.0340624	0	CTCTCCCTCAAGGGCTTCTA	20
ata-miR156b-3p	0	0	0	0	0	0	0.0323964	0	0	0.0329179	0.0347198	0	0	0	0	0	0.0340624	0	GCTCATTTCTCTCTCTGTCAGC	22
ata-miR164a-5p>bdi-miR164c-5p>cme-miR164a>osa-miR164d>sbi-miR164b>zma-miR164f-5p	5.75811	25.3888	28.6722	34.2195	9.19967	38.7349	11.3387	4.11553	163.585	378.852	362.579	48.5285	30.5818	4.84859	11.4332	69.7956	1.32843	72.0175	TGGAGAAGCAGGGCACGTGCT	21
ata-miR164c-3p	0.0336732	0	0	0	0	0	0.0323964	0	0	0	0	0	0	0	0	0	0	0	CACGTGTTCTTCTCCTCCATC	21
ata-miR166a-5p>bdi-miR166c-5p>osa-miR166a-5p>osa-miR166e-5p>zma-miR166b-5p>zma-miR166d-5p	0	0	0	0	0	0	0	0	0.0511043	0	0.0347198	0.0369882	0.0338668	0.0304943	0	0	0	0	GGAATGTTGTCTGGTTCAAGG	21
ata-miR166c-3p>bdi-miR166j>lus-miR166f>pab-miR166b>ptc-miR166n>ptc-miR166o>ptc-miR166q	28.4538	20.1435	26.0934	14.85	41.6936	15.2137	49.2749	39.5239	27.9541	22.2525	28.0189	20.1586	12.3953	13.9054	35.4999	45.5308	24.7974	52.2596	TCGGACCAGGCTTCATTCCTT	21
ata-miR166d-5p>bdi-miR166b-5p>osa-miR166b-5p>zma-miR166a-5p	13.9744	8.70577	4.30931	2.22391	2.95084	8.94138	8.32587	8.60182	3.06626	4.90476	9.09659	9.98682	7.68777	3.07992	9.19081	4.99771	3.61061	1.84407	GGAATGTTGTCTGGCTCGGGG	21
ata-miR166e-5p>bdi-miR166d-5p>zma-miR166g-5p	0	0	0.0339315	0	0	0	0	0	0	0	0	0	0	0	0	0	0	0	GGAATGTTGTCTGGTTGGAGA	21
ata-miR167f-3p	0.134693	0.0728516	0.0678631	0.107608	0.104147	0.0333634	0.0971891	0	0	0.164589	0.0694396	0.0369882	0	0.0914829	0.0631671	0.0689339	0.0681248	0.0329298	CAGATCATGCTGCAGCTTCAT	21
ata-miR167f-5p>tae-miR167c-5p	0.235712	85.6735	130.161	0.896737	0.312442	0.30027	104.349	0.0741536	87.4906	0.592522	106.833	0.369882	0.338668	0.152471	77.7903	0.206802	0.306561	0.296368	TGAAGCTGCCAGCATGATCTGC	22
ata-miR168-5p>bdi-miR168-5p>hvu-miR168-5p>osa-miR168a-5p>sbi-miR168>sof-miR168a>ssp-miR168a>zma-miR168a-5p>zma-miR168b-5p	0.0673463	0	0.0678631	0	0.0694315	0	0.0323964	0	0	0.0987536	0.0347198	0.0739764	0	0.0304943	0	0.034467	0.0340624	0	TCGCTTGGTGCAGATCGGGAC	21
ata-miR169g-3p>bdi-miR169a-3p	0	0	0	0	0	0	0	0	0	0	0	0	0.0338668	0	0	0	0	0	GGCGAGTTGTTCTTGGCTACA	21
ata-miR171c-5p>bdi-miR171c-5p	0	0	0	0	0	0	0	0	0	0.0329179	0	0	0	0	0	0	0	0	CGGTATTGGTGCGGTTCAATC	21
ata-miR171d-5p>bdi-miR171d-5p>hvu-miR171-5p	0	0.0364258	0	0	0	0	0	0	0	0	0.0347198	0	0	0.0304943	0	0	0	0	TGTTGGCTCGACTCACTCAGA	21
ata-miR172a-3p	0.909175	0.254981	0.508973	4.98586	3.64515	1.06763	0.0971891	0.407845	0.459939	0.559604	0.451358	0.665788	1.18534	0.884334	1.38968	0.379136	0.13625	0.0658596	AGAATCTTGATGATGCTGCGT	21
ata-miR172c-5p	0.0336732	0.109277	0.135726	0.107608	0.0694315	0.0333634	0	0.11123	0	0	0.243039	0	0	0.152471	0.347419	0	0	0	GTGGCATCATCAAGATTCACACA	23
ata-miR2118a-3p>ata-miR2118b-3p	0.0336732	0	0	0	0	0	0	0	0	0	0	0	0	0	0	0	0	0	GGGAATGGGAACATGGAGGAA	21
ata-miR393-5p	0	0.0364258	0	0	0	0	0	0	0	0	0	0	0	0.121977	0	0.034467	0.0340624	0	TTCCAAAGGGATCGCATTGAT	21
ata-miR395b-3p	0	0.0364258	0	0	0	0.0333634	0	0	0	0	0	0	0	0	0	0	0	0	AAGTGTTTGGGGGAACTC	18
ata-miR395b-5p	0	0	0.0339315	0.0358695	0	0	0.0323964	0	0.204417	0	0	0.0369882	0.0677337	0.0609886	0.0315835	0.034467	0	0.0987894	GTTCCCTGCAAACACTTCACG	21
ata-miR395e-3p>ata-miR395a-3p>ata-miR395d-3p>ata-miR395f-3p>ata-miR395c-3p>bdi-miR395a>bdi-miR395b>bdi-miR395c-3p>bdi-miR395m>bdi-miR395e-3p>bdi-miR395f-3p>bdi-miR395g-3p>bdi-miR395h-3p>bdi-miR395j-3p>bdi-miR395k-3p>bdi-miR395l-3p>bdi-miR395n-3p>bdi-miR395o-3p>bdi-miR395q>cpa-miR395a>cpa-miR395b>cpa-miR395c>cpa-miR395d>cpa-miR395e>tae-miR395b	0	0	0.0678631	0	0	0.834084	0.0971891	0.519075	0.817669	0	0.104159	1.03567	0	0.0304943	0.631671	0.0689339	0	0	TGAAGTGTTTGGGGGAACTC	20
ata-miR396c-3p>bdi-miR396e-3p>osa-miR396c-3p>zma-miR396f-3p	0	0	0	0	0	0	0	0	0	0	0	0.0369882	0	0	0	0	0	0	GGTCAAGAAAGCTGTGGGAAG	21
ata-miR396e-3p>bdi-miR396d-3p>bdi-miR396c-3p>vca-miR396-3p>zma-miR396b-3p>zma-miR396a-3p	20.9447	14.0604	9.67049	29.9151	16.5941	25.4229	57.8275	111.861	85.0376	36.4401	31.3173	50.5629	11.3115	17.4427	34.8998	34.8806	69.9301	51.3705	GTTCAATAAAGCTGTGGGAAA	21
ata-miR398f-3p>ata-miR398g-3p>sbi-miR398>tae-miR398>zma-miR398a-3p>zma-miR398b-3p	0.0673463	0.0728516	0.101795	0.143478	0.0347157	0.0333634	0.226775	0.407845	0.255522	0	0	0.0739764	0.101601	0.0304943	0.0315835	0.172335	0	0.0658596	TGTGTTCTCAGGTCGCCCCCG	21
ata-miR399b-3p>ata-miR399a-3p>bdi-miR399b>bdi-miR399c>csi-miR399c-3p>gma-miR399i>lus-miR399b>lus-miR399d>mdm-miR399a>mdm-miR399b>mdm-miR399c>mes-miR399a>osa-miR399a>osa-miR399b>osa-miR399c>ptc-miR399f>ptc-miR399g>sbi-miR399a>sbi-miR399c>sbi-miR399h>sbi-miR399j>tcc-miR399g>vun-miR399b>vvi-miR399a>vvi-miR399h>zma-miR399a-3p>zma-miR399c-3p>zma-miR399h-3p	2.32345	1.16563	3.01991	4.2326	3.92288	5.30478	0.485945	0.741536	0.970982	2.7651	3.19422	3.25496	3.35282	2.83597	2.90569	1.72335	1.05593	0.691526	TGCCAAAGGAGAATTGCCCTG	21
ata-miR408-3p	0.235712	0.364258	0.101795	0.0358695	0.0694315	0.0667267	0.615531	0.444922	1.83976	0.0329179	0.312478	0.147953	0	0.0304943	0.0631671	0.241269	0.340624	0.362228	TGCACTGCCTCTTCCCTGCC	20
ata-miR5168-3p>bdi-miR166h-3p>osa-miR166k-3p>osa-miR166l-3p>sbi-miR166e>sbi-miR166g>zma-miR166k-3p>zma-miR166j-3p>zma-miR166n-3p	0.235712	0.0364258	0.271452	0.215217	0.173579	0.266907	0.161982	0.148307	0.102209	0.0987536	0.486077	0.221929	3.38668	0.21346	0.0947506	0.0689339	0.102187	0	TCGGACCAGGCTTCAATCCCT	21
ata-miR5181-5p	0	0	0	0	0	0	0.0323964	0	0	0.0329179	0	0	0	0	0	0	0	0	TCCGATCCAGAATAAGTGTCG	21
ata-miR9677-5p	0	0	0.0339315	0	0	0	0	0	0	0	0	0	0	0	0	0	0.0340624	0	TTCCACTCTACCAACAGCCACG	22
ata-miR9776-5p	0	0	0	0	0.0347157	0	0	0	0	0	0	0	0	0	0	0	0	0	AGCTTGGACGAGGATGTGCAA	21
ata-miR9863a-3p>ata-miR9863b-3p	0	0	0	0	0	0	0.0323964	0	0	0	0	0	0	0	0	0	0	0	TGAGAAGGTAGATCATAATAGC	22
ath-miR156b-3p>bra-miR156e-3p>cas-miR156b-3p	0	0	0	0	0.0347157	0	0	0	0	0	0	0	0	0	0.0315835	0	0	0.0658596	TGCTCACCTCTCTTTCTGTCAGT	23
ath-miR156d-3p	0	0	0	0	0	0	0	0	0	0	0	0	0	0.0304943	0	0	0	0	GCTCACTCTCTTTTTGTCATAAC	23
ath-miR156i	0	0	0	0	0	0.0667267	0.0323964	0	0.102209	0.197507	0	0	0.0338668	0.121977	0	0.0689339	0	0	TGACAGAAGAGAGAGAGCAG	20
ath-miR157a-3p>ath-miR157b-3p	0	0	0	0	0	0	0	0	0	0.131671	0	0	0.135467	0.0304943	0.252668	0	0.170312	0	GCTCTCTAGCCTTCTGTCATC	21
ath-miR158b	0	0	0	0	0	0	0	0	0	0	0	0	0	0.0304943	0.0315835	0.034467	0	0	CCCCAAATGTAGACAAAGCA	20
ath-miR161.1	0	0	0.0339315	0	0.0694315	0	0	0	0.0511043	0	0	0.0369882	0.338668	0.0609886	0.568504	0.034467	0	0.0987894	TGAAAGTGACTACATCGGGGT	21
ath-miR163	0	0	0	0	0	0	0	0	0	0	0	0	0.270935	0.0914829	0.126334	0.034467	0	0	TTGAAGAGGACTTGGAACTTCGAT	24
ath-miR165a-5p	0.0673463	0.109277	0.135726	0.0358695	0.104147	0.0333634	0.161982	0	0.0511043	0.0987536	0.0347198	0.0739764	0	0.0609886	0	0	0	0.0329298	GGAATGTTGTCTGGATCGAGG	21
ath-miR167c-3p	0	0	0	0	0	0	0	0	0	0.0987536	0	0	0.0338668	0.0914829	0	0	0	0	TAGGTCATGCTGGTAGTTTCACC	23
ath-miR390b-3p	0	0.0364258	0	0	0	0.366997	0.453549	0.0370768	0	0	0	0	0	0.0609886	0.0315835	0	0	0.0329298	CGCTATCCATCCTGAGTTCC	20
ath-miR398b-5p>ath-miR398c-5p	0	0	0	0.0358695	0.173579	0	0	0	0	0	0	0.0739764	0.474136	0.335437	0.631671	0	0	0.0329298	AGGGTTGATATGAGAACACAC	21
ath-miR403-5p	0	0	0	0	0	0	0	0	0	0	0	0	0.0338668	0	0	0	0	0	TGTTTTGTGCTTGAATCTAATT	22
ath-miR404	0	0	0	0	0	0	0	0	0	0	0	0	0	0	0	0	0.0340624	0	ATTAACGCTGGCGGTTGCGGCAGC	24
ath-miR408-5p	0	0	0	0.0358695	0	0	0	0	0	0.0329179	0	0	0.338668	0	0.189501	0	0	0.0329298	ACAGGGAACAAGCAGAGCATG	21
ath-miR4221	0	0	0	0	0	0	0	0	0	0	0	0	0	0	0	0.0689339	0	0	TTTTCCTCTGTTGAATTCTTGC	22
ath-miR5633	0	0	0	0	0	0	0	0	0	0	0	0	0	0.0304943	0	0	0	0	TATGATCATCAGAAAACAGTG	21
ath-miR5638b	0	0	0.0339315	0	0	0	0	0	0	0	0	0	0	0	0	0	0	0	ACAGTGGTCATCTGGTGGGCT	21
ath-miR5642a>ath-miR5642b	0	0	0	0.0358695	0	0	0	0	0	0	0	0	0	0	0.0631671	0	0	0	TCTCGCGCTTGTACGGCTTT	20
ath-miR5655	0	0.0364258	0	0	0.0347157	0	0	0	0	0	0	0	0	0	0	0	0	0	AAGTAGACACATAAGAAGGAG	21
ath-miR5656	0	0	0.0339315	0	0	0	0	0	0	0	0	0	0	0	0	0	0	0	ACTGAAGTAGAGATTGGGTTT	21
ath-miR5659	0	0	0.0339315	0.0358695	0	0	0	0	0	0	0	0.0369882	0	0	0	0	0	0.0658596	CGATGAAGGTCTTTGGAACGGTA	23
ath-miR5665	0	0	0	0	0	0	0	0	0	0.0329179	0	0	0	0	0	0	0	0	TTGGTGGACAAGATCTGGGAT	21
ath-miR8166	0	0	0	0	0	0	0	0	0	0	0	0	0.0338668	0	0	0	0	0	AGAGAGTGTAGAAAGTTTCTCA	22
ath-miR8175	0.303058	0	0.0339315	0.251086	0.277726	0.133453	0.161982	0.185384	0	0.164589	0.312478	0.184941	0.237068	0.0914829	0.157918	0.0689339	0.13625	0	GATCCCCGGCAACGGCGCCA	20
ath-miR827	0	0	0	0	0	0	0	0	0	0	0	0	0	0	0.0315835	0	0	0	TTAGATGACCATCAACAAACT	21
ath-miR850	0	0	0	0	0	0	0	0	0	0	0	0	0	0	0	0.034467	0	0	TAAGATCCGGACTACAACAAAG	22
ath-miR856	0	0	0	0.0358695	0	0	0	0	0	0	0	0	0	0	0	0	0	0	TAATCCTACCAATAACTTCAGC	22
ath-miR858b>pab-miR858b	2.02039	1.56631	12.5207	5.09346	12.5671	15.0135	5.41019	1.70553	2.04417	21.4295	13.2282	12.65	16.2561	6.46479	4.70595	2.06802	0.783435	4.80775	TTCGTTGTCTGTTCGACCTTG	21
ath-miR869.2	0	0	0	0	0	0	0	0	0	0	0	0	0.0338668	0	0	0	0	0	TCTGGTGTTGAGATAGTTGAC	21
atr-miR171b>gma-miR171c-3p>gma-miR171o-3p>gma-miR171q>mdm-miR171m>mdm-miR171n>zma-miR171f-3p	0	0	0	0.0717389	0	0.10009	0.0647927	0	0	0.164589	0.0694396	0.110965	0.0677337	0.0914829	0.0315835	0.034467	0.238437	0.0658596	TTGAGCCGTGCCAATATCACA	21
atr-miR172>sbi-miR172b>tcc-miR172a	0	0	0.101795	0	0	0	0	0.0741536	0	0.0658357	0	0.0369882	0.0338668	0	0	0	0	0	GGAATCTTGATGATGCTGCA	20
atr-miR319a>atr-miR319c>cme-miR319b>cme-miR319a>ctr-miR319>gma-miR319a>gma-miR319b>gma-miR319e>lus-miR319b>mtr-miR319a-3p>mtr-miR319b-3p>pab-miR319a>pab-miR319b>pab-miR319c>pab-miR319f>pab-miR319g>pab-miR319i>pab-miR319k>pab-miR319l>pab-miR319m>pab-miR319n>ppe-miR319a>ptc-miR319a>ptc-miR319b>ptc-miR319c>ptc-miR319d	0	1.42061	2.78239	0	0	0	40.7222	0.259538	0.0511043	0.526686	0	1.2576	0.0677337	114.476	1.16859	20.3355	0	2.60145	TTGGACTGAAGGGAGCTCCC	20
atr-miR390.1	0.0336732	0.0364258	0.101795	0.0717389	0.0694315	0	0.129585	0.11123	0.102209	0.0658357	0.0347198	0.0739764	0	0	0.0315835	0.241269	0.170312	0.131719	TAAAGCTCAGGAGGGATAGCG	21
atr-miR396d	0	0	0	0	0	0	0	0	0	0	0	0	0	0	0.0315835	0	0	0	CTCCACGGCTTTCTTGAACTT	21
atr-miR397a	0.0673463	0.0364258	0	0	0	0	0.0323964	0.222461	0	0	0	0	0	0	0	0.172335	0.817497	0	TCCTTGAGTGCAGCGTTGATG	21
atr-miR397b	0.0336732	0	0.0678631	0.0358695	0	0	0.0323964	0.0741536	0	0	0	0	0	0	0	0.0689339	0.0340624	0.0658596	TCATTGAGTGCAGCGTTGGTG	21
atr-miR398	0	0	0	0	0	0	0.0323964	0.0741536	0.0511043	0	0	0	0.0338668	0	0	0.034467	0.0340624	0.0658596	TGTGTTCCCAGGTCGCCCCTG	21
atr-miR8553a	0	0.0364258	0	0	0	0	0	0	0	0	0	0	0	0	0	0	0	0	ATCGGGTGGTTCAGAATTCATATC	24
atr-miR8554	0	0	0	0	0.0347157	0	0	0	0	0	0	0	0	0	0	0	0	0	TGCGATGACTTTGGATCTTGAGGA	24
atr-miR8558b	0.134693	0.0728516	0.135726	0.107608	0.0694315	0.0667267	0.0971891	0.0370768	0.153313	0.0658357	0.0347198	0.0369882	0.0677337	0	0	0	0.0340624	0	TTTCCGATCCCGCCCATGCCGT	22
atr-miR8572	0	0	0	0	0	0	0	0	0	0	0	0	0.0677337	0	0	0	0	0	TGACCCGGTCGTTGGAATCCTCTC	24
atr-miR8588	0	0	0	0	0	0	0	0	0	0	0.0347198	0	0	0	0	0	0	0	CCGAGCTCCCAGGGTTAATGG	21
atr-miR8593	0	0	0	0	0	0.0333634	0	0	0	0	0	0	0	0	0	0	0	0	TCTTAGCTTGTCCTAAAAGGCATG	24
bcy-miR156>bgy-miR156	0.976522	0.145703	2.13769	1.04021	2.4301	0.934174	1.16627	0.593229	0.0511043	2.37009	0.0694396	0.0369882	0.677337	2.98844	1.70551	0.551471	3.20186	2.00872	TTTGACAGAAGATAGAGAGCAC	22
bdi-miR1127	0.404078	0.327832	0.373247	0.0358695	0.347157	0.366997	0.0971891	0.185384	0.204417	0.230425	0.104159	0.110965	0.101601	0.182966	0.252668	0.241269	0.306561	0.164649	AACTACTCCCTCCGTCCGATA	21
bdi-miR1135	0	0	0.0339315	0	0	0	0	0	0	0	0	0	0	0	0	0	0	0	TTTCGACAAGTAATTCCGACCGGA	24
bdi-miR156a>far-miR156a>gma-miR156b>mtr-miR156a>osa-miR156k>rco-miR156e>sbi-miR156d>tcc-miR156a>zma-miR156j-5p	0.0673463	0	0.101795	0	0	0.0333634	0.0323964	0.0370768	0.153313	0	0.0694396	0.0369882	0	0	0.0947506	0.034467	0	0.0987894	TGACAGAAGAGAGAGAGCACA	21
bdi-miR156b-3p	0.134693	0.0728516	2.40914	1.61413	3.78401	0.133453	0.421153	0.11123	0	0	0.486077	0.480847	0.474136	0	0.315835	0.103401	0.0340624	0	GCTCACTTCTCTCTCTGTCACC	22
bdi-miR156e-3p>osa-miR156c-3p>osa-miR156g-3p	6.19586	3.75186	5.25939	6.85107	8.19291	12.6114	12.0838	10.0478	7.71675	9.5791	7.39532	11.2074	6.19763	15.1862	11.2122	4.10157	7.66404	6.45424	GCTCACTTCTCTCTCTGTCAGC	22
bdi-miR159a-3p	0	3.56973	0.101795	3.73042	3.36743	3.90351	0.0323964	108.227	0	4.87184	3.8539	143.847	0.508003	0.152471	0.0315835	0.965075	0.544998	1.48184	CTTGGATTGAAGGGAGCTCT	20
bdi-miR159a-5p	0.0336732	0.0728516	0	0.143478	0.104147	0.166817	0.0647927	0.11123	0.153313	0	0	0	0	0	0.252668	0	0.0681248	0.0658596	AGCTCCCTTCGATCCAATC	19
bdi-miR159b-3p.1>far-miR159>hvu-miR159b>hvu-miR159a>osa-miR159a.1>osa-miR159b>sbi-miR159a>sof-miR159a>sof-miR159b>sof-miR159d>ssp-miR159a>tae-miR159a>tae-miR159b>zma-miR159a-3p>zma-miR159b-3p>zma-miR159f-3p>zma-miR159j-3p>zma-miR159k-3p	204.261	47.39	56.4621	78.6259	52.3166	600.14	30.1286	40.08	39.7592	77.8837	698.702	90.3622	88.5279	618.15	751.752	46.1857	15.6006	18.309	TTTGGATTGAAGGGAGCTCTG	21
bdi-miR159b-3p.2	0	0	0	0	0	0	0	0	0	0	0	0	0	0	0	0	0	0.0329298	ATCCACCCCTTGCCGACCGCTG	22
bdi-miR159b-5p.1>zma-miR159a-5p	0	0	0	0	0	0	0	0	0	0	0	0	0	0	0	0	0	0.0658596	GAGCTCCTATCATTCCAATGA	21
bdi-miR159c	0	0	0	0	0	0.0333634	0	0	0	0	0	0	0	0	0	0	0	0	TTTGGTTTGAAGGGGGCTCTG	21
bdi-miR160f>cas-miR160a>cas-miR160b-5p>gma-miR160b>gma-miR160c>gma-miR160d>gma-miR160e>htu-miR160a	2.7612	0	0	0	0	0.600541	0	0	1.2265	0.0329179	0.555517	0.0739764	2.06588	0.0304943	0	0.551471	0.0340624	2.07458	TGCCTGGCTCCCTGTATGCC	20
bdi-miR162>pab-miR162a	0	0	0	0	0	0	0	0	0	0	0.0347198	0	0	0	0	0	0	0	TCGATAAACCTCTGCATCCGG	21
bdi-miR166e-3p	3.2663	1.2749	46.2487	0.322825	0.48602	0.467087	1.71701	32.1456	0.868773	1.61298	0.729116	1.07266	0.64347	0.823346	0.789589	23.2997	26.5687	21.3714	CTCGGACCAGGCTTCATTCCC	21
bdi-miR169i	0.0336732	0	0	0	0	0	0	0	0	0	0	0	0	0	0	0	0	0	CCAGCCAAGAATGGCTTGCCTA	22
bdi-miR171f	0	0.0364258	0.0339315	0	0.0347157	0	0	0.0741536	0	0	0	0	0	0.0304943	0	0	0.0340624	0	TGAGCCGAACCAATATCACCC	21
bdi-miR172d>ghr-miR172>mtr-miR172a	0.0673463	0	0.0678631	0.107608	0	0.0333634	0.0647927	0	0	0	0	0.0369882	0.0677337	0	0	0	0	0	AGAATCCTGATGATGCTGCAG	21
bdi-miR319b-3p	0.0336732	0	0	0	0.312442	0.0667267	0.0971891	0	0.102209	0	0	0.110965	0.135467	0	0.221085	0	0	0.0987894	TTGGACTGAAGGGTGCTCCCT	21
bdi-miR319b-5p>mtr-miR319d-5p	0	0	0	0	0	0	0	0	0	0.0329179	0	0	0	0	0	0	0	0	AGAGCTCTCTTCAGTCCACTC	21
bdi-miR393a>bdi-miR393b-5p>bna-miR393>cme-miR393a>cme-miR393b>cme-miR393c>csi-miR393c-5p>fve-miR393a>gma-miR393a>lus-miR393a>lus-miR393b>lus-miR393c>lus-miR393d>mes-miR393a>mtr-miR393a>mtr-miR393b-5p>osa-miR393a>ppe-miR393b>ptc-miR393a-5p>ptc-miR393b-5p>ptc-miR393c>rco-miR393>sbi-miR393a>sbi-miR393b>tcc-miR393b>vca-miR393-5p>vvi-miR393b>vvi-miR393a	0	0.0364258	0	0	0	0	0.0323964	0	0	0	0	0	0	0	0	0	0	0	TCCAAAGGGATCGCATTGATC	21
bdi-miR397b-5p>lus-miR397a	0	0	0	0	0	0	0.0647927	0	0.0511043	0	0	0	0	0	0	0.137868	0.0340624	0.428087	ATTGAGTGCAGCGTTGATGAA	21
bdi-miR398b	0	0	0.0339315	0	0	0	0	0	0	0	0	0	0	0	0	0	0	0	CAGGAGTGTCACTGAGAACACA	22
bdi-miR399a	0	0	0	0	0	0.0333634	0	0	0	0	0	0	0	0	0	0	0	0	TGCCAAAGGAGAATTACCCTG	21
bdi-miR408-3p>cpa-miR408>dpr-miR408>osa-miR408-3p>rco-miR408>sbi-miR408>sof-miR408a>sof-miR408b>sof-miR408c>sof-miR408d>ssp-miR408d>ssp-miR408a>tae-miR408>zma-miR408a>zma-miR408b-3p	0.168366	3.42403	4.78435	0.286956	0.173579	3.0027	7.0948	0.11123	0.35773	0.230425	0	2.70014	1.76108	2.86646	0.0315835	0.034467	0.374686	0.0329298	CTGCACTGCCTCTTCCCTGGC	21
bdi-miR5059	0	0	0	0	0	0	0	0	0	0	0	0	0	0.0304943	0	0	0	0	CGGCCTGGGCAGCACCACCA	20
bdi-miR5166	0	0	0	0.0358695	0	0	0	0	0	0	0	0	0	0	0	0	0	0	TGCCCACCAGGGTTCGATCCA	21
bdi-miR5171a>bdi-miR5171b	0	0	0	0	0	0	0	0	0	0	0	0.0369882	0.0338668	0	0	0	0	0	ACTTAATATGGGACGGAAGAA	21
bdi-miR5174c-3p	0	0.0728516	0	0	0	0	0	0	0	0	0	0	0	0	0	0	0	0	CAATTTTGCGTGGAACTGAGGGAG	24
bdi-miR5174d-3p	0.101019	0.109277	0.0678631	0.143478	0.104147	0.133453	0.0323964	0.0370768	0	0.0658357	0.138879	0.0739764	0	0.0304943	0.0947506	0.0689339	0	0.0329298	CAATCTTTATGGAACGGAGAGAGT	24
bdi-miR5174d-5p	0	0	0	0	0	0.0333634	0	0	0	0	0	0	0	0	0	0	0	0	TCCCTCCGTTTCATAAAGATTGGC	24
bdi-miR5174e-3p.1>bdi-miR5174b-3p	0	0	0	0	0	0	0	0	0	0	0	0	0	0.0304943	0	0	0	0	CAACCTTTATGGAACGGAGGG	21
bdi-miR5174e-3p.2	0.707136	0.291406	0.271452	0.502173	0.347157	0.266907	0.323964	0.259538	0.306626	0.0987536	0.0694396	0.0739764	0.609603	0.487909	0.252668	0.413603	0.238437	0.263438	TTTATGGAACGGAGGGAGTAG	21
bdi-miR5174e-5p.2	0.101019	0.145703	0.203589	0.143478	0.138863	0.166817	0.0647927	0.0370768	0	0.0329179	0.0694396	0.147953	0.0677337	0.0304943	0.0315835	0.0689339	0.0340624	0.0329298	TACTCCCTCTGTTCCATAAAG	21
bdi-miR5185a-3p>bdi-miR5185b-3p>bdi-miR5185c-3p>bdi-miR5185d-3p>bdi-miR5185e-3p>bdi-miR5185f-3p>bdi-miR5185g-3p>bdi-miR5185h-3p>bdi-miR5185i-3p>bdi-miR5185j-3p>bdi-miR5185k-3p	0	0	0	0.0358695	0	0	0	0	0	0	0	0	0	0	0	0	0	0	TTTGAGAATTGAACTAGAAGC	21
bdi-miR529-3p>zma-miR529-3p	0	0	0	0	0	0	0	0	0	0	0	0	0	0.0304943	0	0.0689339	0.0340624	0	GCTGTACCCTCTCTCTTCTTC	21
bdi-miR530a>bdi-miR530b	0.0336732	0.0364258	0	0	0	0	0	0	0	0	0	0	0	0	0	0	0	0	TGCATTTGCACCTGCACCTAC	21
bdi-miR531	0	0	0.0339315	0	0	0	0	0	0	0	0	0	0	0	0	0	0	0	GATGCTCGCCGGAGCAGCGTGCTG	24
bdi-miR7711-3p.4	0.0673463	0.0364258	0.0339315	0.0358695	0	0	0	0.0370768	0	0.0329179	0	0.147953	0.0338668	0.0609886	0	0	0	0	TATCCTAGCCATAAAATTCAGTAT	24
bdi-miR7713-5p	0	0	0.0339315	0	0	0	0	0	0	0	0	0	0	0	0	0	0	0	TAGGAATTGATGGAACAGCTCACA	24
bdi-miR7714-3p	0	0	0	0	0	0	0	0	0	0	0	0	0.0338668	0	0	0	0	0	CTAATATGTATCGAAGGGAGTAGC	24
bdi-miR7739-5p	0	0	0	0	0	0	0	0	0	0	0	0	0	0.0304943	0	0	0	0	AGATGCGTCGAAGCGGACTGGATC	24
bdi-miR7766-3p	0	0	0	0.0358695	0	0	0	0	0	0	0.0694396	0	0	0	0	0	0	0	CGAGGCTGACTGGGACTAAGCGGC	24
bdi-miR7767-5p	0	0	0	0	0.0347157	0	0	0	0	0	0	0	0	0	0	0	0	0	CCCCAAGCTGAGAGCTCTCCC	21
bdi-miR7768a-3p>bdi-miR7768b-3p	0.0336732	0	0	0	0	0	0	0	0	0	0	0	0	0	0	0	0	0	CGGCGCCGTCCTCGACCGGGAG	22
bdi-miR7779-3p	0.0336732	0	0	0	0	0	0	0	0	0	0.0347198	0	0	0	0	0	0.0340624	0	TTCTCGATCTGTAGACCGATCTAG	24
bdi-miR7782-3p	0.505097	0.218555	0.814357	0.143478	0.208294	0.30027	0.35636	0.185384	0.255522	0.296261	0.243039	0.369882	0.304802	0.304943	0.410586	0.413603	0.340624	0.329298	ACCTGCTCTGATACCATGTTGTGA	24
bdi-miR7782-5p	0	0	0	0	0	0	0	0	0	0	0	0	0	0.0304943	0	0	0	0	GCGGCATGGTATTAGAGCAAGTTG	24
bdi-miR7784a-5p>bdi-miR7784b-5p	0	0	0	0	0	0	0	0	0	0	0	0	0	0	0	0	0.0340624	0	GTACATGAACTTATAAGACGAGTA	24
bdi-miR845	0	0.0364258	0.0339315	0.0358695	0.0347157	0.0667267	0.0647927	0.0370768	0.0511043	0.0987536	0	0.0739764	0.135467	0.0304943	0.0315835	0.0689339	0	0.0329298	TGCTCTGATACCAATTGTTGG	21
bdi-miR9485	0	0	0	0	0	0	0	0	0	0.0658357	0	0	0.0338668	0	0	0	0	0	TTATGACGTGTAGGAGTTGCA	21
bdi-miR9493	0	0	0	0	0	0	0	0	0	0	0	0.0369882	0	0	0	0	0	0	AAGAATTATGAAACGAAGGGAGTA	24
bna-miR156a>hvu-miR156a>hvu-miR156b>rco-miR156a>rco-miR156b>rco-miR156c>rco-miR156d>ssl-miR156>ssp-miR156>tae-miR156	0.909175	0.509961	0.746494	2.5826	0.48602	1.43462	0.809909	1.48307	3.62841	0.888782	0.381918	43.6461	71.9332	40.8928	1.38968	2.34375	0.71531	1.05375	TGACAGAAGAGAGTGAGCACA	21
bna-miR167a>bna-miR167b	0.942849	9.61641	17.1694	13.2	7.81104	0.233544	0.226775	10.0849	19.4707	24.8201	8.15916	13.3158	12.8355	11.0084	0	0.275736	0.102187	10.2082	TGAAGCTGCCAGCATGATCTAA	22
bna-miR167d>fve-miR167b>fve-miR167c>fve-miR167a>gma-miR167l>lja-miR167a>lja-miR167b>lja-miR167c>mes-miR167b	0	0	0	0	0.138863	0.0667267	0	0	0	0.0329179	0.277759	0	0.0677337	0.0609886	0	0	0	9.78015	TGAAGCTGCCAGCATGATCT	20
bna-miR168b	0.538771	0.69209	0.916152	0.538042	0.590167	0.50045	0.453549	0.81569	0.408835	0.427932	0.624957	1.2576	0.474136	0.121977	0.473753	0.275736	0.408749	0.658596	TCGCTTGGTGCAGGTCGAGAA	21
bna-miR171g>cas-miR171a-3p	0	0	0	0	0	0.0667267	0	0	0	0	0	0.0739764	0	0	0	0	0	0	TGATTGAGCCGCGCCAATATCT	22
bna-miR2111c>bra-miR2111-5p	0	0	0	0	0	0	0	0	0.102209	0	0	0	0	0	0	0	0	0	TAATCTGCATCCTGGGGTTTA	21
bna-miR397a>bna-miR397b	0.101019	0.0728516	0.203589	0	0	0.133453	1.32825	0.185384	1.27761	0.197507	0.0694396	0.0369882	0.0677337	0.0304943	0.0631671	0.172335	0.85156	0.0987894	TCATTGAGTGCAGCGTTGATGT	22
bna-miR6035	0.0336732	0	0	0	0	0	0	0	0	0	0	0	0	0	0	0	0	0	TGGAGTAGAAAATGCAGTCGT	21
bra-miR164e-3p	0.0673463	0.0364258	0	0	0.0347157	0	0.0971891	0	0.102209	0	0.0347198	0	0	0	0	0	0.0340624	0	CACGTGCTCCCCTCCTCCAAC	21
bra-miR164e-5p	20.8437	216.697	165.213	332.618	380.936	773.663	148.699	0.444922	124.081	331.384	273.87	309.591	153.552	0.274449	198.029	75.9652	166.667	4.84068	TGGAGAAGCAGGGCACGTGCAA	22
bra-miR168b-5p>bra-miR168c-5p>nta-miR168a>nta-miR168b>nta-miR168c>sly-miR168a-5p>sly-miR168b-5p	0.505097	18.7957	0.271452	0.0358695	5.55452	0.667267	30.8089	0.593229	0.459939	24.1288	24.408	23.1916	0.0677337	0.518403	0.0315835	0.585938	1.83937	0.395158	TCGCTTGGTGCAGGTCGGGAC	21
bra-miR172c-5p	0	0	0	0.0358695	0	0	0	0	0	0	0	0	0	0	0	0	0	0	GCATCATCATCAAGATTCAGA	21
bra-miR390-3p	0	0.0364258	0	0	0.0347157	0	0.0323964	0.0370768	0	0	0	0.0369882	0	0	0	0.034467	0	0	CGCTGTCCATCCTGAGTTTCA	21
bra-miR403-5p	0	0.0364258	0	0.0358695	0	0.0333634	0	0.0370768	0	0	0.138879	0	0	0	0	0	0	0	TGTTTTGTGCGTGAATCTAATT	22
bra-miR408-3p	0	0	0	0.0358695	0	0	0	0	0	0	0	0	0	0	0	0	0	0	TGCTTGTTCCCTGTCTCTCTC	21
bra-miR408-5p	0	0	0	0	0	0	0	0.0741536	0	0	0.0347198	0	0	0	0	0	0	0	GGGAGCCAGGGAAGAGGCAGT	21
bra-miR9560b-3p	0	0	0	0	0.0347157	0	0	0	0	0	0	0	0	0	0	0	0	0	TCATATTAGTTCTACCTCCTGCTG	24
cas-miR156g	0.0336732	0	0	0	0.694315	0	0	0	0	0	0.381918	0	0	0	0.252668	0	0	0	GACAGAAGAGAGTGAGCAC	19
cas-miR156i	0	0	0	0	0	0	0	0	0	0	0.0347198	0	0	0	0	0	0	0	CAGAAGAGAGAGAGCACAAT	20
cas-miR157d	0	0	0	0.0717389	0.0347157	0.0667267	0	0	0	0.0329179	0	0	0	0	0	0	0	0	CAGAAGATAGAGAGCACTGA	20
cas-miR162a>gma-miR162a>zma-miR162-3p	0	0	0	0	0	0	0	0	0	0.0329179	0	0	0	0	0	0	0	0	TCGATAAACCTCTGCATCCA	20
cas-miR166c-3p>cas-miR166d>cas-miR166f-3p	1219.07	102.32	1314.24	808.821	1278.82	119.374	49.8256	1064.7	61.1208	979.537	91.1742	132.233	57.3704	864.117	61.9985	43.8075	55.9986	65.6291	TCGGACCAGGCTTCATTCCCCT	22
cas-miR166e>csi-miR166f-3p>osa-miR166m	0.336732	249.59	373.518	264.86	464.566	45.7745	232.541	314.523	244.279	0.526686	431.845	0.813741	193.955	292.013	279.104	137.385	182.949	207.326	TCGGACCAGGCTTCATTCCCT	21
cas-miR394	34.2119	0.619239	0.610768	0.251086	1.49278	0.366997	0.161982	0.481998	0.408835	25.4784	22.3596	27.3713	0.64347	28.3902	0.758005	11.8566	0.613123	0.461017	TTTGGCATTCTGTCCACCTCC	21
cas-miR403	6.80198	33.1475	63.961	2.00869	3.67987	3.3697	2.6565	129.806	169.922	161.265	2.63871	87.884	68.3771	54.7372	52.8393	276.907	0.783435	180.488	TTAGATTCACGCACAAACTCGT	22
cca-miR156b	133.615	51.2875	83.5055	82.6791	50.9627	51.6799	91.4225	61.807	64.9025	94.8035	56.8016	46.0873	77.4873	78.0349	143.705	80.1357	78.9225	61.5129	TGACAGAAGAGAGTGAGCATA	21
cca-miR164>osa-miR164c	0.269385	0.400684	0.508973	0.609781	0.72903	0.667267	0.226775	0.148307	0.255522	0.757111	0.729116	0.554823	0.372535	0.42692	0.284252	0.034467	0.0681248	0.263438	TGGAGAAGCAGGGTACGTGCA	21
cca-miR390	0.235712	0.182129	0.237521	0.0358695	0.0347157	0.10009	0.161982	0.185384	0.255522	0.0329179	0.0347198	0.147953	0.0677337	0	0	0.0689339	0	0.164649	AAGCTCAGGAGGGATAGCGTC	21
cca-miR395a	0	0	0	0	0	0.0667267	0	0	0	0	0	0.0739764	0	0	0	0.034467	0	0	TTGAAGTGTTTGGGGGGACTC	21
cca-miR396a-3p	0.168366	0.0728516	0.135726	0.0358695	0.138863	0.0667267	0	0.148307	0.153313	0.0658357	0.277759	0	0.0338668	0.152471	0.252668	0.034467	0.13625	0.131719	GTTCAAGAAAGCTGTGGGAAA	21
cca-miR396b>lus-miR396d>zma-miR396g-5p>zma-miR396h	1.95304	1.05635	2.88418	1.7576	1.24977	1.50135	2.04097	2.03922	2.19749	2.37009	2.01375	1.18362	1.62561	1.25027	1.51601	1.41315	1.73718	2.10751	TCCCACAGCTTTATTGAACTG	21
cca-miR396c	0.0336732	0	0	0	0	0	0	0	0	0	0	0	0	0	0	0	0	0	TTCAAGAAAGCTGTGGGAAAA	21
cca-miR6108f	0	0	0	0	0	0	0	0	0	0	0	0	0	0.0304943	0	0	0	0	TATGGTGAGAAGGGTAAGAAG	21
cca-miR6117	0	0.0364258	0	0	0	0	0	0	0	0	0	0	0	0	0	0	0	0	GGTTAGGTTGATCGGGTTGAAGAC	24
cln-miR166>far-miR166>pta-miR166c	0	0.0364258	0	0	0	0.166817	0	0.0370768	0	0.0658357	0.0347198	0	0	0.0304943	0	0.034467	0.0340624	0.0329298	CCGGACCAGGCTTCATCCCAG	21
cme-miR156e>mtr-miR156g-5p>pab-miR156m>pab-miR156n>pab-miR156p>pab-miR156q>pab-miR156r>pab-miR156s>pab-miR156t>pab-miR156u>pab-miR156v>pab-miR156w	0	0.0364258	0.475042	0	0	0.333634	0.0647927	0	0.0511043	0.0329179	0.173599	0.184941	0.0338668	0.152471	0.252668	0.034467	0.170312	0.0329298	TTGACAGAAGATAGAGGGCAC	21
cme-miR156h>cme-miR156g>dpr-miR156a>hci-miR156b>ptc-miR156k>vvi-miR156a	0.101019	0.145703	0.101795	0.0358695	0.138863	0.0333634	0.0971891	0.0370768	0	0.0329179	0.0347198	0.0739764	0.0677337	0.182966	0	0.034467	0.0340624	0.131719	TGACAGAAGAGAGGGAGCAC	20
cme-miR156j	22.5273	6.15596	167.113	115.894	62.5925	5.97204	43.4111	38.3374	68.3265	18.1707	9.20075	5.25233	4.03015	16.2535	9.69615	6.30745	8.75403	8.43003	GTTGACAGAAGAGAGTGAGCAC	22
cme-miR159b>osa-miR159e	32.1915	0	0.44111	0.358695	26.4881	31.7619	0	0.11123	0.0511043	0.164589	0.208319	0.295906	0.0677337	0	0.221085	0.034467	0.102187	0.0329298	ATTGGATTGAAGGGAGCTCCT	21
cme-miR164b	0	0.0728516	0.0339315	0	0	0.0333634	0.0323964	0	0	0.0329179	0.0347198	0	0	0	0	0.034467	0	0.0329298	TGGAGAGGCAGGGCACATGCT	21
cme-miR166g>csi-miR166c-3p>gma-miR166p>gma-miR166q>gma-miR166r>gma-miR166s>gma-miR166t>sbi-miR166d>sbi-miR166c>sbi-miR166b>sbi-miR166a>sbi-miR166h>sbi-miR166i>sbi-miR166j>tcc-miR166b>zma-miR166h-3p>zma-miR166e>zma-miR166i-3p>zma-miR166f>zma-miR166g-3p>zma-miR166b-3p>zma-miR166c-3p>zma-miR166d-3p	0.101019	0	44.6878	51.6879	39.5412	0	0	0.185384	0	6.87983	0	38.0239	23.1649	0	5.84296	22.9895	0	0	TCGGACCAGGCTTCATTCCC	20
cme-miR166i	60.477	9.28858	17.0336	0.64565	14.407	15.7141	0.35636	10.7523	10.4764	16.9527	15.485	14.0925	9.34725	0.152471	11.907	0.206802	23.8096	6.65182	TCGGACCAGGCTTCATTCTC	20
cme-miR168	19.9682	0.509961	8.89006	2.54673	0.833177	15.4139	0.453549	0	0.562148	4.21349	4.44414	0.369882	15.1723	5.76342	1.26334	0	19.9606	0.461017	TCGCTTGGTGCAGGTCGGGA	20
cme-miR172a>gma-miR172c>lus-miR172e>lus-miR172i>mdm-miR172l>mes-miR172e>mes-miR172f>ppe-miR172d>ptc-miR172g-3p>ptc-miR172h-3p>rco-miR172>sly-miR172d>stu-miR172d-3p>vvi-miR172c	0.0336732	0.0728516	0	0	0.173579	0.30027	0	0.0741536	0.153313	0.0658357	0.243039	0.0739764	0.237068	0.64038	0.410586	0.0689339	0.0681248	0	GGAATCTTGATGATGCTGCAG	21
cme-miR172f	0.0336732	0	0	0	0.0347157	0.0333634	0	0	0	0	0	0	0	0	0	0	0	0	TGAATCTTGATGATGCCGCAC	21
cme-miR319c>cme-miR319d>gma-miR319c>ptc-miR319e>ptc-miR319f>ptc-miR319g>ptc-miR319h>stu-miR319b	2.66018	2.73194	0.0339315	51.3651	0.590167	4.40396	0.194378	0	0	3.58805	69.7521	2.40423	56.5576	50.468	0.157918	0.137868	0.0681248	0	TTGGACTGAAGGGAGCTCCT	20
cme-miR395b>cme-miR395c>mtr-miR395g	0	0	0	1.2913	0.0694315	0.366997	0	0	0.204417	0	0	0.147953	0	1.12829	0.0947506	0	0	0.0329298	TTGAAGTGTTTGGGGGAACTC	21
cme-miR399d>cme-miR399e>mdm-miR399k	0	0	0	0.0358695	0.0694315	0.0333634	0	0	0	0	0.0347198	0	0.0338668	0.0609886	0	0	0	0	TGCCAAAGGAGAGTTGCCCTT	21
cme-miR399f	0	0	0.0339315	0	0.0347157	0	0	0	0	0	0.0347198	0	0	0.0304943	0	0	0	0	TGCCAAAGGAGAATTGCAC	19
cme-miR530a>htu-miR530>lus-miR530a>lus-miR530b>mes-miR530a>ptc-miR530a>tcc-miR530b	0.101019	0	0.0339315	0.0358695	0	0	0.0647927	0	0	0.0329179	0	0	0	0	0.0315835	0	0.0340624	0	TGCATTTGCACCTGCACCTT	20
cme-miR845	0	0	0	0	0	0	0	0	0	0	0	0	0.0338668	0	0	0	0	0	TCGCTCTGATACCAATATGATG	22
cme-miR858	0.202039	0.0364258	0.101795	0.0358695	0	0.0333634	0.0971891	0.148307	0.0511043	0.197507	0.173599	0	0	0.152471	0	0.034467	0	0	TCTCGTTGTCTGTTCGACCTT	21
cpa-miR159b>mdm-miR159a>mdm-miR159b>pab-miR159b>pab-miR159c	0.202039	1.1292	0.0678631	1.21956	0.138863	0	0.0323964	0.407845	0.255522	0	0.486077	0.0369882	0.135467	0	0.221085	0.137868	0.102187	0.230509	CTTGGATTGAAGGGAGCTCC	20
cpa-miR166d>gma-miR166j-3p	39.0609	0.0364258	28.3668	28.8749	41.8672	40.9368	0.0323964	27.2144	23.508	0	39.8931	44.2009	28.6175	0	22.8981	0	27.6246	19.0993	TCGGACCAGGCTTCATTCCCG	21
cpa-miR172a>cpa-miR172b	0.572444	0.0364258	0.407179	0.0717389	0	0	0	0	0.102209	0.263343	0	0.184941	0	0.0304943	0.0315835	0	0	0	GGGAATCTTGATGATGCTGCA	21
cpa-miR319>mes-miR319f	0	0	0	0	46.5538	0	0	2.11338	2.14638	5.99105	2.32623	0.110965	0.846671	0.0304943	0	0.137868	0	0	ATTGGACTGAAGGGAGCTCC	20
cpa-miR477	0	0	0	0	0	0	0	0	0.0511043	0	0	0	0	0	0	0	0	0	ATTGGAGGACTTTGGGGGAGC	21
cpa-miR8142	0	0	0	0	0	0	0	0	0	0.0658357	0	0	0	0.0304943	0.0315835	0	0	0	TGAGGTAAGTAGACAGTAAAGGTT	24
cre-miR1150.3	0	0	0	0	0	0	0	0	0.0511043	0	0	0	0	0	0	0.034467	0	0	TGCAGCGGCGACTGGGGCCGA	21
cre-miR1151b-3p	0	0	0	0	0	0	0	0	0	0	0	0	0.0338668	0.0304943	0	0	0	0	ACGGGTTGTGGGACCCGGAC	20
crt-miR166a>mes-miR166h	0.673463	57.0428	0.373247	0.394564	0.520736	52.614	14.708	38.3374	23.8657	28.7373	0.624957	75.0121	0.270935	24.7309	34.4892	19.1981	12.8756	0.230509	TCGGACCAGGCTTCATTCCCGT	22
crt-miR166b	415.662	0.218555	0.746494	0.358695	82.9359	379.208	28.0876	0.444922	0.35773	406.272	0.763836	458.913	0.372535	34.55	0.505337	0.379136	0.476873	26.4426	TCGGACCAGGCTTCATTCCCTT	22
csi-miR156d-5p	0.0336732	0	0	0.215217	0.0347157	0.0667267	0	0	0	0.0658357	0	0.0739764	0	0.121977	0.0631671	0.034467	0.0340624	0	TGACAGAAGATAGAGAGCGC	20
csi-miR156e-5p	0.101019	0	0.0339315	0.215217	0	0.233544	0	0.0741536	0	0.0329179	0.0347198	0	0	0	0	0	0.0340624	0.0329298	GTGACAGAAGATAGAGAGCGC	21
csi-miR156f-5p	0.0336732	0	0	0.0358695	0	0	0.0323964	0	0	0	0	0.0739764	0.101601	0.0304943	0	0	0	0	ATGACAGAAGAGAGAGAGTAC	21
csi-miR156g-3p	0.505097	0.218555	0.916152	1.25543	0.694315	1.66817	1.39304	1.14938	0.919878	0.790029	0.763836	0.813741	0.609603	1.0673	0.663254	0.999542	0.647185	0.987894	GCTCTCTATTCTTCTGTCATC	21
csi-miR156g-5p	0.101019	0.0364258	0	0.0358695	0.0347157	0.0333634	0	0	0	0.0329179	0	0	0	0	0	0.0689339	0	0	TTGACGGAAGATAGAGAGCAC	21
csi-miR156i-5p	0.0336732	0	0	0.0717389	0.0694315	0.133453	0	0.0370768	0.153313	0	0	0	0.0338668	0.0304943	0.0315835	0	0.0340624	0.0658596	TTGACAGAAGATAGATAGCAC	21
csi-miR156j-5p>mtr-miR4414a-5p	5.0173	2.51338	5.83623	4.80651	4.75605	4.63751	2.23535	1.40892	0.919878	6.74816	6.04125	5.28931	2.06588	5.21452	3.75844	0.241269	0.204374	0.230509	AGCTGCTGACTCGTTGGTTCA	21
csi-miR159a-5p	0.0673463	0	0.0339315	0	0.104147	0.0667267	0	0.259538	0	0.164589	0	0	0	0	0	0	0.0340624	0.0658596	GAGCTCCTTGAAGTCCAAAAG	21
csi-miR159c-3p>ppt-miR319c>ppt-miR319d-3p>ppt-miR319e	22.662	23.094	17.5765	42.1825	29.2306	44.8737	9.55693	9.60289	54.5283	28.4081	150.788	181.945	128.254	49.8582	123.176	5.96278	5.92685	6.75061	CTTGGACTGAAGGGAGCTCCC	21
csi-miR160a-5p	0.0673463	0.0364258	0	0.0358695	0.0347157	0.0667267	0	0.0370768	0.204417	0.0987536	0	0.0739764	0.135467	0	0	0.034467	0.102187	0	GCCTGGCTCCCTGTATGCCAT	21
csi-miR160b-3p	0.134693	0.109277	0.169658	0.107608	0.104147	0.166817	0	0	0	0.0987536	0.104159	0.0369882	0	0.0304943	0.0631671	0.034467	0.0340624	0.0987894	GCGTACGAGGAGCCAAGCATA	21
csi-miR160b-5p>mes-miR160c>osa-miR160e-5p>zma-miR160f-5p	1.71733	1.31133	0.305384	3.12064	3.43686	0.266907	0.291567	0.92692	0.459939	2.33717	3.26366	1.36856	0.575736	0.365931	0.252668	2.48162	0.681248	1.58063	TGCCTGGCTCCCTGTATGCCG	21
csi-miR160c-5p	2.66018	4.04326	4.30931	2.47499	3.15913	3.63661	4.17913	4.44922	4.49718	2.43592	5.45101	3.92075	3.08188	4.29969	4.16903	1.68888	2.31624	2.73317	TGCCTGGCTCCCTGTATGCTT	21
csi-miR164a-3p	0.0336732	0	0.0678631	0.143478	0.138863	0.0333634	0.0971891	0	0	0.197507	0.104159	0.221929	0	0.121977	0.126334	0.137868	0.238437	0	CATGTGCCCTTCTTCCCCATC	21
csi-miR164b-3p>csi-miR164c-3p>csi-miR164d-3p	0	0	0.0339315	0	0	0	0	0	0	0	0	0	0	0	0	0	0	0	CACGCGCTCCCCTTCTCCAAC	21
csi-miR166a-3p>ctr-miR166>hbr-miR166b>lus-miR166i>lus-miR166k	11.5499	15.3353	10.892	8.78802	34.5769	1285.99	6.96522	8.34228	707.079	7.60403	1101.56	1288.6	42.4013	6.64776	6.15879	569.325	696.95	6.65182	TCGGACCAGGCTTCATTCCCCC	22
csi-miR166b-5p	0	0.291406	0	0.0358695	0.173579	0.166817	0	0.0370768	0.102209	0.0329179	0	0	0	0.0609886	0.157918	0	0.306561	0.296368	GGAATGTTGTTTGGCTCGAGGG	22
csi-miR166c-5p	0.101019	0	0.101795	0.0717389	0	0	0.0323964	0	0	0.0329179	0.104159	0	0	0	0.0631671	0	0.0681248	0	GGGAATGTTGTCTGGTTCGAG	21
csi-miR166f-5p	0	0.0364258	0	0	0	0	0.0323964	0	0	0	0.0347198	0	0	0	0	0	0	0	GGACTGTTGTCTGGCTCGATG	21
csi-miR166i-3p>csi-miR166k-3p	0.336732	0.291406	0.610768	0.322825	0.312442	0.433724	0.907098	0.704459	0.766565	0.493768	0.243039	0.332894	0.101601	0.152471	0.221085	0.206802	1.09	0.592736	TCTTGGACCAGGCTTCATTCC	21
csi-miR166j-3p	0.202039	0.145703	0.339315	0.322825	0.277726	0.366997	0.388756	0.259538	0.102209	0.164589	0.347198	0.110965	0.135467	0.0914829	0.284252	0.482537	0.408749	0.296368	TTGGACCAGGCTTCATTCCTC	21
csi-miR167b-3p>pab-miR167a	0.505097	0.145703	0.203589	0.179347	0.138863	0.10009	2.13816	2.26169	2.19749	0.197507	0	0.0739764	0.101601	0.152471	0.157918	1.99908	2.41843	1.97579	AGATCATGCGGCAGTTTCACC	21
csi-miR167d-3p	1.48162	0.546387	1.1876	1.11195	0.590167	1.10099	1.36065	0.778613	0.562148	1.08629	0.451358	0.517835	0.711204	1.00631	1.20017	1.06848	0.953747	0.757385	ATCGGATCATGTGGTAGCTTCACC	24
csi-miR171a>zma-miR171b-3p	0	0	0.0339315	0	0	0	0	0.148307	0	0	0	0	0	0	0.0315835	0.034467	0	0	TTGAGCCGTGCCAATATCAC	20
csi-miR171b-5p	0.0336732	0.145703	0	0	0	0	0.0971891	0.0741536	0	0.0329179	0	0	0	0.0304943	0	0	0	0	TGTGATATTGGTTCGGCTCATC	22
csi-miR171c-5p	0	0	0	0	0.0347157	0	0	0	0	0	0	0	0	0	0	0.034467	0.0340624	0.0987894	TGTTGGAACGGCTCAATCAAA	21
csi-miR172a-3p>gma-miR172f>lja-miR172b>lja-miR172c>mdm-miR172a>mdm-miR172b>mdm-miR172c>mtr-miR172d-3p>sbi-miR172c>sbi-miR172a>sbi-miR172d>zma-miR172a>zma-miR172d-3p>zma-miR172b-3p>zma-miR172c-3p	0.0673463	0	0	0.0717389	0.590167	0	0.0323964	0.444922	0.0511043	0.493768	0.381918	0.6288	0	0	0.473753	0.034467	0.374686	0.0987894	AGAATCTTGATGATGCTGCA	20
csi-miR172a-5p	0	0	0	0	0	0	0	0	0	0	0	0	0.0338668	0	0	0	0	0	GCAGCGTCCTCAAGATTCACA	21
csi-miR172c-3p	0.0336732	0	0.101795	0.286956	0.0694315	0	0.194378	0	0	0	0	0.0369882	0	0	0.0315835	0	0.0340624	0	TGGAATCTTGATGATGCTGCAG	22
csi-miR2111-5p>ptc-miR2111a>ptc-miR2111b	0	0	0	0	0	0	0	0.0370768	0	0	0	0	0	0	0	0.034467	0	0.0658596	TAATCTGCATCCTGAGGTTTG	21
csi-miR390b-5p>gma-miR390e	0.303058	0.145703	0	0	0.0347157	0	0	0.185384	0	0	0	0	0	0	0	0	0	0.131719	AGCTCAGGAGGGATAGCGCC	20
csi-miR393a	0	0	0	0.0358695	0	0.0333634	0	0	0	0	0	0	0	0	0	0	0	0	ATCCAAAGGGATCGCATTGATC	22
csi-miR393b-5p>gma-miR393h>gma-miR393i>gma-miR393j>gma-miR393k	0	0.0364258	0	0	0.0347157	0.0333634	0	0.0370768	0.0511043	0	0	0	0	0.0304943	0	0	0	0.164649	TTCCAAAGGGATCGCATTGATC	22
csi-miR393c-3p>gma-miR393c-3p>mdm-miR393g>mdm-miR393h>ptc-miR393a-3p>ptc-miR393b-3p	0	0.0728516	0.101795	0	0.0694315	0.0667267	0.485945	0.444922	0.306626	0	0	0	0	0	0.0315835	0.241269	0.170312	0.0987894	ATCATGCTATCCCTTTGGATT	21
csi-miR3951b-5p	0	0	0	0	0	0	0	0	0	0	0.0694396	0	0	0	0	0	0	0	CAGGTAAAGATGAGAGAAAAA	21
csi-miR396a-3p	5.5224	3.09619	6.61665	6.24129	6.94315	5.23805	3.91996	3.63353	4.03724	5.79354	5.17325	3.58786	4.80909	5.91589	6.37988	1.44761	1.15812	1.44891	ATTCAAGAAAGCTGTGGAAAA	21
csi-miR396e-5p	0.471424	0.218555	0.0678631	0.538042	0.0694315	0	0	0.148307	0.459939	0	0.208319	0.0369882	0	0.335437	0.347419	0	0.0681248	0	TTCCACGGCTTTCTTGAACT	20
csi-miR396f-3p>gma-miR396b-3p>gma-miR396k-3p>mtr-miR396a-3p	0	0	0.0339315	0	0	0	0	0	0	0	0	0	0	0	0	0	0	0.0329298	GCTCAAGAAAGCTGTGGGAGA	21
csi-miR399f-3p>tcc-miR399e	0	0	0.0339315	0.0358695	0.104147	0.0333634	0	0	0.0511043	0.0658357	0	0	0.0338668	0.0609886	0.0315835	0.137868	0	0.0329298	CGCCAAAGGAGAATTGCCCTG	21
csi-miR403b-5p	0.202039	0.0364258	0.169658	0.215217	0.208294	0.0667267	0.161982	0.296614	0.35773	0.395014	0.416638	0.258917	0.0338668	0.121977	0.126334	0.103401	0.102187	0.164649	AGTTTGTGCGTGAATCTAACC	21
csi-miR477b-5p	0	0	0	0	0	0.0333634	0	0	0	0.0329179	0	0.0369882	0	0	0	0	0	0	CTCTCCCTCAAGGGCTTCTCT	21
csi-miR477c-3p	0	0.0364258	0	0	0	0	0	0	0	0	0	0	0	0	0	0	0	0	GAAGTCCTTGGGGTTGAGTGA	21
csi-miR477c-5p	0.0336732	0	0.135726	0	0	0	0	0	0	0	0	0	0.0338668	0	0	0	0	0	ACTCTCCCTCAAGGGCTTCGC	21
csi-miR477d-5p	0	0	0.0678631	0	0	0	0	0.0741536	0	0	0	0	0	0	0	0	0	0	ACTCTCCCTCAAGGGCTTCTGG	22
csi-miR477e-5p>lja-miR477-5p	0	0	0.0339315	0	0.0347157	0	0	0	0	0.0329179	0	0	0	0	0	0	0	0	ACTCTCCCTCAAGGGCTTCTGA	22
csi-miR530a-5p	0	0	0	0	0	0.0667267	0	0	0	0	0	0	0.101601	0.0914829	0	0	0	0	TGCATTTGCACCTGCACCTTG	21
csi-miR858-3p>ppe-miR858	0.0673463	0.0728516	0.0339315	0.107608	0.138863	0.20018	0	0	0.153313	0.0329179	0.243039	0.0369882	0.237068	0	0.126334	0.0689339	0	0.0329298	CTCGTTGTCTGTTCGACCTTG	21
cst-miR11333	0	0	0.0339315	0	0	0	0	0	0	0	0	0	0	0	0	0	0	0	ACTTCGCGGTAAGTCTAACCCTAATT	26
dpr-miR160>ppt-miR160g	0.0336732	0.0728516	0.135726	0.0717389	0.104147	0.133453	0.0971891	0.0370768	0.102209	0.131671	0.173599	0.221929	0.0338668	0.0609886	0.0631671	0.206802	0.0681248	0.0329298	TGCCTGGCTCCTTGTATGCCA	21
dpr-miR397>ptc-miR397b	0	0	0.0339315	0	0.0694315	0	0.550738	0	0.35773	0	0	0	0	0	0	0.034467	0.102187	0.0658596	CCATTGAGTGCAGCGTTGATG	21
egu-miR172d>egu-miR172e>egu-miR172f>osa-miR172c>sbi-miR172e	0.168366	0.0728516	0.542905	0.215217	0.24301	0.333634	0.226775	0.296614	0.153313	0.46085	0.208319	0.110965	0.0677337	0.274449	0.568504	0.103401	0.0681248	0.164649	TGAATCTTGATGATGCTGCAC	21
eun-miR10212-5p	0	0	0	0	0.0347157	0	0	0	0	0	0	0	0	0	0	0	0	0	CGAAAAATGATTGGTTGTATCGCT	24
eun-miR10219-3p	0	0.0364258	0.0339315	0	0	0	0	0	0	0	0	0	0	0	0	0	0	0	TGGAGGTTGTTTGGCTTGAGCT	22
eun-miR10223-3p	0	0	0	0	0	0	0	0	0	0	0.0694396	0	0	0	0	0	0	0.0329298	TCTCGTTCCGCTTCATCTGAA	21
eun-miR159-5p	0.0336732	0	0	0	0.104147	0.0333634	0.0971891	0	0	0.0987536	0.0694396	0.0369882	0	0	0.0315835	0	0.102187	0.0329298	AGCTGCTGGTCTATGGATCCC	21
eun-miR160-3p>gma-miR160a-3p>stu-miR160a-3p	2.92957	1.89414	2.54487	1.65	1.04147	1.86835	3.07765	3.96722	5.05933	3.81847	2.56927	2.36725	1.55787	2.19559	1.98976	8.1342	8.89028	7.83729	GCGTATGAGGAGCCAAGCATA	21
eun-miR167c-3p	0	0	0	0	0	0	0	0	0	0	0	0	0	0	0	0	0.0681248	0.0329298	ATCAGATCATGTGGCAGCTTCACC	24
eun-miR167c-5p	0.134693	0.0364258	0.0339315	0	0.0347157	0.0333634	0.161982	0.0370768	0.0511043	0.0658357	0	0.0369882	0.0338668	0.0609886	0.0631671	0	0.102187	0.0658596	TGAAGCTGCCAGCGTGATCTCA	22
eun-miR172a-5p	0	0	0	0	0	0	0	0	0	0	0	0	0	0.0304943	0	0	0	0	CAGGTGTAGCATCATCAAGAT	21
eun-miR172c-5p>mtr-miR172c-5p	0.370405	0.327832	0.339315	0.932606	0.416589	0.900811	0.323964	0.556152	0.459939	0.822947	0.694396	0.110965	0.474136	0.335437	0.97909	0.482537	0.408749	0.625666	GTAGCATCATCAAGATTCACA	21
eun-miR395-3p>gma-miR395i>gma-miR395j>gma-miR395k>gma-miR395l>gma-miR395m>mtr-miR395a>mtr-miR395c>mtr-miR395d>mtr-miR395e>mtr-miR395f>mtr-miR395i>mtr-miR395j>mtr-miR395l>mtr-miR395m>mtr-miR395n>mtr-miR395o>sbi-miR395f	0	0.546387	1.15367	0	0.24301	0	0.907098	0	1.32871	1.31671	1.87487	1.14663	0.0338668	0	0.126334	0	0.0340624	0.526877	ATGAAGTGTTTGGGGGAACTC	21
eun-miR397a-5p	0.101019	0	0.0339315	0.215217	0	0	1.26346	0.185384	0.0511043	0	0	0	0	0.152471	0.0315835	0.241269	0	0.0987894	TCATTGAGTGCAGCGTTGAT	20
eun-miR397b-3p	0	0.0364258	0.0339315	0	0	0	0	0	0	0	0	0	0	0	0	0	0	0	TCAACGCTGCACTCAATGATG	21
eun-miR397b-5p	0	0	0	0	0	0	0.0647927	0	0	0	0	0.0369882	0	0	0	0	0	0	TGCAGCGCTGTCGAAACCGAT	21
eun-miR482b-3p	0.0336732	0.0364258	0	0.0358695	0	0.0667267	0.0323964	0.11123	0	0	0.0694396	0.0369882	0.0338668	0.0304943	0.0315835	0	0.0340624	0.0329298	TTTCCTATTCCTCCCATTCCAT	22
eun-miR535b-3p	0	0	0	0	0.0347157	0	0	0	0	0	0	0	0	0	0	0	0	0	TGCTCTCTACCGTTGTCATG	20
far-miR164a>far-miR164b	0.336732	0.400684	1.32333	0.573912	1.90936	0.50045	0.161982	0.333691	0.511043	0.329179	0.798556	0.554823	0.508003	0.945323	0.379003	0.0689339	0.102187	0.0987894	TGGAGAAGCAGGGCACTTGCT	21
fve-miR11303	0	0	0	0	0.0347157	0	0	0	0	0	0	0	0	0	0	0	0	0	TCAAACATCACTGCAGCTGTA	21
fve-miR11305	0	0.0364258	0	0	0	0	0	0	0	0	0	0	0	0	0	0	0	0	TTTTGGTCCGAATCCGAGCTCC	22
fve-miR11313	0	0	0	0.0358695	0	0	0	0	0	0	0	0	0	0	0	0	0	0	GAAAAGAATGGACTCTCCGGGG	22
fve-miR1511	94.3185	57.9899	78.7551	56.6738	4.09646	54.1154	54.4583	12.4949	3.78172	0.164589	46.6634	5.25233	9.68591	12.6551	42.3535	29.159	20.9824	22.7545	ACCTAGCTCTGATACCATGTG	21
fve-miR156b>fve-miR156a>fve-miR156c>fve-miR156e>gma-miR156k>gma-miR156n>gma-miR156o	0	8.66934	4.98794	6.3489	40.0967	10.6429	106.292	26.6582	1.89086	3.25887	76.3489	6.10305	14.0547	5.64144	12.0965	21.4384	105.696	22.2276	TTGACAGAAGAGAGTGAGCAC	21
fve-miR156h	1.11121	27.5379	1.42512	1.50652	1.07619	1.23444	0.907098	0.593229	26.2165	1.25088	0.798556	20.3435	1.01601	1.25027	1.86343	0.482537	0.408749	0.329298	TGACAGAAGAGAGTGAGCTC	20
fve-miR156j	0.168366	0.327832	0.203589	0.143478	0.173579	0.10009	0.259171	0.222461	0.153313	0.263343	0.208319	0.147953	0.101601	0.365931	0.157918	0.137868	0.170312	0.164649	TTGACGGAAGAGAGCGAGCAC	21
fve-miR159a-5p	4.17547	2.76836	4.58076	3.08477	4.51304	4.40396	2.30014	4.33799	2.75963	6.22148	4.96493	4.10569	2.20134	3.96426	3.28469	4.92877	3.57655	3.72107	GAGCTCCTTGAAGTCCAATAG	21
fve-miR159b	0.437751	0.400684	177.157	0.717389	0.416589	0.867448	0.291567	0.667382	0.817669	0.888782	0.520797	0.221929	1.21921	0.518403	1.42126	0.275736	56.7479	0.296368	ATTGGATTGAAGGGAGCTCTC	21
fve-miR159c	0.168366	21.4912	0	0.251086	0.138863	0.366997	2.23535	0.0741536	1.94196	0.0987536	0.104159	0.147953	0.0677337	0.0914829	29.2779	6.20405	0	0.0329298	ATTGGATTGAAGGGAGCTCCC	21
fve-miR164a-3p>pab-miR164a	1.751	2.03985	2.61273	1.00435	1.90936	1.76826	2.88328	2.70661	2.29969	1.58006	1.66655	2.25628	0.778937	0.609886	0.758005	2.17142	3.33811	2.70024	CACGTGCTCCCCTTCTCCAAC	21
fve-miR164c>mes-miR164d>mtr-miR164d>nta-miR164c>ppe-miR164d>ptc-miR164f>rco-miR164d>stu-miR164-5p>tcc-miR164c>vvi-miR164b	0.673463	0.364258	1.8323	0.824998	0.451304	1.23444	0.777513	0.81569	1.2265	3.91723	1.14575	3.66183	1.93041	0.335437	0.600087	1.41315	1.15812	0.922034	TGGAGAAGCAGGGCACATGCT	21
fve-miR167d	0.909175	0.0728516	0	0	0.381873	12.0108	0.71272	0.0741536	0	16.7552	10.3118	0	0.101601	0	8.59072	11.2362	0.613123	0.0987894	TGAAGCTGCCAGCATGATCTCA	22
fve-miR171b>mes-miR171l	0	0	0	0	0	0.0667267	0.0323964	0	0	0	0	0	0	0	0.0315835	0.034467	0	0	CGAGCCGAACCAATATCACTC	21
fve-miR171f-5p>gma-miR171k-5p>gma-miR171l>lja-miR171d-3p>mtr-miR171e-5p	1.21223	1.23848	1.32333	1.14782	0.347157	0.50045	1.7818	0.667382	0.919878	0.954618	0.416638	0.665788	0.812804	0.457414	0.44217	1.89568	2.11187	2.17337	CGATGTTGGTGAGGTTCAATC	21
fve-miR2111c>fve-miR2111a>fve-miR2111b-5p	0	0.0364258	0	0	0	0.0667267	0	0	0	0	0	0	0	0.0609886	0	0.0689339	0	0.0329298	TAATCTGCATCCTGAGGTTT	20
fve-miR396b-3p	0	0	0	0	0	0	0	0	0	0	0	0	0	0	0.0315835	0	0	0	GCTCAAGAAAGCTGTGGGACA	21
fve-miR396e	0	0	0	0	0	0	0	0	0	0.0658357	0	0	0	0	0	0	0	0	TTCCACAGGCTTTCTTGAACT	21
fve-miR399b	0	0	0	0	0.0347157	0.0333634	0	0	0	0.0658357	0	0	0	0	0	0.0689339	0	0	AGCCAAAGGAGAATTGCCCTG	21
fve-miR477a	0	0	0	0	0.0347157	0	0	0	0	0	0	0	0	0	0	0	0	0	ACTCTCCCTCAAGGGCTTCTC	21
fve-miR477b	0	0	0.0339315	0	0	0	0	0	0	0	0.0694396	0.0369882	0	0	0	0	0	0	CGCGCACCCGTTCATCTTCGC	21
fve-miR482c	0.0673463	0	0	0	0.0347157	0	0.0971891	0.0370768	0	0	0.0694396	0.0369882	0	0	0	0	0.0340624	0	TCTTTCCTATTCCTCCCATCCC	22
fve-miR482d	0.0336732	0	0	0	0	0	0	0	0.0511043	0	0	0	0	0	0	0	0.0340624	0.0329298	TTCCCTATTCCACCTATTCCCC	22
fve-miR530	0.0336732	0	0	0	0.104147	0	0	0	0	0	0	0	0	0	0	0	0	0	TGCATTTGCACCTGCACCTCT	21
ghr-miR156c	0.303058	0.0728516	0.373247	0.107608	0.208294	0.166817	0.0971891	0.222461	0	0.230425	0.0694396	0.0739764	0.0338668	0.304943	0.315835	0.103401	0.0681248	0.0658596	TGTCAGAAGAGAGTGAGCAC	20
ghr-miR479	0.168366	0	0.0678631	0	0	0.0333634	0	0.0741536	0.0511043	0	0	0	0.101601	0	0	0	0	0.0329298	CGTGATATTGGTTCGGCTCATC	22
ghr-miR482a>sly-miR482e-3p	0	0	0	0	0	0.0333634	0	0	0	0.0329179	0	0.0369882	0	0	0	0	0	0	TCTTTCCTACTCCTCCCATACC	22
ghr-miR7496a>ghr-miR7496b	0	0	0	0	0	0	0	0	0	0	0	0	0	0	0.0315835	0	0	0	ATGACCAAATTGATAGAATGTGTA	24
ghr-miR7505	0	0	0	0	0	0.0333634	0	0	0	0	0	0	0	0	0	0	0	0	TTCAGAAACCATCCCTTCCTT	21
ghr-miR7506	0	0	0	0	0.0694315	0	0	0	0	0	0	0.0369882	0	0	0	0	0	0	ATGTCTGGGACATGGCGTTGGCAC	24
ghr-miR7514	0	0	0	0	0	0	0	0	0	0	0	0	0	0	0	0.034467	0	0	ATAAAGTGATAAGTGAGATCGTCT	24
gma-miR10407a>gma-miR10407b	0	0	0	0	0	0	0	0	0	0	0	0	0.0338668	0	0	0	0	0	AGTTAACGGATGAATGAATTTGTC	24
gma-miR10446	0	0.0364258	0	0.0358695	0	0	0	0	0	0	0	0.0369882	0	0.0304943	0.0631671	0	0	0	TCAACTCAAGTCGAGCTCAAGCCT	24
gma-miR1510b-5p	0	0	0.0339315	0	0	0	0	0	0	0	0	0	0	0	0	0	0	0	AGGGATAGGTAAAACAACTACT	22
gma-miR1511	0.0673463	0.0364258	0	0.143478	0	0	0	0	0	0	0.0347198	0	0	0.0304943	0.126334	0.034467	0	0	AACCAGGCTCTGATACCATG	20
gma-miR1520f-5p	0	0	0.0339315	0	0	0	0	0	0	0	0	0	0	0	0	0	0	0	ATTGTCACGTGTCATGTTCTGATT	24
gma-miR1521b	0.0673463	0.0364258	0	0.0358695	0.0694315	0.0333634	0	0	0	0	0.0347198	0	0	0.0914829	0	0.034467	0	0	GACTGTCACGTGTCATAATCATA	23
gma-miR156e>mdm-miR156p>mdm-miR156q>mdm-miR156r>mdm-miR156s>pab-miR156o>smo-miR156b	0	0	0.135726	0	0	0	0.0647927	0.0370768	0.0511043	0	0.104159	0	0.0338668	0.0304943	0	0	0.0340624	0.0658596	CTGACAGAAGATAGAGAGCAC	21
gma-miR156f	0.572444	0.182129	0.678631	0.64565	0.381873	0.233544	0.161982	0.630306	0.562148	0.888782	0.624957	0.184941	0.406402	0.152471	0.44217	0.723806	0.340624	0.0987894	TTGACAGAAGAGAGAGAGCACA	22
gma-miR156g	0	0	0	0	0	0	0	0	0	0	0	0	0	0	0	0	0.0340624	0	ACAGAAGATAGAGAGCACAG	20
gma-miR156q>gma-miR156s	72.532	49.1384	1.49299	1.65	1.35391	112.868	57.6007	1.55723	1.53313	79.2991	1.00687	0.998682	66.5145	2.22608	137.357	82.376	1.66906	101.819	TGACAGAAGAGAGTGAGCACT	21
gma-miR156r	0	0.0364258	0.169658	0.215217	0.0347157	0.0333634	0	0.0370768	0.0511043	0	0	0	0	0.0304943	0.0315835	0.034467	0	0.131719	CTGACAGAAGATAGAGAGCAT	21
gma-miR156z>gma-miR156aa	0	0	0	0	0.0694315	0	0	0	0	0	0	0	0	0	0	0	0	0	ATTGGAGTGAAGGGAGCT	18
gma-miR159a-5p	0.168366	0.0364258	0.203589	1.21956	0.138863	1.66817	0.842306	0	1.27761	0	0.138879	0.184941	0.0338668	0.0914829	0.0315835	0.0689339	0.987809	0	GAGCTCCTTGAAGTCCAATTG	21
gma-miR159b-3p>gma-miR159f-3p>mtr-miR159b	0	0	0	0	0	0.0667267	0.0323964	0	0	0	0	0	0	0	0	0	0	0	ATTGGAGTGAAGGGAGCTCCA	21
gma-miR159c	0.0336732	0	0	0	0	0	0	0	0	0	0	0.0739764	0	0	0.0315835	0	0	0	ATTGGAGTGAAGGGAGCTCCG	21
gma-miR159d	0	0	0.0339315	0.0717389	0	0.0333634	0	0	0	0	0	0	0.0338668	0	0	0	0	0	AGCTGCTTAGCTATGGATCCC	21
gma-miR159e-5p	1.51529	1.34775	0.0339315	0.0717389	0.208294	0.0667267	0.0323964	0.148307	0.0511043	0.164589	0.138879	1.44254	0.948271	0.0304943	1.26334	0.034467	0.0340624	0.164649	GAGCTCCTTGAAGTCCAATT	20
gma-miR164b>gma-miR164c>gma-miR164d	0.101019	314.901	0	0	0.0694315	0.266907	0.0647927	0.889843	10.0676	0.0329179	9.79099	0	0.0338668	14.0884	14.0547	1.89568	0.0340624	2.89782	TGGAGAAGCAGGGCACGTGC	20
gma-miR166i-5p	0	0	0	0	0	0	0	0	0	0	0.0347198	0	0	0	0	0	0	0	GGAATGTCGTCTGGTTCGAG	20
gma-miR166m	0.808156	0.837794	0	0	0	0	0.259171	1.18646	0	0	0	0	0	0	0.53692	0	0	0.362228	CGGACCAGGCTTCATTCCCC	20
gma-miR166u	32.1915	0.655665	39.5981	54.2705	10.38	34.8981	45.9704	24.9898	45.2273	19.3557	35.4489	29.6276	10.4987	13.387	37.3002	56.6637	43.0889	4.41259	TCTCGGACCAGGCTTCATTC	20
gma-miR167h	0.0336732	0	0	0	0	0.0667267	0	0	0	0	0	0	0.0677337	0	0	0.034467	0	0	ATCATGCTGGCAGCTTCAACTGGT	24
gma-miR167k	0	0	0.0339315	0.0358695	0	0.0333634	0	0.0370768	0	0.0329179	0	0	0	0	0	0	0	0	TGAAGCTGCCAGCCTGATCTTA	22
gma-miR168b	0.101019	0.0364258	0.101795	0.0358695	0	0.133453	0.0647927	0.0370768	0.511043	0.0987536	0.555517	0.591811	0.711204	0	0.0947506	0	0	0.559806	TCGCTTGGTGCAGGTCGGG	19
gma-miR171a	0	0	0	0	0	0	0.0323964	0	0	0.0329179	0.0347198	0.0369882	0	0	0	0	0	0	TGAGCCGTGCCAATATCACGA	21
gma-miR171b-5p	0	0	0	0	0	0.0333634	0	0	0	0	0	0	0	0	0	0	0	0	ACGGCGTGATATTGGTACGGCTC	23
gma-miR172b-5p	0.0336732	0.145703	0.305384	0.0717389	0.347157	0	0	0.0741536	0	0.164589	0	0	0.0338668	0	0.0631671	0.103401	0.0340624	0.0658596	GTAGCATCATCAAGATTCAC	20
gma-miR172d>gma-miR172e	0	0	0.0339315	0.0717389	0.24301	0	0	0.0370768	0	0.0987536	0	0	0	0.548897	0	0.034467	0	0.0987894	GGAATCTTGATGATGCTGCAGCAG	24
gma-miR172k	0.0336732	0	0.0339315	1.11195	1.52749	0.0333634	0.0323964	0.0741536	1.68644	0.0658357	0.0694396	0.0369882	0	0	0.0315835	0.654872	0	0.0329298	TGAATCTTGATGATGCTGCAT	21
gma-miR2119>pvu-miR2119	0	0	0	0	0	0	0	0.0370768	0	0	0	0	0	0	0	0	0	0	TCAAAGGGAGTTGTAGGGGAA	21
gma-miR319g>gma-miR319l	6.0275	34.0581	0.508973	0.358695	0.72903	1.03426	15.3883	18.5013	0.102209	0.559604	1.21519	3.99473	36.6439	0.396426	55.4923	0.34467	5.27967	6.55303	TTGGACTGAAGGGAGCTCCTTC	22
gma-miR319i	0	0	0	0	0.0347157	0	0	0	0	0	0	0	0	0	0	0	0	0	TTGGACTGAAGGGGAGCTCCTTC	23
gma-miR319n	0	0.0364258	0	0	0.138863	0	0	0.0370768	0	0	0	0	0.0338668	0.0304943	0.0315835	0	0	0	TTTGGACCGAAGGGAGCCCCT	21
gma-miR319p	0.74081	0.0364258	0	0.358695	0.312442	0.366997	0.550738	4.30091	12.6228	0	0.173599	1.07266	0	0.243954	0.221085	1.17188	0.0681248	0.197579	TTTTGGACTGAAGGGAGCTCC	21
gma-miR319q	0	0.109277	0	0.358695	0.555452	0.0333634	0.71272	1.14938	0	0.0658357	0	0.0369882	0	0.243954	0.53692	0.034467	0	0.230509	TGGACTGAAGGGAGCTCCTTC	21
gma-miR390a-3p>gma-miR390c>mes-miR390	0	0.764942	0.984015	0	0.208294	0.166817	0.809909	1.14938	0.204417	0.691275	0	0.0369882	0	0	0.0947506	0	0.817497	0.922034	CGCTATCCATCCTGAGTTTC	20
gma-miR390b-5p>gma-miR390d>nta-miR390a>sly-miR390a-5p>stu-miR390-5p	1.58264	0.983497	1.32333	1.04021	0.902609	1.20108	2.23535	3.29984	2.45301	1.02045	1.07631	0.998682	0.406402	0.396426	0.568504	1.48208	0.885622	1.15254	AAGCTCAGGAGGGATAGCACC	21
gma-miR391a-3p	0	0.0364258	0	0	0	0	0	0	0	0	0	0	0	0	0	0	0	0	AGCATCATATCTCCTGCATAG	21
gma-miR395d>gma-miR395e>gma-miR395f>gma-miR395g	0.909175	0.364258	0.0339315	0	0.0694315	0	1.06908	0.92692	0.919878	0.0329179	0.451358	0.369882	0.0338668	0.518403	0	0.0689339	0.170312	0	TGAAGTGTTTGGGGGAACTTT	21
gma-miR395h	0	0	0.0339315	0	0	0	0	0	0.0511043	0	0	0	0	0	0	0	0	0	ATGAAGTGTTTGGGAGAACTC	21
gma-miR396a-3p	0.269385	4.99034	8.95793	6.20542	4.96435	5.77186	9.52453	5.22783	8.73884	7.27485	4.89549	4.6975	5.99443	0.21346	0.915923	8.85801	5.92685	6.8494	TTCAATAAAGCTGTGGGAAG	20
gma-miR396e	0.336732	0.509961	0.848289	83.0737	70.5076	1.23444	0.550738	0.630306	171.199	1.2838	55.8989	0.443858	0.711204	78.2788	0.53692	71.8291	0.272499	51.3705	TTCCACAGCTTTCTTGAACTGT	22
gma-miR396h	0.336732	0.582813	0.203589	0.251086	0.590167	1.06763	0	0.148307	0.102209	0.230425	0.0694396	0.369882	0.372535	0.0304943	1.16859	0.034467	0	0.0658596	TCCACAGCTTTCTTGAACTG	20
gma-miR396j	0	0	0	0	0	0	0	0	0	0	0	0	0	0.0304943	0	0	0	0	ATTCAAGATAGCTGTGGAAAA	21
gma-miR399d>gma-miR399e>gma-miR399f>gma-miR399g>lus-miR399f>lus-miR399g>mtr-miR399a>mtr-miR399e>mtr-miR399f>mtr-miR399g>mtr-miR399s-3p>mtr-miR399t-3p>osa-miR399e>osa-miR399f>osa-miR399g>rco-miR399e>sbi-miR399e>sbi-miR399f	0	0	0	0	0	0.0333634	0	0	0	0	0	0	0	0	0	0	0	0	TGCCAAAGGAGATTTGCCCAG	21
gma-miR403a>gma-miR403b	4.1418	1.34775	4.75042	5.41629	2.18709	3.87015	8.22868	8.04567	9.76092	7.80153	5.34685	4.73449	4.53816	4.51315	3.53736	9.09928	5.72248	7.27748	TTAGATTCACGCACAAACTTG	21
gma-miR408d	0.808156	2.65908	0.610768	0.143478	0.694315	0.333634	17.4292	8.1569	1.02209	0.625439	0.208319	0	0.101601	0.487909	0	1.58548	0.57906	0	TGCACTGCCTCTTCCCTGGC	20
gma-miR4374a	0	0	0.0339315	0	0	0	0	0	0	0	0	0	0.0338668	0	0	0	0	0	TAAGACGGTCGTGATGTCAGCA	22
gma-miR4379	0	0	0	0	0	0	0	0	0.0511043	0	0	0	0	0	0	0	0	0	TAGAGTGTATACTGTGAGAGGCCT	24
gma-miR4383	0.0336732	0	0	0	0	0	0	0	0	0	0	0	0	0	0	0	0	0	TATTGGATCTCAGTTGAACCGGTC	24
gma-miR4388	0	0	0	0	0	0.0667267	0	0	0	0	0	0	0	0	0	0	0	0	AATCTTAGGGACCAAATTGACAGC	24
gma-miR4389	0	0	0.0339315	0	0	0	0	0	0	0	0.0347198	0	0	0	0	0	0	0	TCGGTCGGACCGATCCAATCGGAA	24
gma-miR4395	0	0	0	0	0	0	0	0	0	0.0329179	0	0	0	0.0304943	0.0315835	0.034467	0	0	TGGATAGGAGTATGGGCTTGAG	22
gma-miR4405b	0	0	0	0	0	0	0	0	0	0	0	0	0	0.0304943	0	0	0	0	TTCCGAATAACCGACTTAGAAATC	24
gma-miR4407	0	0	0	0	0	0.0667267	0	0	0	0	0	0	0	0	0	0	0	0	CAGAGGAAGCAGCACTTGTACC	22
gma-miR4414a-5p	0.269385	0.182129	0.44111	0.215217	0.24301	0.233544	0.129585	0.148307	0.102209	0.329179	0.486077	0.40687	0.0338668	0.152471	0.252668	0	0.0340624	0	AGCTGCTGACTCGTTGGCTC	20
gma-miR4414b	10.1019	12.3119	16.0496	13.5587	9.09552	11.1434	6.73844	3.55937	4.13945	30.449	19.4084	18.2352	8.66991	9.84966	9.12765	0.413603	1.26031	0.889104	AGCTGCTGACTCGTTGGTTCG	21
gma-miR482b-3p>gma-miR482d-3p	0	0	0	0	0	0.0333634	0	0	0	0	0	0	0	0	0	0	0	0	TCTTCCCTACACCTCCCATACC	22
gma-miR482c-5p	0	0	0	0	0	0	0	0	0	0	0	0	0	0	0	0	0	0.0658596	ATTTGTGGGAATGGGCTGATTGG	23
gma-miR4993	0.0336732	0	0	0	0	0	0	0	0	0	0	0	0	0	0	0	0	0	GAGCGGCGGCGGTGGAGGATG	21
gma-miR4994-5p	0	0	0	0	0	0	0	0	0	0	0.0347198	0	0	0	0	0	0	0	GGTTAGCTCAAGGATCTCAC	20
gma-miR4995	0.168366	0.109277	0.135726	0.215217	0	0.0333634	0.0647927	0.0741536	0.102209	0.0329179	0.0694396	0.0739764	0.0677337	0.0304943	0.0947506	0.103401	0.0340624	0.0658596	AGGCAGTGGCTTGGTTAAGGG	21
gma-miR5037d	0	0	0	0	0	0	0	0.0370768	0	0	0	0	0	0	0	0	0	0	CGGGAGCCTATGAAGGTTAAC	21
gma-miR530a	0	0	0	0	0	0	0	0	0	0	0	0	0	0	0.0315835	0	0	0	TGCATTTGCACCTGCACTTT	20
gma-miR5368	0.0336732	0.0364258	0	0.0358695	0.208294	0.20018	0	0.11123	0	0.0658357	0.104159	0.0739764	0.101601	0.0609886	0.126334	0	0	0.230509	GGACAGTCTCAGGTAGACA	19
gma-miR5675	0	0	0	0	0	0	0	0	0	0	0	0	0	0.0304943	0	0	0	0	TAGAGACGACAACAATGGAAA	21
gma-miR5769	0	0	0	0	0	0	0	0	0	0	0	0	0	0	0	0	0.0340624	0	TGAGGGAAATGAAGACGACGA	21
gma-miR5786	0	0	0	0.0358695	0	0	0	0.0370768	0	0	0	0	0	0	0	0	0	0	TGTCGCAGGATAGAGGGCACT	21
gma-miR6300	5.96015	3.05977	9.43297	9.72063	8.40121	10.9098	9.03859	14.1263	12.2139	5.8923	6.90924	6.62089	5.21549	8.47741	8.87498	8.99587	8.65184	8.03487	GTCGTTGTAGTATAGTGG	18
gma-miR9766	0.0336732	0	0	0	0	0	0	0	0	0	0	0	0	0	0	0	0	0	TTTGAAGGGAAGGAATGAAAC	21
gra-miR166c	0	0	0.0339315	0	0	0	0	0	0.102209	0	0.0347198	0	0	0	0	0	0	0	TATATGATCTCGGACCAGGCT	21
gra-miR166d	0	0	0	0	0	0	0	0	0	0	0	0	0	0.0304943	0	0	0	0	TGATGGGAATGTTGTTTGGCT	21
gra-miR167c	0	0	0.407179	0	0	0	0	0.185384	0.204417	0	0	0	0	0	0	0	0	0.131719	TCAGATGAAGCTGCCAGCATGA	22
gra-miR3476	0	0	0	0	0	0	0	0	0	0	0	0	0	0	0	0.034467	0	0	TCGGACTGGATTTGTTGACAA	21
gra-miR7486f>gra-miR7486g	0.0336732	0	0	0	0	0	0	0	0	0	0	0	0	0	0	0	0	0	CGCTTTGCTGACGTGGAAACAAAT	24
gra-miR7486i	0	0	0	0.0358695	0	0	0	0	0	0	0	0	0	0	0	0	0	0	GCTGACGTGGAAGGAAATCGCTA	23
gra-miR7504g	0	0	0	0	0	0	0.0323964	0	0	0	0	0	0	0	0	0	0	0	AGGAGGAAATCTGATTTGTCATTC	24
gra-miR7584e	0	0	0	0	0	0	0	0	0	0	0	0	0	0	0	0	0	0.0329298	AGGAGTTAGATTGTATTTTAT	21
gra-miR8659a>gra-miR8659b	0	0	0	0	0	0	0	0	0	0	0	0	0	0	0.0315835	0	0	0	AATTTTTTAAGGTTGTTTGTGGAA	24
gra-miR8663b	0	0.0364258	0	0	0	0	0	0	0	0	0	0	0	0	0	0	0	0	TGAGGCATGAACTTGGCAATTTT	23
gra-miR8664	0	0	0	0	0	0	0.0323964	0	0	0	0	0	0	0	0	0	0	0	TGGAGTCAACGGTGGGACGGAGA	23
gra-miR8685	0	0	0	0	0	0	0	0	0	0	0	0	0	0	0.0631671	0	0	0	AGACGACACTTCAAAGATTTCTCC	24
gra-miR8691	0	0	0	0	0	0	0	0.0370768	0	0	0	0	0	0	0.0315835	0	0	0	AGATGATGAGAAAGGAAAGTCAAG	24
gra-miR8757a	0	0	0	0	0	0	0	0	0	0	0	0.0369882	0	0.0304943	0	0.034467	0	0	TGGGCCGAGCTTGGACAAGCATA	23
gra-miR8778	0	0	0	0.0358695	0	0	0	0	0	0	0	0	0	0	0	0	0	0	TTTCCATATTAGGGTTTGAACTTT	24
han-miR3630-3p	0.875502	0.837794	0.678631	0.968476	0.48602	0.900811	0.971891	1.40892	1.94196	0.724193	0.312478	0.739764	0.64347	1.0673	0.947506	0.620405	0.919684	0.493947	TGTGGGAATCTCTCTGATGCTT	22
har-miR156c	0.168366	0	0.203589	0.0358695	0	0.0667267	0	0	0.0511043	0.0658357	0	0	0	0	0	0.034467	0	0	TGACAGAAGAGAGGGAGCA	19
hbr-miR156	0	0	1.69658	2.69021	0.173579	0.0333634	0.129585	0.222461	1.2265	0.164589	0.972155	0	0.880538	0	0.284252	0.034467	0	0	TTGACAGAAGATAGAGAGC	19
hbr-miR166a>mes-miR166j>pde-miR166a>pde-miR166b>vvi-miR166a>vvi-miR166b	0	0	0	0	0	0	0	0	0.766565	0	32.22	7.39764	0	20.4922	0	1.34421	0	0	TCGGACCAGGCTTCATTCC	19
hbr-miR396a	0	0	0	0	0.104147	0.0333634	0.0647927	0	0	0.0329179	0	0	0.135467	0	0	0.034467	0	0.131719	CACAGCTTTCTTGAACTTTCT	21
hbr-miR6173	0.538771	0.327832	0.407179	0.538042	0.763746	0.800721	0.323964	0.519075	0.35773	0.559604	0.451358	0.554823	0.237068	0.609886	0.758005	0.413603	0.476873	0.329298	AGCCGTAAACGATGGATACT	20
hci-miR156a	11.6172	9.14288	12.1136	11.9087	10.6924	9.54192	12.343	8.11982	8.2789	14.6485	9.16603	7.10174	10.0923	18.2966	15.697	6.16958	5.44998	6.09201	TGACAGAAGAGAGTGAGTAC	20
hci-miR164a	1.27958	21.2727	21.309	50.1455	58.3224	29.0929	0.161982	21.4675	0.102209	0.724193	26.7343	28.074	1.42241	17.9001	0.189501	0.0689339	1.09	0.0658596	TGGAGAAGCAGGGCACGTGAA	21
htu-miR171a	0.0673463	0	0.610768	0	0.0694315	0.0333634	0.161982	0.0370768	0.102209	0	0.138879	0	0	0.0609886	0.157918	0.241269	0	0	TGATTGAGCCGTGCCAATAT	20
hvu-miR168-3p>osa-miR168a-3p	0	0	0	0	0	0	0	0	0	0.0658357	0	0	0	0	0	0	0	0	GATCCCGCCTTGCACCAAGTGAAT	24
hvu-miR397a	0.168366	0	0	0	0	0	0.226775	0	0.102209	0	0	0.0369882	0	0	0	0	0	0	CCGTTGAGTGCAGCGTTGATG	21
hvu-miR5048a>hvu-miR5048b	0	0	0	0	0	0	0	0	0	0	0	0	0	0	0	0	0.0340624	0	TATTTGCAGGTTTTAGGTCTAA	22
hvu-miR5049c	0	0	0	0	0	0	0	0	0	0	0	0	0	0.0304943	0	0	0	0	AGACAATTATTTTGGGACGGAGG	23
hvu-miR5050	0	0	0	0	0	0	0	0	0	0	0	0.0369882	0	0	0	0	0	0	TTGAGGTCGTTCAACCAGCAA	21
hvu-miR5053	0	0	0	0	0	0	0	0	0	0	0	0	0	0	0	0	0.0340624	0	CGCAGCTGTAGTCGCCGGCGT	21
hvu-miR6181	0	0	0	0	0	0.0333634	0	0	0	0	0	0	0	0	0	0	0	0	TGCTCTTCATGGACTGCGGCGCC	23
hvu-miR6182	0	0	0.0339315	0	0	0	0	0	0	0	0	0	0	0	0	0	0	0	TGAGTGTGTGATGGATGGCTTT	22
hvu-miR6185	0	0	0	0	0	0.0333634	0	0	0	0	0	0	0	0	0	0	0	0	TCTGGCAGCGACGGGAACATA	21
hvu-miR6196	0	0	0	0	0	0	0	0	0	0	0	0	0	0	0.0315835	0	0	0	AGGACGAGGAGATGGAGAGGA	21
hvu-miR6206	0	0	0	0	0	0	0	0	0	0	0	0.0369882	0	0	0	0	0	0	GGCACACGGGCTGCAGGCATAG	22
hvu-miR6214	0	0	0	0.0358695	0	0	0.0323964	0.0741536	0	0	0.0347198	0	0.0338668	0	0.0631671	0	0	0	CGACGACGACGAGCACGACA	20
lja-miR11095-3p	0	0	0	0	0	0.0333634	0	0	0	0	0	0	0	0	0	0	0	0	ATTCAGAATCAATTGTAGTAG	21
lja-miR11103e-3p	0	0	0	0	0	0	0	0.0741536	0	0	0	0	0	0	0	0	0	0	AGAAATCTACTGGAGAGGATCTGG	24
lja-miR11108o-3p>lja-miR11108p-3p	0	0.0364258	0	0	0	0	0	0	0	0	0	0	0	0	0	0	0	0	GATTGGATGATGAGTTATTTAACC	24
lja-miR11108s-5p	0	0	0	0.0358695	0	0	0	0	0	0	0	0	0	0	0	0	0	0	CATTGAAGATAAGTGAGTTGGA	22
lja-miR11111-3p>lja-miR11112-3p	0	0	0	0	0	0	0.0647927	0	0	0	0	0	0	0	0	0	0	0	TGAGATGATGAAACTTGACAC	21
lja-miR11124-3p	0	0	0	0	0.0347157	0	0	0	0	0	0	0	0	0	0	0	0	0	TCCCATGATGACAGATGAGATA	22
lja-miR11127-5p	0	0	0	0	0.0347157	0	0	0	0	0	0	0	0	0	0	0	0	0	CGGTTCGGACCCGCTGTAGAGC	22
lja-miR11144-3p	0.0336732	0	0	0	0	0	0	0	0	0	0	0	0	0	0	0	0	0	GAACAGGGATAAAATGGACAATT	23
lja-miR11155b-5p	0	0	0	0	0	0	0	0.0741536	0	0	0	0	0	0	0	0	0	0	AAGCGAGTTTGATTTTAGTCCCTC	24
lja-miR11155d-5p	0	0	0	0	0	0	0	0	0	0	0	0	0	0	0.0315835	0	0	0	AGTTTGATTTTAGTTCCTCTAAGG	24
lja-miR11156-5p	0.0336732	0	0	0	0	0	0	0	0	0	0	0	0	0	0	0	0	0.0329298	AAGATGGGATGATTGAATTTTGAC	24
lja-miR11160-5p	0	0	0	0	0	0	0	0	0	0	0	0	0	0	0	0	0.0340624	0.0329298	AGACTGATTTGATAGGAGAACTCC	24
lja-miR11173-3p	0	0	0	0	0	0.0333634	0	0	0	0	0	0	0	0	0	0	0	0	TCTATTGGTGGGATAAAGAAGAGA	24
lja-miR1511-3p	0	0	0	0.0358695	0	0	0	0	0	0.0658357	0	0	0	0.0304943	0	0.034467	0	0.0329298	AACCAGGCTCTGATACCATGAAGC	24
lja-miR164-5p	0	0	0.0678631	0	0.138863	0.0333634	0	0.0370768	0	0.0329179	0	0.0369882	0	0.0304943	0.0315835	0	0	0	ACGCTGGAGAAGCAGGGCAC	20
lja-miR166-3p	0.404078	852.364	45.095	0.286956	0.24301	33.9973	717.612	32.3681	0.613252	0.263343	0.381918	0.443858	0.304802	0.975817	25.709	0.34467	0.613123	716.124	ATTTCGGACCAGGCTTCATTCCCC	24
lja-miR168-3p	17.4764	12.3483	136.439	5.66738	141.085	181.163	13.7685	560.231	409.754	46.2496	39.9278	15.9789	96.1141	127.527	6.00087	13.1319	15.3962	418.241	TCCCGCCTTGCATCAACTGAAT	22
lja-miR168-5p	68.2218	63.3809	33.4904	40.9629	48.0118	20.9856	137.976	175.336	133.638	133.515	43.9553	150.69	10.7358	12.7771	28.362	46.7372	33.3811	41.1293	TCGCTTGGTGCAGGTCGGGAAC	22
lja-miR171c	0.202039	0.0364258	0.203589	0	0.0694315	0.0667267	0.0971891	0.148307	0.102209	0.0987536	0.104159	0.184941	0.169334	0	0.0315835	0.137868	0.0681248	0.0658596	TGAGCCGAATCAATATCACTC	21
lja-miR397	0.101019	0	0.0678631	0	0	0.0667267	0.0647927	0.593229	0	0.0329179	0	0	0.0338668	0	0	0.034467	0	0.296368	TATTGAGTGCAGCGTTGATGA	21
lja-miR398-3p>stu-miR398b-3p	0.0336732	0	0.0678631	0	0.0347157	0	0	0	0.102209	0	0	0	0	0.152471	0	0	0.0340624	0	TTGTGTTCTCAGGTCACCCCT	21
lja-miR7531	0	0.0364258	0	0.107608	0	0	0	0	0	0	0	0	0	0	0.0315835	0	0	0	CGTGTTTTCTTTCATTCCCCA	21
lja-miR7535	0	0	0	0	0	0	0	0	0	0.0329179	0	0	0	0	0	0	0	0	GGGAAAATGTGGGTGTGGT	19
lus-miR159a>ptc-miR159c	0	0.0364258	0	0	0	0	0	0	0	0	0.0347198	0	0	0.0304943	0	0	0	0	ATTGGAGTGAAGGGAGCTCGA	21
lus-miR159b	4.10813	2.73194	742.626	185.732	2.32595	1.90171	11.7275	399.243	1.73755	24.2934	3.09006	15.0172	2.70935	17.2293	2.8741	3.13649	0.953747	1.48184	TTTGGATTGAAGGGAGCTCTC	21
lus-miR167a>vvi-miR167c	0.0336732	0.364258	0.746494	0.609781	0.0694315	0	12.1486	10.641	0.71546	0	0	0.443858	0.914405	8.66038	0.852756	9.20268	0	0.493947	TGAAGCTGCCAGCATGATCTC	21
lus-miR171a>lus-miR171f>mes-miR171f>mtr-miR171e-3p>ptc-miR171c>ptc-miR171d>rco-miR171g>tcc-miR171b>tcc-miR171c	0	0	0.0339315	0.0358695	0	0	0	0.0741536	0	0	0	0.0369882	0	0	0	0	0	0	AGATTGAGCCGCGCCAATATC	21
lus-miR171h>sbi-miR171f	0	0.0728516	0	0	0	0	0.0971891	0.0370768	0	0	0	0.0369882	0	0	0.0631671	0.034467	0	0	ATGAGCCGAACCAATATCACT	21
lus-miR172j	0	0	0	0	0	0	0.0323964	0	0	0	0	0	0	0	0	0	0	0	GCAGCATCATCAAGATTCCCA	21
lus-miR398d>lus-miR398e>ssl-miR398	0.370405	0.145703	0.44111	0.394564	0.381873	0.30027	0.518342	0.370768	0.153313	0.395014	0.381918	0.147953	0.237068	0.243954	0.157918	0.413603	0.340624	0.592736	TGTGTTCTCAGGTCACCCCTC	21
lus-miR398f	0.0336732	0	0	0.0358695	0	0	0	0.0370768	0	0	0	0	0	0	0	0	0	0	GGTGTTCTCAGGTCGCCCCTG	21
mdm-miR11008	0	0	0	0	0	0	0	0	0	0.0329179	0	0	0	0	0	0	0	0	GTGACCGCACAAAATAGAAGA	21
mdm-miR1511	0.134693	0.145703	20.8679	7.20976	52.0736	10.4094	0	34.741	41.5478	85.6194	16.4919	47.2709	26.8903	37.9959	4.26378	8.61674	5.10936	5.72978	ACCTAGCTCTGATACCATGAA	21
mdm-miR156ad>mdm-miR156ae	0.101019	0.254981	0	0.0717389	0.0347157	0.20018	0.0647927	0.0741536	0.102209	0	0.0694396	0.110965	0.101601	0.121977	0.0947506	0.034467	0.170312	0.0329298	TGACAGAAGAAAGTGAGCAC	20
mdm-miR164a	2.52549	2.62266	0.814357	2.40325	3.22856	2.3688	0.777513	1.85384	0.766565	0.592522	2.04847	0.702776	0.135467	1.86015	1.51601	1.06848	0.783435	0.691526	TGGAGAAGCAGGGCACATGCC	21
mdm-miR167h>mdm-miR167i>mdm-miR167j>ppe-miR167d	5.11832	2.22197	0.135726	9.54128	0.0694315	0.40036	1.39304	1.00107	1.2265	3.45638	2.32623	0.110965	8.19577	2.62251	0.473753	1.68888	9.7759	0.987894	TGAAGCTGCCAGCATGATCTTA	22
mdm-miR395l	0.370405	0.109277	0.407179	0.538042	0.312442	0.467087	0.453549	0.556152	0.306626	0.296261	0.416638	0.40687	0.237068	0.121977	0.252668	0.241269	0.238437	0.197579	CTGAAGTGTTTGGGGGAACCC	21
mdm-miR396a	33.8752	3.16905	6.68451	8.9315	9.2691	9.44183	5.83135	3.93014	7.61454	6.58357	31.6645	5.88112	6.50243	8.87384	8.90656	4.44624	2.38437	2.63438	TTCCACAGCTTTCTTGAACAG	21
mdm-miR397a>mdm-miR397b	0.0673463	0	0.0678631	0	0	0	0	0	0	0	0	0	0.169334	0	0	0.585938	0	0	TTGAGTGCAGCGTTGATGAAA	21
mdm-miR477b	0	0	0	0	0	0	0	0	0	0.0329179	0	0	0	0	0	0	0.0340624	0	ACTCTCCCTCAAGGGCTTCGAC	22
mdm-miR482b	0.303058	0.400684	0.271452	0.143478	0.347157	0.40036	0.226775	0.704459	0.306626	0.263343	0.208319	0.40687	0.101601	0.304943	0.157918	0.172335	0.204374	0.197579	TCTTTCCTATCCCTCCCATTCC	22
mdm-miR7121d>mdm-miR7121e>mdm-miR7121f>mdm-miR7121g>mdm-miR7121h	0	0	0	0	0	0	0	0	0	0.0329179	0	0	0	0	0	0	0	0	TCCTCTTGGTGATCGCCCTGC	21
mdm-miR858	2.18876	0.364258	3.35922	3.8739	6.38769	7.00631	0.680324	3.22568	2.14638	3.65388	0.972155	1.40555	6.7395	5.73293	2.52668	1.96462	0.749372	0.164649	TTCGTTGTCTGTTCGACCTGA	21
mes-miR159c>mes-miR159d	0	0	0	0	0	0.0333634	0	0	0	0	0.0347198	0	0	0	0	0	0.0340624	0	ATTGGAGTGAAGGGAGCTCTG	21
mes-miR160e>vvi-miR160a>vvi-miR160b	0	0	0.0678631	0.107608	0.138863	0.133453	0	0.0741536	0	0	0	0.110965	0	0	0	0	0	0	TGCCTGGCTCCCTGAATGCCATC	23
mes-miR160g	3.46834	0.983497	0.475042	0.789128	2.81197	2.7358	0.907098	4.11553	2.45301	2.13966	0.867995	3.18099	1.18534	0.792852	0.789589	1.24081	2.24812	0.856175	TGCCTGGCTCCCTGTATGCCATC	23
mes-miR160h	0.404078	1.71201	1.32333	0.143478	0.0347157	1.56808	1.26346	0.556152	0.153313	0.230425	0.173599	2.55219	0.169334	0.884334	1.04226	0.0689339	2.21405	1.15254	TGCCTGGCTCCCTGTATGCCATT	23
mes-miR166i	1.34693	1.09277	1.32333	0.64565	0.902609	1.46799	0.874702	1.33476	1.2265	1.11921	1.52767	1.73845	0.474136	1.49422	0.97909	0.79274	1.05593	0.790315	TTGGACCAGGCTTCATTCCCC	21
mes-miR171d	0.168366	0	0	0	0	0	0	0	0	0	0	0	0	0	0	0	0.0681248	0	ATGAGCCGTGCCAATATCACG	21
mes-miR319h>vun-miR319b	85.0247	32.164	46.4184	11.263	97.6553	11.8106	3.27203	3.11445	3.88393	53.2611	12.0131	86.2195	6.50243	7.04418	4.45328	1.99908	1.39656	2.53559	CTTGGACTGAAGGGAGCTCCT	21
mes-miR394c>vvi-miR394a>vvi-miR394c	0.202039	24.0046	16.864	28.8032	0.0694315	29.4265	9.33015	21.727	0	0.362097	0.763836	0.739764	23.5374	0.121977	0.252668	0.241269	7.25529	0.362228	TTGGCATTCTGTCCACCTCCAT	22
mes-miR397	0	0.109277	0.135726	0	0	0	0.0323964	0	0	0	0	0	0	0	0	0.034467	0	0.230509	TTTGAGTGCAGCGTTGATGA	20
mes-miR477a>mes-miR477b>mes-miR477c>mes-miR477e	0	0	0	0	0	0.266907	0	0	0.0511043	0	0.0347198	0	0	0	0	0	0	0	CTCTCCCTCAAGGGCTTCTG	20
mes-miR477d	0	0	0	0	0	0	0	0	0	0	0	0	0	0	0	0.0689339	0.0681248	0	CTCTCCCTCAAGGGCTTCTC	20
mes-miR477h	0.0673463	0	0	0.0358695	0	0	0	0.0370768	0	0	0.0347198	0	0	0	0	0	0	0	ACTCTCCCTCAAGGGCTTCAG	21
mes-miR530b	0.0336732	0.109277	0.0339315	0.0717389	0.0347157	0.10009	0.0647927	0	0	0.0329179	0.138879	0.0369882	0.0677337	0	0.0631671	0	0	0	TGCATTTGCACCTGCACCTTA	21
mes-miR535b	0	0	0	0.0358695	0	0	0	0	0	0	0	0	0	0	0	0	0	0	TGACAACGAGAGAGAGCACGG	21
mtr-miR156g-3p	0	0	0	0	0.0347157	0	0	0	0	0	0	0	0	0	0	0	0	0	GCTCTCTAGACTTCTGTCATC	21
mtr-miR156j	0.437751	0.473536	0.678631	0.538042	0.381873	0.20018	1.03668	0.556152	0.766565	0.757111	0.381918	0.554823	0.474136	0.670874	0.915923	0.723806	0.613123	0.493947	TGACAGAAGAGGGTGAGCAC	20
mtr-miR166b	71.3534	3.78828	9.12759	4.84238	4.99906	22.7205	8.9414	7.82321	7.0524	13.9901	38.5737	5.88112	3.38668	20.9496	5.05337	21.2661	11.99	14.3245	TCGGACCAGGCTTCATTCCTA	21
mtr-miR166d	0.168366	0.0728516	0.135726	0	0.0347157	0.0667267	0.0323964	0.0370768	0.0511043	0.0329179	0.138879	0.221929	0.0338668	0.121977	0.0315835	0.034467	0.102187	0.0658596	TCGGGCCAGGCTTCATCCCCC	21
mtr-miR166e-5p>osa-miR166h-5p>zma-miR166m-5p	0	0.0728516	0	0.0358695	0.138863	0.10009	0.0647927	0.0370768	0.0511043	0.131671	0	0.221929	0.0677337	0.152471	0.0631671	0.172335	0.13625	0.197579	GGAATGTTGGCTGGCTCGAGG	21
mtr-miR171a	0.0673463	0	0	0	0	0.0667267	0	0	0	0	0	0	0.0677337	0	0	0	0	0	TGATTGAGTCGTGCCAATATC	21
mtr-miR171c	0.168366	0.0728516	0.305384	0.502173	0.138863	0.10009	0.0647927	0.333691	0.153313	0.526686	0.243039	0.0369882	0.135467	0.121977	0.0631671	0.034467	0.0681248	0.0987894	TGATTGAGCCGTGCCAATATT	21
mtr-miR172d-5p	0.134693	0.218555	0.373247	0.64565	0	0.266907	0.388756	0.259538	0.562148	0.625439	0.555517	0.295906	0.270935	0	0.221085	0.413603	0.204374	0.329298	AGTGGAGCATCATCAAGATTCACA	24
mtr-miR2111l	0	0	0	0	0	0	0	0	0	0	0.0347198	0	0	0	0	0	0	0	ATCCTTGGAATGCAGATTATC	21
mtr-miR2592bp-3p	0	0	0	0	0	0.0333634	0	0	0	0	0	0.0369882	0	0	0	0	0	0	CGGCAGAACTCCAGCATTCGA	21
mtr-miR2604	0	0	0	0	0	0	0	0	0	0	0	0	0.0338668	0	0	0	0	0	TAATTTTTATGTGGGAGTGTT	21
mtr-miR2629h	0	0	0	0	0	0	0.0323964	0	0	0	0	0	0	0	0	0	0	0	GCAGAAGATCCTCGGCAGTTAACT	24
mtr-miR2655b	0	0	0	0	0	0.0333634	0	0	0	0	0	0	0	0	0	0	0	0	CGTTTTGGTCCCTTAACTTTA	21
mtr-miR319a-5p	0.707136	0.327832	0.44111	0.358695	0.312442	0.40036	0.647927	0.222461	0.204417	0.329179	0.277759	0.295906	0.135467	0.152471	0.473753	0.0689339	0.238437	0.164649	AGAGCTTCCTTCAGTCCACTC	21
mtr-miR319c-3p>vvi-miR319g	10.7754	96.0549	2.61273	7.96302	180.001	4.27051	14.5784	1.66846	1.43092	2.69927	2.91646	3.80979	7.75551	1.79916	2.36877	1.20634	0.374686	17.5845	TTGGACTGAAGGGAGCTCCCA	21
mtr-miR395h	0.74081	0	1.05188	0.430434	1.18033	0.166817	0	0.222461	0	0.592522	0	0.0369882	0.575736	0.304943	0.189501	0.379136	0.170312	0.131719	ATGAAGTGTTTGGGGGAACTT	21
mtr-miR395k	0	0	0	0	0	0	0	0.0741536	0	0	0	0.0369882	0	0	0	0	0	0	TTGAAGCGTTTGGGGGAACTC	21
mtr-miR4414a-3p	0	0	0	0	0	0	0	0	0	0.0329179	0	0	0	0.0304943	0	0	0	0	ATCCAACGATGCGGGAGCTGC	21
mtr-miR5205a	0	0	0	0	0	0	0	0	0	0	0	0	0	0	0	0	0	0.0329298	CATACAATTTGGGACGGAGGGAG	23
mtr-miR5205b	0	0.0364258	0	0	0	0	0	0	0	0	0	0	0	0	0	0	0	0	CTTATAATTAGGGACGGAGGGAGT	24
mtr-miR5214-3p	0	0	0	0.0358695	0	0.0333634	0	0	0	0	0.0347198	0	0	0	0	0	0	0	TGATAGAGCTAGACCATCGGAG	22
mtr-miR5225a	0.875502	0.327832	0.746494	0.932606	0.347157	0.600541	0.291567	0.667382	0.153313	0.526686	0.138879	0.332894	0.304802	0.182966	0.252668	0.275736	0.102187	0.0658596	TCAGTCGCAGGAGAGATGACAC	22
mtr-miR5225b>mtr-miR5225c	0.0336732	0.0364258	0	0	0.0347157	0	0	0	0.0511043	0.0987536	0	0	0	0	0.0947506	0.0689339	0	0	TCGCAGGAGAGATGACACCTTC	22
mtr-miR5226	0.0336732	0	0	0	0	0	0	0	0	0	0	0	0	0	0.0315835	0	0	0	TTTGTACAACTTGGAGGATTCA	22
mtr-miR5260	0	0	0	0	0	0	0.0323964	0	0	0	0	0	0	0	0	0	0	0	TTTGTATTGTTGACATGGCTT	21
mtr-miR5265	0	0	0	0	0	0.0333634	0	0	0	0	0.0347198	0.0369882	0	0	0	0	0	0	AAGTGATGTTGGAATGGTTA	20
mtr-miR5266	0	0	0.0339315	0	0	0	0.0323964	0.0741536	0	0	0.0347198	0	0	0	0.0315835	0	0	0	CTGGGGGACTGTCTGGGGCG	20
mtr-miR5268a>mtr-miR5268b	0	0	0.0339315	0	0	0	0	0.0741536	0	0	0	0	0	0.0304943	0	0	0	0	CCAGAGTGGAATGAAGATATGGTT	24
mtr-miR5269b	0	0	0	0.0358695	0	0	0	0	0	0	0	0	0	0	0	0.034467	0	0	AAAGTGGTGGGACATACATTGATT	24
mtr-miR5284a>mtr-miR5284c>mtr-miR5284d>mtr-miR5284e>mtr-miR5284f>mtr-miR5284g	0	0.0364258	0	0	0	0	0	0	0	0.0329179	0.0694396	0	0	0.0304943	0	0	0	0	GAGGGACCAAAAGTGGAAGAATCT	24
mtr-miR5284b	0	0	0	0	0	0	0	0	0	0	0	0	0	0.0609886	0	0	0	0	GAGGGATCAAAAGTGGAAGAATCT	24
mtr-miR5284h	0.0336732	0	0.0339315	0	0	0	0	0	0	0	0	0	0	0	0.0315835	0	0.0340624	0	GAGGGATCAAAAGTGGAGGAATCT	24
mtr-miR5286a	0	0	0	0	0	0.0333634	0	0	0	0	0	0	0	0	0	0	0	0	CAGGACAAACTGGAGGCAAGGGAC	24
mtr-miR5291a>mtr-miR5291b>mtr-miR5291c	0	0	0	0	0	0	0	0	0	0	0	0	0	0	0.0315835	0	0	0	GTTTGATGGATGGATTGGATGGAT	24
mtr-miR530	0.0336732	0	0	0	0	0	0	0	0	0	0	0	0	0.0304943	0	0.034467	0	0	TGCATTTGCACCTGCACTTTC	21
mtr-miR5562-3p	0	0	0.0339315	0	0	0	0	0	0	0	0	0	0	0	0	0	0	0	ATGTGGAGAAGGCTGCAAC	19
mtr-miR5744	0	0	0	0	0	0	0	0	0.0511043	0	0	0	0	0	0	0	0	0	TAGGTATTTTAAGGAGCACGTT	22
mtr-miR5756	0	0	0	0	0	0.0333634	0	0	0	0	0	0	0	0	0	0	0	0	CCGACCGGATTCTCAGACGGG	21
nta-miR156f	0.134693	0.0728516	0.169658	0.179347	0.104147	0.0667267	0.226775	0.0370768	0.153313	0.0987536	0.104159	0.147953	0	0.0914829	0.189501	0.034467	0.0340624	0.0658596	TGACAGAAGAGAATGAGCAC	20
nta-miR160d>ptc-miR160h	0.0673463	0.0728516	0.0339315	0.0358695	0	0.10009	0	0	0	0.0329179	0.0347198	0.0369882	0	0.0304943	0.0315835	0	0	0	TGCCTGGCTCCCTGCATGCCA	21
nta-miR172b	0	0	0	0	0.0347157	0	0	0	0	0	0	0	0	0.0304943	0	0	0	0	AGAATCATGATGATGCTGCAT	21
nta-miR397	0	0	0.0678631	0	0	0	0.71272	0	0.0511043	0	0	0	0.0338668	0	0	0	0	0	ATTGAGTGCAGCGTTGATGT	20
nta-miR477a	0	0.0364258	0	0	0.0347157	0	0	0	0	0	0	0	0	0	0	0	0	0.0329298	ACTCTCCCTCAAGGGCTTCTG	21
nta-miR477b	0	0	0	0	0	0	0	0	0	0	0	0	0	0.0304943	0	0	0	0	TCTCTCCCTCAAGGGCTTCTC	21
osa-miR11336-5p	0	0	0	0	0	0.0333634	0	0	0	0	0	0	0	0	0	0	0	0	GACTTTCTAGCGTTGCCCACATTC	24
osa-miR1320-5p	0	0	0	0	0	0	0	0	0	0.0329179	0	0	0	0	0	0	0	0	TGGAACGGAGGAATTTTATAG	21
osa-miR1426	0.0336732	0	0	0	0.0347157	0	0	0	0.0511043	0.0329179	0	0	0	0	0	0	0	0	AGAATCTTGATGATGATTAAA	21
osa-miR1429-5p	0	0	0	0	0	0	0	0	0	0	0	0	0	0	0	0	0	0.0329298	GTAATATACTAATCCGTGCAT	21
osa-miR1439	0.0336732	0	0.0339315	0.107608	0	0.0667267	0.0971891	0.0741536	0	0.0329179	0.104159	0	0.0677337	0	0.0315835	0	0	0.0329298	TTTTGGAACGGAGTGAGTATT	21
osa-miR156f-3p>osa-miR156h-3p>osa-miR156l-3p>zma-miR156d-3p>zma-miR156f-3p>zma-miR156g-3p	0.0336732	0	0	0	0	0	0	0	0	0	0	0	0	0	0	0	0	0	GCTCACTTCTCTTTCTGTCAGC	22
osa-miR156l-5p	1.51529	0.910645	1.39119	1.14782	1.70107	0.934174	0.71272	1.14938	0.459939	0.822947	1.49295	0.369882	1.01601	2.71399	0.852756	0.79274	0.919684	0.592736	CGACAGAAGAGAGTGAGCATA	21
osa-miR159c	0.0673463	0.0728516	0.101795	0	1.73579	0.266907	0	1.37184	0.664356	0.164589	0.347198	29.4796	0.101601	0.0304943	2.1161	0.0689339	0.647185	0.823245	ATTGGATTGAAGGGAGCTCCA	21
osa-miR159d	0.235712	0.218555	4.07179	0.251086	0.138863	0.233544	15.5503	17.6856	0.0511043	0.296261	0.0694396	1.07266	15.3078	0.182966	0.189501	0.34467	0	0	ATTGGATTGAAGGGAGCTCCG	21
osa-miR159f	254.232	2.62266	185.131	204.994	2.60368	3.10279	4.37351	2.18753	3.83282	5.56312	4.3747	154.241	4.36882	136.889	134.198	98.6444	75.925	136.889	CTTGGATTGAAGGGAGCTCTA	21
osa-miR164e	30.4069	18.3586	0.101795	0.107608	29.7861	11.2768	22.9042	13.6072	10.8852	32.2266	0.0694396	0.110965	21.099	0.0609886	14.9074	4.23944	4.83686	4.21501	TGGAGAAGCAGGGCACGTGAG	21
osa-miR166c-5p	0	0	0	0	0	0	0	0.0370768	0	0	0	0	0.0677337	0	0	0	0	0	GGAATGTTGTCTGGTCCGAG	20
osa-miR166e-3p	1.58264	1.34775	1.2894	0.860867	1.80522	1.7349	0.842306	1.03815	1.07319	1.11921	1.04159	1.51652	0.508003	0.884334	0.758005	0.275736	0.613123	0.658596	TCGAACCAGGCTTCATTCCCC	21
osa-miR166g-5p	0	0	0	0	0	0	0.0323964	0.0370768	0	0.0329179	0	0	0	0.0304943	0	0	0.0340624	0.0658596	AATGGAGGCTGATCCAAGATC	21
osa-miR166i-3p	0.101019	0.109277	0.271452	0.107608	0.208294	0.30027	0.226775	0.222461	0.35773	0.263343	0.173599	0.147953	0.0338668	0	0.126334	0.172335	0.238437	0.329298	TCGGATCAGGCTTCATTCCTC	21
osa-miR166k-5p	0	0.0364258	0	0.0358695	0	0	0	0	0	0.0329179	0.0694396	0	0	0.0304943	0	0	0.0340624	0	GGTTTGTTGTCTGGCTCGAGG	21
osa-miR168b	0	0	0	0	0	0	0	0	0	0	0	0.0369882	0	0	0	0	0	0	AGGCTTGGTGCAGCTCGGGAA	21
osa-miR171c-5p	0	0	0	0.0717389	0	0.0667267	0	0.0370768	0	0	0	0.0369882	0	0	0	0	0	0	GGATATTGGTGCGGTTCAATC	21
osa-miR171e-5p>zma-miR171d-5p>zma-miR171e-5p	0.0673463	0	0.0339315	0	0.0694315	0.133453	3.30443	3.33691	2.14638	0.329179	0.173599	0.739764	0.101601	0.121977	0.0947506	0.172335	0.238437	0.0987894	TGTTGGCTCGGCTCACTCAGA	21
osa-miR171g>sbi-miR171c>zma-miR171g-3p	0	0	0	0	0	0	0	0	0	0.0329179	0	0	0	0	0	0	0	0	GAGGTGAGCCGAGCCAATATC	21
osa-miR171h>sbi-miR171e>zma-miR171k-3p>zma-miR171h-3p	0	0.109277	0.271452	0	0.0694315	0.166817	0	0.11123	0.0511043	0	0	0	0.0338668	0	0	0	0.0681248	0	GTGAGCCGAACCAATATCACT	21
osa-miR1846d-5p	0	0	0	0	0	0	0	0	0	0	0	0	0	0	0	0.0689339	0	0	TCCCACCGAGCAGCCGGATCTC	22
osa-miR1860-5p	0	0	0	0	0	0	0	0	0	0	0	0	0.0338668	0	0	0	0	0	AGAAAACCAGCTTCCAGATCT	21
osa-miR1862d	0	0	0	0	0	0	0	0	0	0.0329179	0.0347198	0	0	0	0	0	0	0	ACTAGGTTTGTTTATTTTGGGACG	24
osa-miR1863a	0.0336732	0	0	0	0	0	0	0	0	0	0	0	0	0	0	0	0	0	AGCTCTGATACCATGTTAGATTAG	24
osa-miR1863b	0	0	0	0	0	0	0	0	0.0511043	0	0	0	0	0	0	0	0	0	AGCTCTGATACCATGTTAACTGTT	24
osa-miR1871	0.0673463	0	0	0.0717389	0.0347157	0.0333634	0.0323964	0	0	0.0329179	0.0347198	0.110965	0.101601	0	0	0.034467	0.0340624	0	ATGGCTCTGATATCATGTTGGTTT	24
osa-miR1873	0	0	0.0678631	0	0	0.0667267	0	0.0370768	0	0	0.104159	0	0	0	0	0	0	0	TCAACATGGTATCAGAGCTGGAAG	24
osa-miR1879	0	0	0.0678631	0	0	0	0	0	0	0.0329179	0	0	0	0	0	0	0	0	GTGTTTGGTTTAGGGATGAGGTGG	24
osa-miR1882e-3p	0	0	0	0	0	0	0	0	0	0.0329179	0	0	0	0	0	0	0	0	GAAATGATCTTGGACGTAATCTAG	24
osa-miR2094-5p	0	0	0	0	0	0.0333634	0	0	0	0	0	0	0	0	0	0	0	0	TGGCTGCTAGGCTCCTGGGTG	21
osa-miR2102-3p	0	0	0	0	0	0	0	0	0	0	0	0	0.0338668	0	0	0	0	0	CATGGTGCCGGTTCCGGTGGCG	22
osa-miR2880	0	0	0.0339315	0	0	0	0	0	0	0	0	0	0	0	0	0	0	0	ACGGTATCCCGTTCGGACAGGATG	24
osa-miR319a-3p.2-3p>osa-miR319b>sbi-miR319a>sbi-miR319b>zma-miR319a-3p>zma-miR319c-3p>zma-miR319b-3p>zma-miR319d-3p	0	0	0.0339315	0.322825	0	0.20018	0	0	0	0.0987536	0.0347198	0	0	0.0609886	0.0315835	0	0	0	TTGGACTGAAGGGTGCTCCC	20
osa-miR319a-5p	0	0	0	0	0	0	0	0	0	0	0	0.0369882	0	0	0	0	0	0	AGCTGCCGAATCATCCATTCA	21
osa-miR395a>sbi-miR395l	0	0	0.0339315	0	0	0.0333634	0	0.0370768	0	0.0329179	0	0	0	0.0304943	0	0	0	0	GTGAAGTGCTTGGGGGAACTC	21
osa-miR395b>osa-miR395d>osa-miR395e>osa-miR395g>osa-miR395h>osa-miR395i>osa-miR395j>osa-miR395k>osa-miR395l>osa-miR395s>osa-miR395m>osa-miR395n>osa-miR395p>osa-miR395q>osa-miR395r>osa-miR395y>sbi-miR395b>sbi-miR395a>sbi-miR395d>sbi-miR395e>sbi-miR395c>sbi-miR395g>sbi-miR395h>sbi-miR395i>sbi-miR395j>tae-miR395a>zma-miR395b-3p>zma-miR395a-3p>zma-miR395d-3p>zma-miR395e-3p>zma-miR395f-3p>zma-miR395g-…	1.11121	1.01992	0	0.251086	0	0.0333634	0.0647927	2.96614	0	0	0.0347198	0	0	0	0	0.79274	0	0.790315	GTGAAGTGTTTGGGGGAACTC	21
osa-miR395t	0	0	0	0	0	0	0	0.0741536	0	0	0	0	0	0	0	0	0	0	GTGAAGTGTTTGGGGAAACTC	21
osa-miR396a-3p>osa-miR396b-3p	5.32036	1.38418	56.3603	2.25978	5.76281	0.0333634	136.842	40.5249	69.553	0.0658357	43.1915	10.7266	25.4679	6.06836	8.11697	8.75461	1.12406	79.0315	GTTCAATAAAGCTGTGGGAA	20
osa-miR396f-5p	0	0	0	0	0	0	0	0	0	0	0	0	0	0	0	0.034467	0	0	TCTCCACAGGCTTTCTTGAACT	22
osa-miR397b	0.538771	0.509961	0.712562	0.251086	0.138863	0.366997	9.8161	3.78183	5.46816	0.230425	0	0	0.237068	0.0914829	0.44217	3.82583	3.54249	2.37095	TTATTGAGTGCAGCGTTGATG	21
osa-miR3980a-3p>osa-miR3980b-3p	0.0673463	0	0	0	0	0	0	0	0	0	0	0	0	0	0	0	0	0	CTGGCCGAGGCCGTCGATTCT	21
osa-miR414	0	0.0364258	0.0339315	0	0	0.0333634	0	0	0	0.0329179	0	0	0	0	0	0	0	0	TCATCCTCATCATCATCGTCC	21
osa-miR5074	0.0336732	0	0	0	0	0	0	0	0	0	0	0	0	0	0	0	0	0	GAAGGCCACCGTCGGGATCGC	21
osa-miR5077	0.471424	0.109277	0.576836	0.322825	0.590167	0.700631	0.485945	0.704459	0.35773	0.559604	0.867995	0.554823	0.270935	0.396426	0.473753	0.172335	0.442811	0.296368	GTTCGCGTCGGGTTCACCA	19
osa-miR5083	0	0	0	0.0717389	0	0	0.0323964	0	0	0	0	0	0	0	0	0	0	0	AGACTACAATTATCTGATCA	20
osa-miR5148a>osa-miR5148b>osa-miR5148c	0	0	0.0339315	0	0	0	0	0	0	0	0	0	0	0	0	0	0	0	TGAGGGGTAGAAATGTCATATCAT	24
osa-miR5161	0	0	0	0	0	0	0	0	0	0	0	0	0	0	0	0	0	0.0329298	TCTGGATCAGAGGGAGTATA	20
osa-miR529a>sbi-miR529	0	0	0	0	0	0	0	0	0.0511043	0	0	0	0	0	0	0	0	0	CTGTACCCTCTCTCTTCTTC	20
osa-miR530-5p	0	0.0364258	0	0	0	0	0	0	0	0	0	0	0	0	0	0	0	0	TGCATTTGCACCTGCACCTA	20
osa-miR5517	0	0	0	0	0	0	0	0	0	0	0	0	0.0338668	0	0	0	0	0	TGCATCACGGCGCATATGTAG	21
osa-miR5523	0	0	0	0	0	0	0	0	0	0	0	0	0.0338668	0	0	0	0	0	TGAGGAGGAACATATTTACTAG	22
osa-miR5533	0	0	0	0	0	0.0333634	0	0	0	0	0	0	0	0	0	0	0	0	CTTTGCCAGAAGCCCTCATGG	21
osa-miR5534a	0	0	0	0	0	0	0	0	0	0	0	0.0369882	0	0	0	0	0	0	TGACGACAACAGCTAGAATGG	21
osa-miR5538	0	0	0.0678631	0.107608	0	0.133453	0	0.0370768	0	0.0329179	0.0347198	0	0	0.0304943	0.0315835	0	0	0	ACTGAACTCAATCACTTGCTGC	22
osa-miR5544	0	0	0	0	0	0.0333634	0	0	0	0	0	0	0	0	0	0	0	0	AGAACACGGAGTAGAAGTTGGT	22
osa-miR5812	0	0	0	0	0	0.0333634	0	0	0	0	0	0	0	0	0	0	0	0	AGCAACGATTTTAAGATTGTGGCA	24
osa-miR5836	0	0	0	0	0	0	0	0	0	0	0.0347198	0	0	0	0	0	0	0	TGAGCAGCCGGACCATGGGAT	21
osa-miR6248	0	0	0	0	0	0	0	0	0	0	0	0	0	0	0.0315835	0	0	0	TATTTGAGGATGGAGGTAGTA	21
osa-miR6249a>osa-miR6249b	0	0	0	0	0	0	0	0	0.102209	0	0	0	0	0	0	0	0	0	CGTGAAGAGCTCGCCGGCGGC	21
osa-miR7693-3p	0	0.0364258	0	0.0717389	0	0	0	0	0	0	0	0	0	0	0	0	0	0	GACGTCCATCGATGAAGAGCGA	22
osa-miR7693-5p	0.0336732	0	0	0	0	0	0	0	0	0	0	0	0	0	0	0	0	0	GTTTCCGCTCTTCATCGATGGCTG	24
osa-miR812n-3p>osa-miR812t>osa-miR812u	0	0	0	0	0	0	0	0	0	0.0329179	0	0	0	0	0	0	0	0	ACGGAAAATCATGGCTGCACTTAA	24
pab-miR11418	0	0	0	0	0	0	0	0	0	0	0.0347198	0.0369882	0	0	0	0	0	0	ACCCACCGCCGCTGCCGCCGC	21
pab-miR11419	0	0	0	0	0	0.0333634	0	0	0	0	0	0	0	0	0	0	0	0	ACCTAAACTGCTCAAACACTG	21
pab-miR11423a	0	0	0	0	0	0	0	0	0	0	0	0	0	0	0	0.034467	0	0	ACTGGGAAACGTCGTCGGCCGT	22
pab-miR11427a>pab-miR11427b	0	0.0728516	0	0	0	0.0333634	0	0	0	0	0.0347198	0.0369882	0	0.0304943	0	0.034467	0	0.0329298	AGACCGAAGGCGAGAATGGAGC	22
pab-miR11482	0	0	0	0	0	0	0	0.0370768	0	0	0	0	0	0	0	0	0	0	TAACCAGTCCTTCTGCAATCCA	22
pab-miR11493a>pab-miR11493b>pab-miR11493c	0	0	0	0	0	0	0	0	0	0	0	0	0	0	0	0	0.0340624	0	TAGTGTTGAGAAGATTGAGGA	21
pab-miR11509	0	0	0	0	0	0	0	0	0	0	0	0	0	0.0304943	0	0	0	0	TCATGAGCATTGTGGATGATC	21
pab-miR11520	0	0	0	0	0	0	0	0	0	0.0329179	0	0	0	0	0	0	0	0	TCGTTGGGATCTTTTCTGCCT	21
pab-miR11524	0	0	0	0	0	0	0.0323964	0	0	0	0	0	0	0	0	0	0	0	TCTCCGGCGGCGTTCTTTGCTG	22
pab-miR11564a>pab-miR11564b	0	0	0.0339315	0	0	0	0	0.0370768	0.0511043	0.0658357	0	0.0369882	0	0	0	0.034467	0	0	TTGACCACAAAATCCACATTG	21
pab-miR156ab	0	0	0	0	0.0694315	0	0	0	0	0.0329179	0.0694396	0	0	0.0304943	0.0315835	0.034467	0	0	TTGACAGGAGATAGAGAGCAC	21
pab-miR156b>pab-miR156c>pab-miR156d>pab-miR156e>pab-miR156f>pab-miR156g>pab-miR156h>pab-miR156i>pab-miR156j>pab-miR156k	4.47853	0.655665	1.11974	1.00435	0.694315	0.934174	0.809909	0.556152	0.511043	0.9217	0.590237	0.739764	0.812804	0.945323	1.07384	0.482537	0.544998	0.856175	TGACAGAAGAGAGTGGGCAC	20
pab-miR159a	0	0.0364258	0.0678631	0	0.0347157	0.166817	0	0	0	0.0987536	0	0	0	0.121977	0.0315835	0	0.0340624	0	TTGGTTTGAAGGGAGCTCTAC	21
pab-miR159d	0.505097	0.291406	0.576836	0.430434	0.347157	0.433724	0.226775	0.0741536	0.204417	0.427932	0.381918	0.40687	0.203201	0.152471	0.505337	0	0.102187	0.197579	TTTGGATTGAAGAGAGCTCCC	21
pab-miR159e>pab-miR159j>pab-miR159k	0	0	0.0339315	0	0	0	0	0	0	0	0	0	0	0	0.0315835	0	0	0	CTTGGATTCAAGGGAGCTCCT	21
pab-miR160c>pab-miR160e>pab-miR160f	0	0	1.05188	0	0	1.20108	2.46212	1.40892	0	1.25088	1.24991	1.03567	0	2.37855	0.0631671	0.654872	0	0.0658596	CTGCCTGGCTCCCTGTATGCC	21
pab-miR164b	0	0	0	0	0	0	0	0.0370768	0	0	0	0	0	0	0	0	0	0	CATGTGCTCTTTTTCTCCATC	21
pab-miR166c>pab-miR166d	0.0336732	0.109277	0.101795	0.0717389	0.0347157	0.0333634	0	0.0741536	0.0511043	0	0.104159	0	0.0338668	0	0	0.0689339	0.0340624	0.0329298	CCGGACCAGGCTTCATCCCCT	21
pab-miR166j	5.0173	4.62608	5.7005	4.41194	5.48508	5.60505	3.04526	4.81998	3.5262	3.75264	4.3747	5.17835	2.37068	3.87277	4.01111	3.13649	3.33811	3.98451	CCGGACCAGGCTTCATTCCCC	21
pab-miR171a	0	0	0	0	0	0	0	0.11123	0	0	0	0	0.0677337	0.0304943	0	0.034467	0	0	TTGAGCCGTGCCAATATCGCA	21
pab-miR1863	0	0	0	0.0358695	0	0	0	0	0	0	0	0	0	0	0	0	0	0	AGCTCTGGTACCATGTTAGATT	22
pab-miR319d>pab-miR319h	1.41427	0.546387	0.984015	2.00869	1.42334	1.33453	0.226775	0.556152	0.35773	1.05337	1.24991	1.5535	1.18534	0.884334	0.758005	0.241269	0.102187	0.0329298	TTGGACTGAAGGGAGCGCCC	20
pab-miR319e	0.101019	0.0728516	0.169658	0.107608	0.24301	0.233544	0.129585	0.185384	0	0.197507	0.104159	0.221929	0.169334	0.121977	0.0631671	0	0	0.0329298	TTGAACTGAAGGGAGCTCCC	20
pab-miR319j	0	0	0	0.0358695	0	0.0333634	0	0	0	0	0	0.0369882	0	0	0.0315835	0	0	0	CTTGGCCTGAAGGGAGCTCC	20
pab-miR3627f	0	0	0	0	0	0	0	0	0	0	0.0347198	0	0	0	0	0	0	0	TGCGCAGAAGAGATGACACGGT	22
pab-miR3710i	0.0336732	0	0	0	0	0	0	0	0	0	0	0	0	0	0	0	0	0	CAGGTCAAGACTTTGGAGGCC	21
pab-miR3711	1.68366	1.56631	1.39119	1.43478	2.25652	2.80252	1.36065	1.92799	1.1754	2.07383	1.77071	2.33026	0.677337	1.15878	1.48443	1.44761	1.22625	1.18547	TGGCGCTAGAAGGAGGGCCT	20
pab-miR394a>pab-miR394b	0.235712	0.0728516	0.169658	0.107608	0.0347157	0.133453	0	0	0.102209	0.131671	0.0347198	0.0369882	0.135467	0.0304943	0.0947506	0.034467	0	0.0329298	CTGGCATTCTGTCCACCTCC	20
pab-miR395	0	0	0	0	0.0347157	0	0	0	0	0	0	0	0	0	0	0	0	0	CTGAAGTGTTTGGAGGAACTT	21
pab-miR396a-3p>pab-miR396d>pab-miR396e	0.0336732	0	0	0	0	0	0	0	0	0	0	0	0	0	0	0	0	0	CTCAAGAAAGCTGTGGGAAA	20
pab-miR396a-5p>vvi-miR396a	9.46216	5.17246	11.2992	15.1369	11.5603	11.9774	10.9824	29.4019	13.1338	34.86	8.99243	8.21138	9.27951	13.7834	11.3069	8.6512	44.3492	6.78354	TTCCACAGCTTTCTTGAACTA	21
pab-miR396b>pab-miR396c>pab-miR396i>pab-miR396j>pab-miR396k>pab-miR396l>pab-miR396m>pab-miR396n>pab-miR396o>pab-miR396p>pab-miR396q>pab-miR396r>pab-miR396s>pab-miR396t>ptc-miR396g-5p>tcc-miR396d	0.0673463	0.109277	0.0339315	0.107608	0.624883	0.10009	0.161982	0.370768	0.102209	0.0329179	0.0694396	0.0739764	0.338668	0.182966	0.0947506	0.103401	0.0340624	0.0987894	TTCCACGGCTTTCTTGAACTT	21
pab-miR396f>pde-miR396	0	0	0	0	0	0	0	0.0370768	0.102209	0	0	0	0	0	0	0	0	0	TCCCACGGCTTTCTTGAACTT	21
pab-miR397a>pab-miR397c>pab-miR397d>pab-miR397f>pab-miR397g>pab-miR397h	0.0673463	0	0	0	0	0	0.0323964	0.0370768	0.0511043	0	0	0	0	0	0	0.0689339	0	0.0987894	TATTGAGTGCAGCGTTGACGA	21
pab-miR397b	0.0673463	0.0364258	0.101795	0	0	0.0333634	0.323964	0.0741536	0.613252	0	0	0	0.0338668	0	0.0315835	0.172335	0.0681248	0	TCATTGAGTGCAGCGTTGACG	21
pab-miR397e>pab-miR397i	0	0	0.0678631	0	0	0	0	0	0	0	0	0	0	0	0	0.034467	0	0	TATTGAGTGCAGCGTTGACGG	21
pab-miR397j>pab-miR397k>pab-miR397l	0	0	0.0339315	0	0	0	0	0	0	0	0	0	0	0	0	0	0	0	TCATCATTGAGTGCAGCATTG	21
pab-miR398a	0	0	0	0	0	0	0	0.0370768	0	0	0	0	0.0338668	0	0	0	0	0	CGTGTTCTCAGGTCACCCCTG	21
pab-miR399b>pab-miR399c>tcc-miR399a>vvi-miR399i	0	0	0	0	0.0347157	0	0	0	0	0	0	0	0.0338668	0	0	0	0	0	CGCCAAAGGAGAGTTGCCCTG	21
pab-miR482l	0	0	0.0339315	0	0	0.0333634	0	0.0370768	0	0.0329179	0	0	0	0	0.0315835	0	0	0	TTTTTCCTACACCTCCCAACCC	22
pab-miR482t>pab-miR482u>pab-miR482v>pab-miR482e>pab-miR482f	0	0	0	0	0	0	0	0	0	0	0.0347198	0	0	0	0	0	0	0	TCTTTCCACTTCTACCCATTTC	22
pab-miR858a	0.437751	1.78486	0.305384	7.03042	0.381873	0.633904	0.35636	0.11123	0.255522	0.855865	0.590237	0.480847	1.01601	0.823346	5.27445	0.275736	0.0681248	0.954964	TTCGTTGTCTGTTCGACCCTG	21
pab-miR946d	0	0	0	0	0	0	0	0	0	0	0	0	0	0.0304943	0	0	0	0	CAGCCCTTCTGCTATCCACAAC	22
pde-miR159	0.572444	0.400684	0.407179	0.394564	0.347157	0.433724	0.259171	0.407845	0.153313	0.46085	0.347198	0.369882	0.372535	0.487909	0.410586	0.379136	0.170312	0.230509	TTTGGTTTGAAGGGAGCTCTA	21
pde-miR169	0	0	0	0	0	0.0333634	0	0	0	0	0.0347198	0	0	0	0	0	0	0	CAGCCAAGGATGACTTGCCTA	21
pde-miR390>pta-miR390	0	0	0	0	0	0	0	0	0.0511043	0	0	0	0	0	0	0	0	0	AAGCCCAGGATGGATAGCGCC	21
peu-miR2916	0.538771	0.764942	0.542905	0.0717389	0.277726	0.133453	0.485945	0.519075	0.35773	0.164589	0.243039	0.0369882	0.135467	0.0914829	0.252668	0.0689339	0.238437	0.164649	TGGGGACTCGAAGACGATCATAT	23
pgi-miR2118	0.0673463	0	0	0	0	0	0	0	0	0	0	0	0	0	0	0	0	0	TTTCCTATTCCACCCATCCCAT	22
pgi-miR6138	0.0336732	0.0364258	0	0.0358695	0.0347157	0.0333634	0	0.11123	0	0.0987536	0	0	0.0338668	0	0.126334	0	0.0340624	0	TACGTTTGGATTGAAGGAATGAAA	24
pla-miR11602	0.0336732	0.0728516	0.0339315	0.0358695	0.0347157	0.166817	0.0647927	0.0741536	0	0.0658357	0.0694396	0.0369882	0.0677337	0.0304943	0.126334	0	0.0340624	0	TCTAACGGAACGCTATTGGATC	22
pla-miR11604	0	0	0	0	0.0347157	0	0	0	0	0.0329179	0	0	0	0	0	0	0	0	TCCAGAGGGAGAACGTGGCGA	21
pla-miR11606	0.0673463	0	0.0678631	0.0717389	0	0.0333634	0	0	0.0511043	0.0658357	0	0	0	0.0304943	0.157918	0	0	0	TGGTGGACTCCAATTCGCATA	21
pla-miR11610	0	0	0.0339315	0	0	0	0	0	0	0	0	0	0	0	0	0	0	0	ACAGATATGGTAGGGGGCACA	21
ppe-miR1511-5p	0	0	0.0339315	0.0358695	0.173579	0.10009	0.0647927	0.0370768	0.0511043	0	0	0.0369882	0.0338668	0	0.0315835	0	0	0	CGTGGTATCAGAGTCATGTTA	21
ppe-miR171d-5p	0	0	0	0	0	0	0	0	0	0	0	0	0.0338668	0	0	0	0	0	TGTGATATTGGTTCGGTTCATA	22
ppe-miR171e	0	0	0.0339315	0	0	0	0	0	0	0	0	0	0	0	0	0	0	0	TTATTGAACCGGACCAATATC	21
ppe-miR172a-5p	0.269385	0.0728516	0	0.322825	0.0694315	0.366997	0.194378	0.148307	0.204417	0.296261	0.0694396	0.110965	0.135467	0.487909	0.0631671	0.103401	0	0.0658596	GTAGCATCATCAAGATTCACG	21
ppe-miR319b	0	0	0.0339315	0	0	0	0	0	0	0	0	0	0	0	0	0	0	0	TAGCTGCCGAGTCATTCATCCA	22
ppe-miR393a	0	0	0	0	0	0	0	0	0	0	0	0	0	0	0	0	0.0340624	0	CATCCAAAGGGATCGCATTGA	21
ppe-miR395a-3p>ppe-miR395b-3p	0	0	0	0.0358695	0	0	0	0.0741536	0	0	0.0694396	0	0.0338668	0	0	0.034467	0	0	CTGAAGTGTTTGGGGGGACCC	21
ppe-miR396a	8.62033	5.35459	7.73639	46.3792	11.5256	50.7123	7.83992	8.82428	9.24988	9.11825	9.20075	12.428	34.1716	11.5573	11.1174	8.341	4.08749	4.51138	TTCCACAGCTTTCTTGAACGT	21
ppe-miR398b	0.0673463	0.0364258	0	0	0	0.0333634	0.0647927	0.222461	0.153313	0.0329179	0	0	0	0.0304943	0.0315835	0.172335	0.13625	0.131719	CGTGTTCTCAGGTCGCCCCTG	21
ppe-miR399a	0	0	0	0	0	0	0	0	0	0	0	0	0	0	0	0	0.0340624	0	CGCCAAAGGAGAGTTGCCCTT	21
ppe-miR399b	0	0	0	0.0717389	0	0	0.0323964	0	0	0	0	0	0	0.0304943	0.0315835	0	0	0	TCTGCCAAAGGAGAATTGCCC	21
ppe-miR6260	0.0336732	0	0	0	0	0	0	0	0	0	0.0694396	0	0	0	0	0	0	0	TGGAGTGAGAGAATGGGAGGT	21
ppe-miR6281	0	0	0	0	0.0347157	0	0	0	0	0	0	0	0	0	0	0	0	0	GTTAGAGATAGAGAGAGTGAG	21
ppe-miR8133-3p	0	0	0	0	0	0	0	0	0	0	0	0.0739764	0	0.0304943	0	0	0	0	TAACTTCCGAACGTCCGCATA	21
ppt-miR1023a-5p	0	0	0	0	0	0	0	0	0	0.0329179	0	0	0	0	0	0	0	0	ACACTCTCTCCATTTCTCTAC	21
ppt-miR1027a>ppt-miR1027b>ppt-miR1027c	0	0	0.0339315	0	0	0	0	0	0	0	0	0	0	0	0	0	0	0	TTTCTATCTTCTCTTCCAATC	21
ppt-miR1042-3p	0	0	0	0	0.0347157	0	0	0	0	0	0	0	0	0	0	0	0	0	TGTCTAGTCTCTCCACGGCCCG	22
ppt-miR1054	0	0	0	0	0	0	0	0	0	0.0329179	0	0	0	0	0	0	0	0	TAAACCCTCTCTCTATTCCTG	21
ppt-miR160b>ppt-miR160i	0	0.0364258	0.169658	0.0717389	0.104147	0.0333634	0.0323964	0.0741536	0.0511043	0.0329179	0	0	0	0.0304943	0.0631671	0.103401	0.272499	0.164649	CGCCTGGCTCCCTGTATGCCA	21
ppt-miR160h	0	0	0	0	0	0	0	0	0	0	0	0	0	0.0609886	0	0	0	0	CGCCTGGCTCCTTGTATGCCA	21
ppt-miR166j>ppt-miR166k>ppt-miR166l	0.168366	0.655665	0.339315	0.215217	0.312442	0.433724	0.194378	0.593229	0.204417	0.164589	0.173599	0.332894	0	0.0609886	0.126334	0.0689339	0.0681248	0.0329298	TCCGGACCAGGCTTCATTCCC	21
ppt-miR166m	0.101019	0.0728516	0.135726	0.0717389	0.138863	0.0333634	0.0323964	0.11123	0.0511043	0.0658357	0.0694396	0	0	0.121977	0.0631671	0.034467	0.0340624	0.0329298	TCGGACCAGGCATCATTCCTT	21
ppt-miR167	0.134693	0.0364258	0.0339315	0.0358695	0.0694315	0	0	0	0.102209	0.0658357	0.0694396	0	0	0.0304943	0.0631671	0	0	0	GGAAGCTGCCAGCATGATCCT	21
ppt-miR171a>smo-miR171d	0	0	0	0	0	0	0	0	0	0	0	0	0.0338668	0	0	0	0	0	TGAGCCGCGCCAATATCACAT	21
ppt-miR171b	0.303058	0.145703	0.169658	0.143478	0.0694315	0	0.226775	0.11123	0.204417	0.164589	0.208319	0	0	0.0304943	0.126334	0.103401	0.0681248	0.0987894	TTGAGCCGCGCCAATATCACA	21
ppt-miR2082	0.101019	0	0.0339315	0.107608	0.0347157	0.0333634	0	0	0.0511043	0	0	0	0.0677337	0	0.0315835	0.0689339	0.0340624	0.0329298	TGTGTGTTCCGCTTCTTCTTT	21
ppt-miR2084	0	0	0	0	0	0	0	0	0	0	0	0	0	0	0.0315835	0	0	0	CCTGCATTGTTGGATTGTGGA	21
ppt-miR319a>ppt-miR319b>sly-miR319a	7.57646	0.947071	28.5704	1.54239	11.3868	4.07033	0.129585	0	0.204417	0.164589	51.3853	2.07134	4.23335	2.28707	2.14768	0.758273	3.20186	0.131719	CTTGGACTGAAGGGAGCTCC	20
ppt-miR390c-5p	0.0336732	0.254981	0.0678631	0	0.0347157	0	0.194378	0.222461	0.153313	0.0658357	0.0694396	0.0369882	0	0.0304943	0.0947506	0	0.102187	0	GAGCTCAGGAGGGATAGCGCC	21
ppt-miR395	0	0	0	0	0	0	0.0323964	0	0	0	0	0	0	0	0	0	0	0	CTGAAGCGTTTGGGGGAAGG	20
ppt-miR477h	0	0	0	0	0	0	0	0	0	0	0	0	0.0338668	0	0	0	0	0	TCTCCCTCAAAGGCTTCCA	19
ppt-miR529g	0	0	0.0339315	0	0	0	0	0.0370768	0	0	0	0	0	0	0	0	0	0	CGAAGAGAGAGAGCACAGTCC	21
ppt-miR894	0.202039	0.0728516	0.169658	0.0717389	0.208294	0.0667267	0.226775	0.11123	0.153313	0.329179	0.243039	0.258917	0.0338668	0.243954	0.252668	0.275736	0.0340624	0.230509	CGTTTCACGTCGGGTTCACC	20
ppt-miR903	0	0	0	0	0	0	0	0	0	0	0	0.0369882	0	0	0	0	0	0	GCTACTTCGGCGGGACAAGAGC	22
pta-miR156b	0	0	0	0	0	0	0	0	0	0	0	0	0	0	0.0315835	0	0	0	CAGAAGATAGAGAGCACAAC	20
pta-miR159a	3.70405	1.2749	1.49299	7.49672	2.91612	1.76826	0.874702	0	13.236	2.83094	1.90959	0	2.09974	2.31757	0	0.689339	9.40122	10.0436	TTGGATTGAAGGGAGCTCCA	20
pta-miR159b	0.101019	0	0	0	0.104147	0	0.0323964	0	0.0511043	0	0.138879	0	0	0.0304943	0	0	0	0	TTGGATTGAAGAGAGCTCCC	20
pta-miR159c>smo-miR159	2.02039	1.78486	1.9341	0.860867	0.659599	0.133453	0.550738	2.48415	0.511043	0.131671	3.36782	0.961693	0.0338668	0.762357	0.0315835	0.44807	0.13625	0.197579	CTTGGATTGAAGGGAGCTCCC	21
pta-miR319	0.875502	0	1.56085	3.4076	7.77632	0	0.0647927	0	0.255522	0	0.520797	4.95642	0	0.487909	0	0.310203	0	0.526877	TTGGACTGAAGGGAGCTCC	19
pta-miR950a>pta-miR950b	0	0	0	0	0	0	0	0	0	0	0	0	0	0	0	0	0.0340624	0	TCAGGTCCTCGGTGGTTTAT	20
ptc-miR159d>sbi-miR159b>sof-miR159c>zma-miR159c-3p>zma-miR159d-3p	0.0673463	0.0728516	30.8438	0.0358695	0.937325	4.30387	0	0.519075	0.153313	1.21796	0.590237	3.18099	0.677337	26.53	0.726422	0.206802	1.39656	0	CTTGGATTGAAGGGAGCTCCT	21
ptc-miR166p	0.841829	0.254981	0.610768	0.466303	0.381873	0.733994	0.35636	0.556152	0.408835	0.427932	0.520797	0.40687	0.270935	0.42692	0.410586	0.206802	0.442811	0.362228	TCGGACCAGGCTCCATTCCTT	21
ptc-miR167h-5p	0.202039	0.0728516	0.135726	0.215217	0.138863	0.166817	0.0647927	0.0370768	0.153313	0.263343	0.277759	0.0739764	0.0338668	0.152471	0.126334	0.172335	0	0.0658596	TGAAGCTGCCAACATGATCTG	21
ptc-miR169b-3p	0	0	0	0.0717389	0	0	0	0	0	0	0	0	0	0	0	0	0	0	GGCAGGTTGTTCTTGGCTAC	20
ptc-miR169u-3p	0	0	0	0	0	0	0	0	0.0511043	0	0	0	0	0	0	0	0	0	GGCAGTCTCCTTTGGCTATCC	21
ptc-miR169x	0	0	0.0339315	0	0	0	0	0	0	0	0	0	0	0	0	0	0	0	TAGCCAAGGATGACTTGCTCG	21
ptc-miR171k	0.0673463	0	0	0	0	0	0.0647927	0	0	0.131671	0	0	0.0338668	0	0	0	0	0	GGATTGAGCCGCGCCAATATC	21
ptc-miR172i	0	0	0.0339315	0	0	0.0333634	0	0	0.0511043	0	0	0.0369882	0	0	0.0315835	0	0	0	AGAATCCTGATGATGCTGCAA	21
ptc-miR319i	0.673463	0.801368	0.373247	1.18369	0.555452	0.900811	0.35636	0.407845	0.102209	0.592522	0.520797	0.924705	0.440269	0.792852	0.53692	0.034467	0.13625	0.0329298	TTGGGCTGAAGGGAGCTCCC	20
ptc-miR3627a	0	0	0	0	0	0	0	0	0	0	0.0347198	0	0	0	0	0	0	0	TCTGTCGCTGGAAAGATGGTAC	22
ptc-miR390d-3p>sly-miR390a-3p	0.707136	0.145703	0.0678631	0.0358695	0.138863	0.0333634	0	0.259538	0.255522	0.0329179	0.104159	0.184941	0.0338668	0.0304943	0.0947506	0.310203	0.204374	0.395158	CGCTATCCATCCTGAGTTTTA	21
ptc-miR6427-3p	0	0	0	0	0	0.0333634	0	0	0	0	0	0	0	0.0304943	0	0	0	0	GTGGGAATGAACATTATGAGA	21
ptc-miR6428	0	0	0	0	0	0	0	0	0	0	0	0.0369882	0	0	0	0	0	0	TCTGGCAACTCATTAGACTCAT	22
ptc-miR6437b>ptc-miR6437a	0	0	0	0	0	0	0	0	0.0511043	0	0	0	0	0	0	0	0	0	TCACGGACGGCGGCTCCAAGCA	22
ptc-miR6459a-3p	0	0	0	0	0	0	0	0	0	0	0	0	0	0	0.0315835	0	0	0	TCGAATTTGGGCTTGAGATTG	21
ptc-miR6477	0	0	0	0	0	0	0	0	0	0	0	0	0	0	0	0.0689339	0	0	TGAACAGTAGACGTGAATTAT	21
ptc-miR6478	19.0927	14.2789	21.9537	20.0152	18.8854	22.6537	24.1029	22.9876	21.2594	25.2809	20.5889	19.4558	13.8515	18.1746	19.7397	18.302	15.0556	15.4111	CCGACCTTAGCTCAGTTGGTG	21
pvu-miR482-5p	0.0336732	0	0.0678631	0	0	0	0	0.0370768	0	0	0	0	0	0	0	0	0.0340624	0.0329298	GGAATGGGCTGATTGGGAAGCA	22
rgl-miR164	0	0	0	0	0	0	0	0	0.0511043	0	0	0	0	0	0	0	0	0	TGGGGAAGAAGAGCACATGAA	21
rgl-miR5137	0	0	0	0	0	0	0	0	0	0	0	0	0	0	0.0315835	0.034467	0	0	AGCGGAGAAGACGATGGGCT	20
rgl-miR5574	0	0	0	0	0	0	0	0	0	0.0329179	0	0	0	0	0	0	0	0	TTTAATCAGAATCTAAAAGCA	21
rgl-miR7797a	0	0	0	0	0	0.0333634	0	0	0	0	0	0	0	0	0	0	0	0	AAGACGGAATCAAACCTCAA	20
rgl-miR7799	0	0	0	0	0	0	0	0	0	0	0	0	0.0338668	0	0	0	0	0	AGTGGAATAGGAGATCTCAA	20
rgl-miR7801	0	0	0	0	0	0	0	0	0	0	0	0	0.0338668	0	0	0	0	0	TACGAGATGAAACACAGTTTG	21
rgl-miR7803b-3p	0	0	0.0339315	0	0	0.0333634	0	0	0	0	0	0	0	0	0	0	0	0	TACACGTGTCAATCATCTAT	20
rgl-miR7808	0	0	0	0.0358695	0	0.10009	0	0	0	0	0	0	0	0	0	0	0	0	AAGGATGCTCGATTCAGAAGAA	22
sbi-miR1432>zma-miR1432-5p	0	0	0	0	0	0.0333634	0	0	0	0	0	0	0	0	0	0	0	0	CTCAGGAGAGATGACACCGAC	21
sbi-miR156e>zma-miR156k-5p	0.336732	0.291406	0.644699	0.251086	0.416589	0.366997	0.421153	0.370768	0.511043	0.691275	0.520797	0.258917	0.237068	0.762357	0.726422	0.379136	0.476873	0.526877	TGACAGAAGAGAGCGAGCAC	20
sbi-miR164c>zma-miR164e-5p	0.0673463	0.0364258	0.0678631	0.107608	0.208294	0.0667267	0	0.0741536	0.0511043	0.131671	0.0694396	0.0739764	0.0338668	0.0914829	0.0631671	0.0689339	0.0340624	0.0329298	TGGAGAAGCAGGACACGTGAG	21
sbi-miR172f	0	0	0.0339315	0	0	0	0	0	0	0.0329179	0	0	0	0	0	0	0	0	AGAATCCTGATGATGCTGCAC	21
sbi-miR396d	0	0	0	0	0	0	0	0	0	0.0329179	0	0	0	0	0	0	0	0	CTCCACAGGCTTTCTTGAACTG	22
sbi-miR396e>zma-miR396c>zma-miR396d	0	0	0	0	0	0	0	0	0	0	0	0	0.0338668	0	0	0	0	0	TTCCACAGGCTTTCTTGAACTG	22
sbi-miR5383	0.0336732	0.0364258	0	0.0358695	0	0.0333634	0	0	0	0	0	0	0	0	0	0	0	0	ATGACAGAGCTCCGGCAGAGATAT	24
sbi-miR5565g-5p	0	0	0.0339315	0	0	0	0	0	0	0	0	0	0.0338668	0	0	0	0	0	TTCACATCAATCCACATATGTTGG	24
sbi-miR5568c-3p	0	0	0	0	0	0	0	0	0	0	0	0	0	0	0	0.034467	0	0	ACTTACAGTTTGGAACGGAGG	21
sbi-miR6231-3p	0	0.0364258	0	0	0	0	0	0	0	0	0	0	0	0	0	0	0	0	TATTTGTGGACTCATGGACAT	21
seu-miR11025	0	0	0	0.0358695	0	0	0	0	0	0	0	0	0	0	0	0	0	0	TGAAGGGCTTTCATGATGGGCA	22
seu-miR11034	0	0	0	0	0	0	0	0	0.102209	0	0	0	0	0	0	0	0	0	TTTTGGATTTGTATGATGCATC	22
seu-miR319	0	0	0	0	0	0	0	0	0.0511043	0	0	0	0	0	0	0	0	0	CGTGAATGATGCGGGAGATAG	21
sly-miR10531	0	0	0	0	0	0	0	0	0	0	0	0	0.0338668	0	0	0	0	0	TGGGGTCCTAGTAGAGTCGGTTC	23
sly-miR156e-5p	0.0336732	0.145703	0.101795	0.179347	0.138863	0.30027	0.161982	0.148307	0.204417	0.0658357	0.104159	0	0.169334	0.21346	0.0631671	0.172335	0.13625	0.263438	TGATAGAAGAGAGTGAGCAC	20
sly-miR166c-5p	0.808156	0.218555	0.746494	0.179347	0.347157	0.333634	0.842306	1.1123	1.07319	0.395014	0.277759	0.332894	0.169334	0.42692	0.347419	1.17188	1.15812	1.02082	GGGATGTTGTCTGGCTCGACA	21
sly-miR167b-5p	0.976522	0.69209	1.59478	0.860867	0.416589	0.433724	1.00429	0.741536	0.766565	0.625439	0.555517	0.40687	0.474136	0.64038	0.694838	1.27528	0.681248	0.724455	TAAAGCTGCCAGCATGATCTGG	22
sly-miR168a-3p	0.168366	0.182129	0.203589	0.107608	0.173579	0.20018	0.518342	0.481998	1.1754	0.559604	0.312478	0.924705	0.338668	0.274449	0.157918	0.379136	0.647185	0.395158	CCTGCCTTGCATCAACTGAAT	21
sly-miR171b-5p	0	0	0	0	0	0	0.0971891	0.0370768	0.0511043	0.0658357	0	0	0	0	0	0	0	0	ATATTGGTGCGGTTCAATTAG	21
sly-miR171d	0.101019	0	0	0	0	0	0	0	0	0	0.104159	0.0369882	0	0	0	0	0.102187	0	TTGAGCCGCGCCAATATCAC	20
sly-miR1918	0	0	0	0.0358695	0	0	0	0	0	0	0	0	0	0	0	0	0	0	TGTTGGTGAGAGTTCGATTCTC	22
sly-miR319c-5p	0	0.0364258	0.0339315	0.107608	0.173579	0.0667267	0.0323964	0	0.0511043	0.0329179	0	0.0369882	0.0338668	0.0304943	0	0	0.0340624	0	AGAGCTTCCTTCAGCCCACTC	21
sly-miR395a>sly-miR395b	0	0.473536	0.508973	0.466303	0.381873	0.30027	2.00857	1.5943	1.02209	1.05337	1.80543	0.517835	2.81095	0.518403	0.505337	0.689339	0.272499	0.0329298	CTGAAGTGTTTGGGGGAACTCC	22
sly-miR397-5p	0.0673463	0	0	0.0717389	0	0	0	0	0	0	0	0	0	0	0	0.103401	0.0340624	0.0329298	ATTGAGTGCAGCGTTGATGA	20
sly-miR398a>stu-miR398a-3p	0.168366	0.0728516	0.135726	0	0.0347157	0.0333634	0.129585	0.259538	0.255522	0	0	0.0369882	0.0338668	0	0.0315835	0.0689339	0.204374	0.164649	TATGTTCTCAGGTCGCCCCTG	21
sly-miR403-3p	0	0	0	0	0	0	0.0323964	0	0	0	0	0	0	0	0	0.034467	0	0	CTAGATTCACGCACAAGCTCG	21
sly-miR403-5p	1.31325	0.546387	1.22154	1.07608	0.798462	1.03426	0.777513	0.556152	0.613252	1.21796	0.902715	0.591811	1.01601	1.03681	0.852756	0.723806	0.306561	0.559806	CGTTTGTGCGTGAATCTAACA	21
sly-miR7981e	0	0	0	0	0	0	0.0323964	0	0	0	0	0	0	0	0	0	0	0	AAGTGTGTCTCTGAGATTTCGGAT	24
sly-miR7981f	0	0	0	0	0	0.0667267	0	0	0	0	0	0	0	0	0	0	0	0	AAGTGTGTCTCTGGAATTTCGGGC	24
sly-miR9473-3p	0	0	0	0	0.0347157	0	0	0	0	0	0	0	0	0	0	0	0	0	AAACGAGTTCAGATTTACAGC	21
sly-miR9476-3p	0	0	0	0	0	0	0	0	0	0.0329179	0	0	0	0.0304943	0	0	0	0	AAAAAGATGCAGGACTAGACC	21
sly-miR9476-5p	0	0	0	0	0	0	0	0	0	0	0	0	0	0.0304943	0.0315835	0	0	0	TCTAGTCCTGCATCTTTTTTT	21
smi-miR12112	3.40099	1.63916	2.64666	2.22391	2.6384	2.83589	7.80752	8.71305	7.56344	2.2055	1.35407	1.62748	1.04987	1.73817	1.86343	4.54964	3.7128	3.4247	CGATCTTGATACCACCAATGG	21
smo-miR1103-5p	0	0	0	0	0	0	0	0	0	0	0	0	0	0	0	0.034467	0	0	AAGAGTGCACCCCCTTTCCAAT	22
smo-miR171a	0	0	0.0678631	0.215217	0	0.0333634	0.129585	0.0370768	0.102209	0.0329179	0.0347198	0.110965	0	0	0	0.172335	0.0681248	0.0329298	TTGAGCCGTGCCAATATCACT	21
smo-miR396	0	0	0.0678631	0.0358695	0.173579	0.10009	0.129585	0.0370768	0	0.0658357	0.0347198	0	0.0677337	0.0609886	0.0315835	0.103401	0	0	TTCCACGGCTTTCTTGAACC	20
smo-miR408	3.53568	2.54981	2.30735	1.97282	0.97204	1.33453	0.971891	16.6846	28.4651	1.77756	1.45823	0.443858	0.609603	1.12829	1.42126	11.4775	28.953	22.8862	TGCACTGCCTCTTCCCTGGCTG	22
sof-miR159e	0.774483	0.69209	0.950083	1.14782	0.763746	0.533814	0.583135	0.481998	0.766565	0.987536	0.590237	0.776752	0.609603	0.518403	0.694838	0.206802	0.57906	0.461017	TTTGGATTGAAAGGAGCTCTT	21
ssl-miR399	0	0.0364258	0.0678631	0	0	0.0667267	0	0	0	0	0	0.0739764	0.135467	0.0304943	0	0.0689339	0	0.0329298	TGCCAAAGGAGAATTGCCCGG	21
ssp-miR1432	0.0673463	0	0.0339315	0.0358695	0.0694315	0	0	0	0.0511043	0	0	0	0	0.0304943	0	0	0	0	CTCAGGAAAGATGACACCGAC	21
stu-miR156f-5p	0.0336732	37.81	0.271452	0.251086	0.208294	0.40036	0	0.556152	34.6998	62.6427	37.5668	26.8165	1.01601	0.548897	0.284252	22.9205	0.204374	0.230509	CTGACAGAAGAGAGTGAGCA	20
stu-miR167c-3p	0	0	0	0	0	0	0	0.0370768	0	0	0	0	0	0	0	0	0	0	GGTCATGCTCGGACAGCCTCACT	23
stu-miR171d-5p	0.0673463	0.0364258	0.0678631	0.0717389	0.104147	0.0333634	0.291567	0.222461	0.408835	0.230425	0.138879	0.0369882	0.0338668	0.121977	0	0.103401	0.204374	0.296368	AGATATTGGTGCGGTTCAATT	21
stu-miR172c-3p	0	0.0364258	2.98598	0	0	0.0333634	0	0.0370768	0	2.23841	0	0	0	0	0.315835	0	0	0.329298	AGAATCTTGATGATGCTGC	19
stu-miR319-3p	0	0	0	0	0	0	0	0	0	0.0658357	0	0	0	0	0	0	0	0	TTGGACTGAAGGGTTCCCTTC	21
stu-miR319a-5p	0	0	0	0.0717389	0	0	0	0	0	0	0	0	0	0	0	0	0	0	AGAGCTTTCTTCGGTCCACAC	21
stu-miR396-3p	0	0	0	0	0	0	0	0.0370768	0	0	0.0347198	0	0	0	0	0	0	0	GTCCAAGAAAGCTGTGGGAAA	21
stu-miR397-5p	0.63979	0.182129	0.508973	0.179347	0	0.0667267	3.82277	2.00215	2.45301	0.230425	0.138879	0.184941	0.0677337	0.396426	0.157918	1.41315	1.3625	1.38305	ATTGAGTGCAGCGTTGATGAC	21
stu-miR408a-3p	0	0	0	0	0	0	0	0	0	0	0	0.0369882	0	0	0	0	0	0	TGCACAGCCTCTTCCCTGGTT	21
stu-miR477a-3p	0	0	0	0	0	0	0	0	0	0	0	0	0.0338668	0	0	0	0	0	GAAGCTCTAGCAGGGAGAGCCA	22
stu-miR477a-5p	0	0	0	0	0	0	0.0323964	0	0	0	0.0347198	0	0.135467	0	0	0	0	0	CCTCTCCCTCAAGGGCTTCTC	21
stu-miR8005a>stu-miR8005b-3p>stu-miR8005c	0	0	0.0339315	0.0358695	0	0.0333634	0	0	0	0.0658357	0	0	0.0338668	0	0	0	0.0340624	0.0329298	TTTAGAGTTTAAGGTTTAGAGTTT	24
stu-miR8019-5p	0.0673463	0	0	0	0	0	0	0	0	0	0	0	0	0	0	0	0	0	AGGGAAGCAGGTCATTCTTTATG	23
stu-miR8049-5p	0	0	0	0	0	0	0	0	0	0	0	0	0	0	0.0315835	0	0	0	CAAGGCTCATGCAGACATGCA	21
stu-miR8051-5p	0	0.0364258	0	0	0.0694315	0.0333634	0	0	0	0	0	0	0.0338668	0	0.0315835	0	0	0	TAGTATGGTAGAAAGATTCA	20
tae-miR10518	0	0	0	0	0	0	0	0	0.0511043	0	0	0	0	0	0	0	0	0	AAGAGATTTTGAAGGGAT	18
tae-miR1118	0	0	0	0.0358695	0	0	0	0	0	0	0.0347198	0	0	0	0	0	0	0	CACTACATTATGGAATGGAGGGA	23
tae-miR1120a	0	0	0	0	0	0	0	0	0	0.0329179	0	0	0.0338668	0	0	0	0	0	ACATTCTTATATTATGAGACGGAG	24
tae-miR1120b-3p	0	0	0	0	0	0	0	0	0	0	0	0	0	0.0609886	0	0	0	0	TTCTTATATTGTGGGACAGAG	21
tae-miR1122c-3p	0	0	0	0	0.0347157	0.0333634	0	0	0	0	0.0347198	0	0	0	0	0	0	0	TCTAATATTATGGGACGGAGG	21
tae-miR1127b-3p	0.0336732	0	0	0	0	0	0	0	0	0	0	0	0	0	0	0	0	0	ACAAGTATTTCTGGACGGAGG	21
tae-miR1128	0.370405	0.182129	0	0.107608	0	0	0.0323964	0.0370768	0.0511043	0	0.138879	0.0369882	0	0	0.0947506	0.310203	0.0340624	0.0658596	TACTACTCCCTCCGTCCGAAA	21
tae-miR1133	0.538771	0.364258	0.169658	0.538042	0.347157	0.433724	0.129585	0.370768	0.0511043	0.131671	0.173599	0.40687	0.541869	0.152471	0.53692	0.379136	0.170312	0.0658596	CATATACTCCCTCCGTCCGAAA	22
tae-miR1135	0	0	0	0	0	0	0	0	0	0	0	0	0	0	0	0	0	0.0329298	CTGCGACAAGTAATTCCGAACGGA	24
tae-miR167b	0.101019	0.109277	0.0678631	0.0717389	0.138863	0	0	0.11123	0.0511043	0	0	0.0739764	0	0	0	0	0.0340624	0	TGAAGCTGACAGCATGATCTA	21
tae-miR399	0.0336732	0	0	0	0	0.20018	0	0	0	0	0	0	0	0	0	0	0.0340624	0	TGCCAAAGGAGAATTGCCC	19
tae-miR5049-3p	0	0	0	0	0	0	0	0	0.0511043	0	0	0	0	0	0.0315835	0	0	0	AATATGGATCGGAGGGAGTAC	21
tae-miR5086	0	0	0	0	0	0.0333634	0	0	0	0	0	0	0	0	0	0	0	0	ACATTGGTGGAAGGCGTGGTA	21
tae-miR7757-5p	0	0	0	0	0	0	0	0	0.0511043	0	0	0	0	0	0	0	0	0.0329298	ATAAAACCTTCAGCTATCCATC	22
tae-miR9674a-5p	0	0	0.0339315	0	0	0	0	0	0	0	0	0	0	0	0	0	0	0	GCATCATCCATCCTACCATTC	21
tae-miR9780	0	0	0	0	0	0	0	0	0	0	0	0	0.0677337	0.0304943	0.0631671	0	0	0	CGGGTCGGCGCTGCACGCGGC	21
tcc-miR172d	0	0	0.101795	0	0	0	0	0.0370768	0	0.0329179	0	0	0.0677337	0.0304943	0.0631671	0	0.0340624	0	AGAATCCTGATGATGCTGCAT	21
tcc-miR530a	0	0	0	0	0	0	0	0	0	0	0	0	0	0.0304943	0	0	0	0	TGCATTTGCACCTGCACCTC	20
vca-miR10206b-5p	0	0	0	0	0	0	0	0	0	0	0.0347198	0	0	0	0	0	0	0	AGACAGATCAGGTACATTGAATCT	24
vca-miR159-5p	0	0	0	0	0	0.0333634	0	0	0.102209	0	0	0	0	0	0	0	0	0	GAGCTTCCTTGGGTCCAAAGA	21
vca-miR166a-5p	0	0.0364258	0	0	0	0.0333634	0	0	0	0	0	0.0369882	0	0	0.0315835	0	0	0	GGAATGTTGTCTGGTTCGAAA	21
vca-miR166c-5p	0.707136	0.619239	0.644699	0.322825	0.347157	0.733994	0.647927	0.704459	0.562148	0.559604	0.520797	0.295906	0.338668	0.396426	0.252668	0.758273	1.29437	0.823245	GGAATGTTGTCCGGCTCGAGG	21
vca-miR168b-3p	0.875502	0.655665	0.712562	0.538042	0.659599	0.567177	1.97618	1.96507	1.73755	1.4813	1.49295	1.8864	0.203201	0.335437	0.44217	1.24081	1.70312	1.64649	CCCGCCTTGCACCAACTGAAT	21
vca-miR396-5p>vvi-miR396b	76.5391	0.291406	36.7479	0	0.451304	0	0.0323964	0	21.055	79.6612	1.35407	83.2605	0	33.3912	31.5204	0.103401	10.0484	40.0426	TTCCACAGCTTTCTTGAACT	20
vvi-miR156e	0.74081	0.43711	0.712562	0.753259	0.381873	0.533814	1.10148	0.185384	0.35773	0.625439	0.451358	0.443858	0.609603	0.457414	0.758005	0.585938	0.544998	0.197579	TGACAGAGGAGAGTGAGCAC	20
vvi-miR156h	0.101019	0	0.0339315	0.0358695	0	0	0.0323964	0.11123	0	0.0658357	0	0	0.0338668	0.0304943	0.0631671	0.103401	0	0.0329298	TGACAGAAGAGAGAGAGCAT	20
vvi-miR159a>vvi-miR159b	0	0.0364258	0.0339315	0	0	0	0	0	0	0.0329179	0	0	0	0	0	0	0	0	CTTGGAGTGAAGGGAGCTCTC	21
vvi-miR171g	0	0	0.101795	0	0	0.0333634	0	0.148307	0	0.0329179	0.0694396	0	0	0	0.0631671	0	0.0340624	0	TTGAGCCGAACCAATATCACC	21
vvi-miR171h	0	0.0364258	0	0.107608	0.0694315	0	0	0.0370768	0	0	0	0	0	0	0.0315835	0	0	0	TGGTTGAGCCGCGCCAATATC	21
vvi-miR172a	0	0	0	0	0	0.0333634	0	0	0	0	0	0	0	0.0304943	0	0	0	0	TGAATCTTGATGATGCTACAT	21
vvi-miR172b	0	0	0	0	0.0347157	0	0	0.0370768	0	0.0658357	0	0.0369882	0	0	0	0	0	0	TGAATCTTGATGATGCTACAC	21
vvi-miR2111-5p	0.0336732	0	0.0678631	0	0.0347157	0	0.0647927	0	0	0	0	0.0369882	0	0	0	0.137868	0.0340624	0	TAATCTGCATCCTGAGGTCTA	21
vvi-miR3623-3p	0	0	0.0339315	0	0	0	0	0.11123	0.0511043	0	0	0	0	0	0	0	0	0	TGGTGCTTGGACGAATTTGCTA	22
vvi-miR3623-5p	0	0	0	0	0	0	0.0323964	0	0	0	0	0.0369882	0	0.0914829	0	0	0	0	TCACAAGTTCATCCAAGCACCA	22
vvi-miR3630-3p	1.31325	0.619239	0.916152	0.68152	0.902609	1.0009	1.19867	1.48307	0.970982	0.888782	1.00687	0.850729	0.846671	1.03681	0.568504	1.37868	1.05593	0.823245	TTTGGGAATCTCTCTGATGCAC	22
vvi-miR399g	0	0	0	0	0	0	0	0	0	0	0	0.0739764	0	0	0.0315835	0	0	0	TGCCAAAGGAGATTTGCCCCT	21
vvi-miR479	0	0	0	0	0	0	0.0323964	0	0	0	0	0	0	0	0	0	0	0	TGTGGTATTGGTTCGGCTCATC	22
vvi-miR845c	0	0	0	0	0	0	0	0	0	0	0.0347198	0	0	0.0609886	0	0	0	0	AGGCTCTGATACCAATTGATG	21
zma-miR156a-3p	2.22243	3.02334	1.49299	2.65434	4.79077	7.70694	3.14245	8.1569	6.13252	4.83893	5.55517	3.25496	3.35282	3.7203	4.13744	4.2739	1.60093	4.28087	GCTCACTTCTCTCTCTGTCAGT	22
zma-miR156e-3p	0.0336732	0	0	0	0	0	0	0	0.0511043	0.0329179	0	0	0	0	0	0	0	0	GCTCACTGCTCTCTCTGTCATC	22
zma-miR159b-5p>zma-miR159j-5p>zma-miR159k-5p	0.0336732	0	0	0	0	0	0	0	0	0	0	0.0369882	0	0	0	0	0	0	GTGCTCCCTTCAAACCAATAA	21
zma-miR159c-5p>zma-miR159d-5p	0.269385	0.0728516	0.169658	0.0358695	0	0.0333634	0	0.0370768	0	0.296261	0.104159	0.0369882	0.0677337	0	0.0315835	0	0	0	GAGCTCCCTTCGATCCAATCC	21
zma-miR159e-3p	0.0673463	0.109277	0.0678631	0	0	0	0	0	0	0.0658357	0	0	0	0	0.0315835	0	0	0.0329298	ATTGGTTTGAAGGGAGCTCCA	21
zma-miR159g-3p	0	0.0364258	0.0339315	0.107608	0	0.0667267	0	0	0	0.0658357	0.0347198	0.0369882	0	0.0304943	0	0	0.0340624	0	TTTGGAGTGAAGGGAGTTCTG	21
zma-miR159h-3p>zma-miR159i-3p	0.269385	0.218555	0.135726	0.107608	0.208294	0.266907	0.259171	0.11123	0.0511043	0.296261	0.0694396	0.110965	0.0338668	0.152471	0.221085	0.0689339	0.0681248	0.0658596	TTTGGAGTGAAGGGAGCTCTG	21
zma-miR160a-3p	0	0	0	0	0	0	0	0	0	0	0	0	0	0	0	0	0.0340624	0	GCGTGCAAGGGGCCAAGCATG	21
zma-miR164a-3p	0	0	0	0	0	0.0333634	0	0	0	0	0	0	0	0	0	0	0	0	CACGTGTTCTCCTTCTCCATC	21
zma-miR164g-3p	0.0336732	0.145703	0.0339315	0.0717389	0.104147	0.10009	0.0323964	0.0370768	0.102209	0	0.104159	0	0.0677337	0.0609886	0	0	0	0.0987894	CACGTGCTCCCCTTCTCCACC	21
zma-miR164h-5p	102.366	120.059	83.6413	160.337	191.7	201.315	60.7432	101.479	62.8072	185.393	185.369	165.411	89.1375	95.2642	86.2863	31.0203	35.0161	27.3976	TGGAGAAGCAGGGCACGTGTG	21
zma-miR166k-5p	0.0336732	0	0	0	0	0	0	0	0	0	0	0	0	0	0	0	0.0340624	0	GGATTGTTGTCTGGCTCGGGG	21
zma-miR166n-5p	0	0	0	0	0	0	0.0323964	0	0	0	0	0	0	0	0	0	0	0	GGATTGTTGTCTGGCTCGGTG	21
zma-miR167f-3p	0.0336732	0	0	0	0	0	0	0	0	0	0	0	0	0	0	0	0	0	GATCGTGCTGCGCAGTTTCACC	22
zma-miR168b-3p	0.0336732	0	0	0.107608	0	0	0.0647927	0	0	0.0329179	0	0	0.101601	0	0	0	0	0	CCCGCCTTGCATCAAGTGAA	20
zma-miR169c-3p	0.0336732	0	0	0	0	0	0	0	0	0	0	0	0	0	0	0	0	0	GGCAAGTCTGTCCTTGGCTACA	22
zma-miR171a-3p	0.0336732	0	0	0	0.0347157	0	0	0	0	0.0329179	0.0347198	0	0	0	0	0	0	0	TGATTGAGCCGCGCCAATAT	20
zma-miR171c-3p	0	0.0364258	0	0	0	0	0	0	0	0	0	0	0	0	0	0	0	0	TGACTGAGCCGTGCCAATATC	21
zma-miR171c-5p	0	0	0	0	0	0	0	0	0	0	0	0	0	0	0	0.0689339	0	0	TATTGGTGCGGTTCAATCAGA	21
zma-miR172d-5p>zma-miR172b-5p	0	0	0	0.0358695	0	0	0	0	0	0	0	0	0	0	0	0	0	0	CAGCACCATCAAGATTCACA	20
zma-miR2118f	0	0	0	0	0	0.0333634	0	0	0	0	0	0	0	0	0	0	0	0	TTCCCAATGCCTTCCATGCCTA	22
zma-miR319a-5p>zma-miR319c-5p	0.0336732	0	0	0	0	0	0	0	0	0	0	0	0	0	0	0	0	0	GAGCTCTCTTCAGTCCACTC	20
zma-miR395c-5p	0	0	0	0	0	0	0.0323964	0	0	0	0.0694396	0	0	0	0.0315835	0	0	0	GTTCCCTGCAAACACTTCACCA	22
zma-miR395l-5p	0.0336732	0	0.0339315	0	0.0347157	0	0.0647927	0	0	0	0	0	0	0.0304943	0	0	0	0	GTTCCTTCCAAACACTTCACCA	22
zma-miR396g-3p	0.0336732	0	0.0678631	0.0358695	0.138863	0.0667267	0.0971891	0.11123	0	0.0658357	0.0694396	0	0	0	0.0315835	0.0689339	0.0681248	0.0329298	GTTCAAGAAAGCTGTGGAAGA	21
zma-miR397a-5p>zma-miR397b-5p	0	0	0	0	0	0	0.0323964	0.0741536	0.102209	0	0	0	0	0	0	0.034467	0	0	TCATTGAGCGCAGCGTTGATG	21
zma-miR398b-5p	0	0.0364258	0	0	0	0.0333634	0	0.0370768	0	0	0.0347198	0	0.0677337	0.0304943	0	0	0.0340624	0.0329298	GGGGCGGACTGGGAACACATG	21
zma-miR827-5p	0	0	0	0	0.0347157	0.0667267	0	0	0	0	0	0	0	0	0	0.034467	0	0	TTTGTTGGTGGTCATTTAACC	21
novel1_mature	1.751	2.14912	2.40914	1.2913	0.97204	1.30117	1.03668	0.963997	0.970982	1.25088	0.763836	0.776752	1.28694	1.31125	1.16859	1.41315	0.885622	1.08668	GATAGATTGACAGTGGACGGAGGG	24
novel1_star	0.0336732	0	0	0	0	0	0	0	0	0	0	0	0	0	0	0	0	0	ATTTGTCTTAGTGGAGGGTGT	21
novel10_star>novel11_star	6.26321	6.19239	9.19545	5.55977	5.65866	6.87285	8.9414	8.71305	7.51233	8.03196	7.60364	9.91284	6.80723	7.77604	6.15879	13.7523	14.0678	13.1719	GGTTAGGGCTTCGTTGGTAAGG	22
novel100_mature	0.134693	0.109277	0.0339315	0.0358695	0.0694315	0.133453	0.0323964	0.222461	0.153313	0.0658357	0.0694396	0.0739764	0.203201	0.182966	0.0947506	0.034467	0	0.0329298	CTCTATGTCGGCGTGCCGGT	20
novel101_mature	0	0	0	0.0358695	0	0.0333634	0	0	0.0511043	0	0	0	0.0677337	0	0.0315835	0.034467	0.0340624	0.0329298	AGGAAGCTCTGGTGGAGGA	19
novel102_mature	0.168366	0	0.135726	0.0717389	0.138863	0.166817	0.0971891	0.0370768	0	0.230425	0.138879	0	0.0338668	0.152471	0.0631671	0	0	0	CTTCGTCACTTCGATTCGA	19
novel103_mature	0.538771	0.728516	1.2894	1.32717	0.798462	0.967538	1.32825	0.370768	0.766565	1.11921	0.659677	0.591811	0.914405	1.21977	1.23176	0.379136	0.408749	0.526877	AGGAGTGTTTGGTTCATATTGAGT	24
novel104_mature	0.0673463	0.0364258	0	0.0358695	0.0347157	0.0333634	0.0323964	0.0370768	0.102209	0.0658357	0.104159	0.147953	0.101601	0.0304943	0.0631671	0.0689339	0.102187	0.0658596	TTAAGCAACGAGCCTTTGGAT	21
novel105_mature	0.0673463	0	0.101795	0.0358695	0.0347157	0.0667267	0.129585	0	0.102209	0.0658357	0.138879	0	0.0338668	0.0304943	0	0.275736	0.0681248	0.164649	TGACAAGTCGAGCAGATG	18
novel106_mature	0.101019	0.0728516	0.339315	0	0.277726	0.166817	0.194378	1.03815	0.664356	0.131671	0.486077	0	0.135467	0.0609886	0	0.379136	0.0340624	1.11961	GTTGGGCGTGGTCGGAAAGT	20
novel107_mature	0.942849	0.874219	0.780426	1.04021	0.624883	0.533814	1.26346	1.14938	0.562148	0.888782	0.937435	0.554823	0.541869	0.823346	0.631671	0.482537	0.340624	0.131719	TGACGGAGATGATGAAGGCGT	21
novel108_mature	0	0	0	0	0	0	0.129585	0.148307	0.102209	0	0.0347198	0	0	0.152471	0.0947506	0.034467	0.0340624	0.0658596	CAGGATGATGGTAGCGCCG	19
novel109_mature	0.202039	0	0.407179	0.0358695	0.138863	0.266907	0.161982	0.11123	0.102209	0.230425	0.173599	0.0369882	0.0677337	0.243954	0.315835	0.172335	0.13625	0.164649	CTCAACTGGCAGAGCAGC	18
novel110_mature	37.7813	0.801368	49.8794	48.6749	30.654	29.3931	1.06908	30.1434	38.7882	3.85139	40.9694	2.07134	2.20134	36.7151	1.67393	30.4343	23.6052	1.2184	TTGAGGTACAATAACTTGGGTTGC	24
novel111_mature	0	0	0	0	0.0347157	0	0.161982	0.0370768	0	0	0.0347198	0.0739764	0	0	0.0631671	0.0689339	0.0681248	0.0658596	GATTGTAGAGGGCTTTGTA	19
novel112_mature	0.202039	0.109277	0	0.179347	0.0694315	0.133453	0.129585	0.0741536	0.204417	0.131671	0.138879	0.0369882	0.169334	0.0609886	0.0947506	0.103401	0.0340624	0	TGCCTGGCTCCCTGTATACA	20
novel113_mature	0.235712	0.218555	0.44111	0.466303	0.347157	0.30027	0.323964	0.259538	0.0511043	0.526686	0.243039	0.295906	0.270935	0.21346	0.410586	0.241269	0.102187	0.0987894	TCACAAGTTAGATGGGTCTTTT	22
novel117_mature	0.370405	0.582813	0.101795	0.430434	0.416589	0.266907	0.291567	0.222461	0.102209	0.263343	0.277759	0.221929	0.440269	0.304943	0.44217	0.034467	0.0340624	0.0658596	ACCCATGATGAGATTTTTCTGAAG	24
novel118_mature	0.0336732	0	0.0339315	0	0	0	0.0647927	0.11123	0	0	0.104159	0.0369882	0	0.0914829	0	0	0.13625	0.0658596	AGGTTCGAGTCCTCTCCT	18
novel13_star>novel14_star	7.7785	7.72227	7.70246	2.97717	3.92288	4.53742	47.1691	63.3643	44.1541	4.90476	4.27054	4.6975	3.45442	3.07992	3.12677	42.1875	51.9111	46.6944	GGGATGTTGGCTGGCTCGATG	21
novel15_mature	2.55916	1.96699	2.64666	0.538042	0.97204	1.20108	9.10338	10.5298	8.48332	1.25088	1.42351	0.998682	0.575736	0.975817	1.07384	11.443	10.7637	11.0644	GGGATGTTGTCTGGCTCGATG	21
novel16_mature	45.7618	43.5288	58.1247	26.2565	20.2046	29.8602	44.4478	37.0027	42.4677	52.2736	38.9556	24.4122	25.7049	37.7519	33.3206	34.8461	36.3105	42.8746	TTGACAGAAGAGAGCGAGCAC	21
novel16_star	0.707136	1.05635	0.780426	0.573912	0.555452	0.767357	1.55503	1.33476	0.970982	1.74465	1.11103	1.40555	0.778937	1.37224	0.852756	1.34421	1.63499	1.31719	GCTCTCTTCCTTCTGTCAGCT	21
novel17_mature	1.04387	20.1435	0.984015	0.860867	1.28448	1.06763	42.99	1.07523	0.664356	60.0093	1.31935	29.3686	34.9844	1.73817	39.9532	1.51655	0.476873	24.4668	TTGAGGTACAATAACTTGGGT	21
novel17_star	0.0673463	0	0	0.215217	0.138863	0.0333634	0.291567	0.222461	0.562148	0.329179	0.381918	0.332894	0	0.152471	0.157918	0.137868	0.13625	0.230509	CTGAGTTATTGTACCTTAAAT	21
novel18_mature	0.303058	0.145703	0.237521	0.179347	0.24301	0.0333634	0.453549	0.333691	0.204417	0.0329179	0.312478	0.0369882	0.135467	0.0609886	0.189501	0.241269	0.442811	0.526877	AGAGGTGGCAGAGTGGTTGAAT	22
novel19_mature	47.5465	41.1612	45.8754	28.1934	33.466	38.9017	35.96	39.3014	31.4292	44.0112	36.8724	39.4294	27.3305	29.2745	27.0039	30.9169	38.7971	33.786	TCTCTGCTCGCTGGATCTGGA	21
novel19_star	0.235712	0.109277	0.0678631	0.322825	0.24301	0.133453	0.388756	0.148307	0.306626	0.427932	0.416638	0.221929	0.0677337	0.335437	0.252668	0.137868	0.306561	0.592736	CAGATCCAACGTGTCGAAAAC	21
novel2_mature	183.855	52.6717	194.53	10.2228	188.888	211.791	38.1305	221.089	138.39	168.079	155.267	66.4678	120.024	118.531	83.4437	98.1963	113.632	12.0194	TTACCAATGCCGCCCATACCGAT	23
novel2_star>novel3_star	9.32747	8.26866	8.41502	5.12933	6.42241	7.70694	14.4812	19.0204	16.2512	10.3362	10.9367	15.572	7.1459	7.56258	8.02222	33.5708	31.5758	31.4809	GGTTAGGGCGTCGTTGGTAAGG	22
novel20_mature	8.75502	5.5003	9.29724	5.77498	4.54776	5.47159	6.86803	5.48737	4.95712	7.11026	5.20797	4.95642	5.65576	5.3365	5.68504	5.89385	5.27967	5.00533	AGCGGAGTAGAGGAATGG	18
novel21_mature>novel22_mature>novel23_mature	8.58666	6.08311	13.1315	6.27716	6.94315	8.67448	5.53978	5.33906	6.23473	11.7517	11.1798	8.21138	3.82695	8.75186	7.95905	3.51563	4.01936	3.4247	TCTCTCTTCCTTAAAGGTTTC	21
novel21_star>novel22_star>novel23_star	9.42849	6.81163	5.93802	3.47934	3.47157	4.33724	2.94807	7.48951	4.7016	4.31224	4.13166	5.14136	2.94641	2.37855	2.6846	7.41039	6.02904	6.71768	AGCCTTTAGGGGGGAGAGAAC	21
novel24_mature	19.0253	10.3449	21.9537	22.4543	14.0599	13.7791	53.3244	26.7695	40.9857	50.891	29.616	20.1586	16.9334	20.6141	23.5929	41.6016	49.0839	50.4155	CATGGTGTGAAGTAGAGTACT	21
novel24_star	0.101019	0.109277	0	0.0358695	0	0	0	0	0	0.0329179	0	0	0	0	0	0	0	0	TAGCTCTAGCCCTCAAACTCC	21
novel25_mature	2.82855	1.89414	2.5788	4.55542	2.36067	2.06853	1.65221	0.407845	1.32871	3.25887	1.45823	0.887717	3.01415	2.62251	3.15835	0.999542	1.09	0.691526	CTTGGTGATGAAGTTTATTCTGAGA	25
novel26_mature	1.34693	0.655665	0.916152	0.789128	0.659599	0.700631	0.291567	0.556152	0.408835	0.625439	0.694396	0.517835	0.440269	1.21977	0.379003	0.379136	0.647185	0.592736	GTGGTACATAGATAGTGGGTGC	22
novel27_mature	3.03058	1.20205	2.85025	3.29999	2.77726	2.46889	0.421153	0.593229	0.970982	4.93768	4.09694	3.99473	1.28694	1.67719	1.9266	0.241269	0.0681248	0.0658596	ATCCAACGATGCAGGAGCTGT	21
novel27_star>novel68_star	0.0673463	0.145703	0.101795	0.322825	0.416589	0.30027	0	0	0	0.197507	0.381918	0.295906	0.0338668	0.0304943	0.221085	0.034467	0.0340624	0.0329298	AGCTGCTGACTCGTCGGTTCG	21
novel28_star>novel76_mature>novel116_mature	4.71424	3.31475	2.71452	3.65869	1.73579	1.46799	3.30443	3.26276	2.75963	3.81847	5.69405	2.10833	1.35467	3.04943	1.35809	4.20497	4.01936	4.70896	TGGAGAAGCAGGGCATGTGCA	21
novel29_mature	0.202039	2.54981	2.74846	0.0717389	1.83993	2.53562	2.62411	3.15153	2.91295	3.25887	0.208319	2.5152	1.21921	0.0609886	1.16859	3.10203	3.4403	2.93075	TGGAGAAGCAGGGCATGTGC	20
novel3_mature>novel10_mature>novel11_mature	42.1251	150.584	12.2154	129.274	2.32595	0.0667267	129.715	4.07845	8.02338	46.48	18.0196	144.254	8.36511	9.6362	26.4038	33.5363	11.3428	108.405	TTACCAATGCCGCCCATACCGA	22
novel30_mature	0	0	0.271452	0	0.138863	0	0	0.481998	0.255522	0	0	0	0	0.152471	0.0947506	0.206802	0.102187	0.362228	CATGTTCTCAGGTCGCCCCT	20
novel30_star>novel31_star	0.841829	0.400684	1.01795	0.286956	0.208294	0.166817	2.88328	1.89092	1.48203	0.296261	0.0694396	0.184941	0.508003	0.182966	0.473753	5.27344	5.38186	5.92736	GGGGTAACATGAGAACATATA	21
novel31_mature	5.58975	4.5168	5.80229	2.83369	4.79077	5.97204	23.6817	27.2515	21.9238	3.98306	3.5067	4.17967	3.08188	4.11673	4.73753	20.8525	27.0115	22.8862	CATGTTCTCAGGTCGCCCCTG	21
novel32_mature	0.370405	0.69209	1.01795	0.68152	0.347157	0.433724	2.33254	1.5943	1.68644	2.04091	1.45823	0.998682	0.846671	1.03681	1.26334	1.68888	2.86124	2.86489	GAGAAATTGAGTGCAGTACTGG	22
novel32_star	0.168366	0.182129	0.101795	0.143478	0.104147	0.0333634	0.485945	0.222461	0.306626	0.131671	0.104159	0.147953	0.169334	0.182966	0.189501	0.34467	0.408749	0.296368	CAGTACTGCATTCAATTGTTCC	22
novel33_mature	0.63979	0.109277	0.271452	0.538042	0.208294	0.266907	0.161982	0.259538	0.35773	0.493768	0.312478	0.332894	0.541869	0.42692	0.473753	0.654872	0.170312	0.0987894	AGGGATATTGACTGTAGCAGC	21
novel33_star	0.0336732	0	0.101795	0	0.0347157	0.0667267	0.0971891	0	0.0511043	0	0	0.110965	0.0338668	0	0	0.034467	0	0	TGCACACAAATAAATCCCCA	20
novel34_mature	0.202039	0.291406	0.339315	0.466303	0.312442	0.467087	0.388756	0.259538	0.408835	0.46085	0.0694396	0.110965	0.372535	0.304943	0.473753	0.34467	0.272499	0.428087	GATAAAGACTTGCATGCACTCGAG	24
novel34_star	0	0	0	0	0.0347157	0	0	0	0	0	0	0	0	0	0	0	0	0	GAGGAAAAGAAGGGAAGTCGT	21
novel36_mature	6.63361	3.13262	3.93606	2.79782	1.90936	2.26871	3.69319	3.29984	3.06626	4.0489	3.29838	3.47689	2.57388	2.43954	1.76868	5.48025	3.7128	4.80775	CAAGATAGAACACACCACTGG	21
novel36_star>novel64_mature>novel65_mature	0.437751	0.254981	0.916152	0.251086	0	0.233544	1.03668	0.444922	0.664356	0.230425	0.416638	0.147953	0.237068	0.121977	0.221085	0.861674	0.953747	0.724455	AGTGGTGTGTTCTATCTGGTG	21
novel37_mature	1.3806	1.31133	3.2235	2.29565	1.04147	1.40126	2.91567	1.85384	2.50411	2.92969	1.59711	1.36856	1.89654	2.98844	1.89501	1.65441	1.22625	1.94286	CCTTCTGTTTCTGTGCTTGAGA	22
novel37_star	0	0	0	0	0	0	0	0.0370768	0	0	0	0	0	0	0	0	0	0	CAATCGTCAGGATCAAGGTCGT	22
novel38_mature	3.29997	3.35117	4.17358	2.86956	2.88141	3.20288	1.7494	1.26061	1.94196	2.30425	1.77071	3.03303	2.06588	2.59201	2.3056	1.82675	2.24812	1.44891	CAGCGGTCAAGTTCCTCCTTC	21
novel38_star	0	0	0	0	0	0	0	0	0	0	0	0	0	0	0	0.034467	0	0	TGGGATGACTTGTTCACGCTG	21
novel39_mature	0.437751	0.400684	0.305384	0.573912	0.277726	0.467087	0.194378	0.148307	0.255522	0.230425	0.277759	0.295906	0.237068	0.396426	0.157918	0.103401	0.0340624	0.0329298	GGCGAACTGCTCGAGCAC	18
novel4_mature>novel6_mature	198.739	210.723	243.323	122.925	215.932	229.006	221.462	310.444	205.848	207.251	202.555	238.537	121.277	142.134	115.564	160.168	189.727	162.607	TTTCCGATACCGCCCATGCCGA	22
novel4_star>novel6_star	13.3346	15.6631	15.9478	8.21411	12.2199	12.945	24.524	30.4401	21.8726	22.4171	22.3943	24.3013	10.5326	13.9969	15.8865	25.9881	38.8992	35.0373	GGTTGGGCGTGGTCGGAAAGT	21
novel40_mature	0.0336732	0.0364258	0.169658	0.0717389	0.0347157	0.0333634	0.0323964	0.222461	0	0.0987536	0.0694396	0.0369882	0.0338668	0.0914829	0.0947506	0.034467	0.102187	0.0987894	GCTCGTAGTTGGATCTCG	18
novel41_mature>novel42_mature>novel43_mature	1.95304	1.85772	1.49299	0.824998	1.42334	1.0009	8.45545	11.568	9.65872	0.757111	0.520797	0.591811	1.62561	1.43323	1.54759	19.0947	20.3352	22.2276	GGTTCGCGGACGAGCTGAAGTTGT	24
novel41_star>novel42_star>novel43_star	0.0336732	0	0	0.0358695	0	0	0.0647927	0.222461	0.0511043	0	0	0	0	0	0	0.034467	0.0340624	0.0329298	TGCTTCAGCTGGTTCGCGTACGT	23
novel44_mature	0.572444	0.473536	1.05188	1.07608	0.451304	0.667267	0.550738	0.0741536	0.255522	0.625439	0.937435	0.221929	0.372535	0.731863	0.694838	0.275736	0.272499	0.263438	TCTGCAGTTGGTTCCTTGATGT	22
novel45_mature	0.168366	0.109277	0.203589	0.215217	0.208294	0.233544	0.226775	0.333691	0.204417	0.296261	0.138879	0.147953	0.135467	0.121977	0.126334	0.241269	0.204374	0.395158	AGGATATGAACTCTCCGGAA	20
novel45_star	0	0	0	0	0	0.0333634	0	0	0	0	0	0	0	0	0	0	0	0	TGGTGAGTAAAGTGGGGCTCAATT	24
novel46_mature	0.707136	0.509961	0.339315	0.609781	0.208294	0.333634	0.226775	0.296614	0.255522	0.296261	0.173599	0.110965	0.237068	0.365931	0.0631671	0.34467	0.0340624	0.197579	GCTGGGATGCAAGAAACACGG	21
novel47_mature>novel48_mature>novel72_mature	0.437751	0.364258	0.135726	0.322825	0.24301	0.433724	0.0971891	0.0741536	0.102209	0.559604	0.347198	0.147953	1.01601	0.518403	0.473753	0.137868	0.0681248	0.164649	AAGGAAATTCGAGAAAAGGGT	21
novel47_star	0	0	0	0.0358695	0	0	0	0	0	0	0	0	0	0	0	0	0	0	CCCTTTTCTCAATTTTCTTC	20
novel49_mature	0.168366	0.145703	0.373247	0.251086	0.451304	0.20018	0.291567	0.0741536	0.102209	0.625439	0.173599	0.258917	0.169334	0.365931	0.505337	0.0689339	0.13625	0	TTTGCATCCAAATTGTCCGAGC	22
novel49_star	0.0336732	0	0.169658	0.215217	0.24301	0.0333634	0.0647927	0.0370768	0	0.131671	0.104159	0.110965	0.169334	0.21346	0.284252	0.034467	0.0681248	0	CTTGTCTGACATTTTGTGTGGT	22
novel5_mature	7.87952	6.9209	11.7064	33.3586	17.7745	15.7475	23.3578	8.7872	14.718	13.4963	8.2286	5.17835	30.7172	26.8045	26.4354	2.13695	1.49874	2.14044	TATTTCTGAAGGTTCTGTGATGATA	25
novel5_star	0.202039	0.400684	0.339315	0.860867	0.48602	0.600541	0.161982	0.481998	0.102209	0.230425	0.624957	0.554823	0.711204	0.64038	0.726422	0.103401	0.0681248	0.0987894	AAATCTGAGAACCTGATG	18
novel50_mature	0.101019	0.145703	0	0	0.0694315	0.0667267	0.0647927	0.0741536	0.0511043	0	0.0694396	0	0.101601	0.0914829	0	0	0	0.0329298	GAGGAGGTAAATTGTAGAATG	21
novel51_mature	0.572444	0.327832	0.610768	0.68152	0.347157	0.166817	0.777513	0.259538	0.71546	0.691275	0.277759	0.295906	0.440269	0.335437	0.505337	0.206802	0.306561	0.263438	GTGATGTGACCTGACGATTAATCT	24
novel51_star	0.0336732	0.109277	0.0339315	0.286956	0.104147	0	0.291567	0.0741536	0.0511043	0.131671	0.104159	0.184941	0.270935	0.152471	0.189501	0.103401	0.102187	0.0329298	TGACGTCAGTTCACCAATATATG	23
novel52_mature	0.269385	0.145703	0.169658	0.502173	0.520736	0.600541	0.842306	0.667382	0.35773	0.526686	0.416638	0.221929	0.203201	0.335437	0.0947506	0.379136	0.340624	0.428087	CCTTTCAGATCTGAGCCTC	19
novel52_star	0	0	0.0678631	0	0	0	0	0	0	0	0	0	0	0	0	0	0	0	GGCGATCCGGATGGCATAAG	20
novel53_mature	0.303058	0.254981	0.339315	0.107608	0.138863	0.20018	0.680324	0.407845	0.613252	0.427932	0.208319	0.184941	0.237068	0.396426	0.505337	0.172335	0.238437	0.428087	AGGTGTCCGTTCTAAATGATCTT	23
novel54_mature	0.168366	0.0728516	0.271452	0.322825	0.173579	0.133453	0.291567	0.148307	0.204417	0.362097	0.208319	0.147953	0.237068	0.548897	0.315835	0.482537	0.306561	0.395158	TTTGCTGGTGGTCATCTAAT	20
novel54_star	0.0336732	0.0728516	0	0.251086	0.24301	0.10009	0.0323964	0.222461	0.204417	0.131671	0.173599	0.147953	0.169334	0.304943	0.157918	0.137868	0.238437	0.131719	TTAGATGATCATCAACAAACA	21
novel55_mature	0.370405	0.145703	0.475042	0.215217	0.208294	0.40036	0.129585	0.11123	0.153313	0.164589	0.173599	0.184941	0.270935	0.365931	0.189501	0.275736	0.0340624	0.164649	CCTAAGAAGACATGATCCCAAGC	23
novel56_mature	0	0	0	0	0	0	0.129585	0	0	0.0329179	0.0694396	0	0	0	0.0315835	0.034467	0.0340624	0.0329298	TTGAATTCAGATGGCACAGGG	21
novel57_mature	0.235712	0.327832	0.407179	0.68152	0.416589	0.50045	0.259171	0.407845	0.204417	0.691275	0.312478	0.258917	0.270935	0.182966	0.189501	0.206802	0.238437	0.0987894	TTTTTAACAAGGCTGCGAGAGG	22
novel58_mature	0.370405	0.109277	0.407179	1.11195	1.00676	0.934174	0.615531	1.77969	1.78865	0.592522	1.24991	1.14663	0.474136	0.304943	0.53692	0.482537	0.442811	0.559806	ATTCTGTAACAAAACTTCATG	21
novel58_star	0	0	0	0	0	0	0	0	0	0	0	0	0	0	0	0.0689339	0	0	ATGAAGAGTTAGGGCGAGAAA	21
novel59_mature	0	0	0	0	0	0	0	0.0370768	0	0	0	0	0	0	0	0	0	0	GGGATTGAGGAATTTTGAAAA	21
novel59_star	0	0	0.0339315	0	0.0347157	0	0	0	0	0	0	0	0	0	0	0	0	0	CCAAGAGGTGGCATGATGC	19
novel60_mature	0.168366	0.0364258	0.203589	0.179347	0.138863	0.20018	0.421153	0.222461	0.408835	0.395014	0.243039	0.0739764	0.101601	0.121977	0.347419	0.275736	0.102187	0.0658596	TTATCGGAAAGTTTTGCTGCT	21
novel61_mature	0.606117	0.145703	0.373247	0.538042	0.347157	0.40036	0.0647927	0.0741536	0.102209	0.362097	0.208319	0.258917	0.0338668	0.0914829	0.157918	0	0.13625	0	TGATAATCTAGGAGATGACGC	21
novel61_star	0	0	0	0	0	0	0	0	0	0	0.0347198	0	0	0	0	0	0	0	TTTTCTCCTTGTGACTCGGGT	21
novel62_mature	0.101019	0	0.0678631	0.143478	0.173579	0.10009	0.0971891	0	0.0511043	0.164589	0.0694396	0.110965	0.0677337	0.0609886	0.126334	0.034467	0.0340624	0.0658596	AGGCGGTGATGATAATTGTTC	21
novel63_mature	0.572444	0.837794	0.542905	0.68152	1.14562	0.667267	0.323964	0.630306	0.255522	0.757111	1.35407	1.14663	0.237068	0.548897	0.379003	0.137868	0.0681248	0.0658596	CCACATCTGGTCCGGGCACTG	21
novel63_star	0.942849	3.20547	0.780426	1.47065	1.45806	1.43462	0.485945	0.519075	0.664356	1.05337	1.84015	0.924705	0.982138	0.487909	1.07384	0.206802	0.0681248	0.0987894	GCCCGGGCCAGCAGTGGTGT	20
novel64_star	0	0	0.0339315	0	0	0	0	0	0	0	0	0	0	0	0	0	0	0	TGGAACACACCATTGGAATAG	21
novel66_mature	5.82546	3.78828	7.09169	3.22825	2.29124	2.66907	4.92425	2.44707	3.06626	3.09428	2.08319	1.66447	2.70935	2.74449	3.22152	1.17188	1.97562	1.5477	CATGATATTGGTTCGGCTCACC	22
novel66_star>novel88_star	0.235712	0.0364258	0.475042	0	0.0694315	0	0	0.0370768	0	0	0.0347198	0.0369882	0.0338668	0.0304943	0.0947506	0.034467	0	0	AGCCGAACCAATATCACTCT	20
novel67_mature	0.168366	0.218555	0	0.251086	0.104147	0.20018	0.0323964	0.148307	0.35773	0.131671	0.0694396	0.221929	0.0677337	0.0304943	0.126334	0.137868	0	0.0329298	GCTGACCGGCGCGATCCGCG	20
novel68_mature	2.7612	1.56631	2.5788	3.76629	3.33271	4.17042	1.39304	1.77969	1.1243	5.06935	3.71502	3.29195	2.47228	3.81179	2.33718	0.137868	0.0681248	0.0658596	TCCAACGATGCAGGAGCTGTCT	22
novel69_mature>novel70_mature	0	0	0	0	7.98462	0.166817	11.9543	10.7152	0	0	0.208319	6.91679	6.7395	10.8255	9.25398	7.23806	9.19684	0	TTGACAGAAGAGAGCGAGC	19
novel69_star>novel70_star	2.02039	2.03985	1.45906	0.896737	1.42334	2.06853	2.07337	4.26383	2.50411	1.81048	2.15263	2.44122	0.575736	1.89065	1.10542	2.86076	4.01936	3.0954	GCTCCCTTCCTTCTGTCAGCT	21
novel7_mature>novel8_star	111.357	89.3525	223.575	213.782	167.365	170.086	160.07	98.8838	133.842	190.167	117.318	102.494	142.004	154.637	153.812	83.9615	55.8964	56.1782	TTCATTAGGCTCACATATTTTC	22
novel7_star>novel8_mature>novel9_star	26.2987	14.3882	31.1831	37.1608	18.2952	24.1884	195.674	92.3954	136.806	75.5136	44.8233	34.399	28.3127	34.7635	40.9007	155.687	127.325	122.334	AAGTATGTGACCTAATGAATC	21
novel71_mature	676.696	389.428	653.725	519.139	381.699	413.372	737.892	463.534	575.537	861.098	516.492	440.123	396.411	427.469	365.137	555.504	452.042	507.02	ACCTAGCTCTGATACCAATTTAAAT	25
novel71_star	10.8428	9.36143	21.5465	19.1184	9.40796	9.20829	12.2134	6.41429	11.0385	15.7677	10.3118	6.91679	13.4451	18.4186	22.0453	9.37501	10.934	10.0436	CAAATTGGTATTGATCTAGGTT	22
novel73_mature>novel74_mature>novel75_mature	0.673463	0.43711	0.407179	0.107608	0.0694315	0.10009	0.226775	0.0370768	0.255522	0.691275	0.416638	0.332894	0.237068	0.487909	0.157918	0.482537	0.340624	0.296368	TGGCAGGACTATTCTTGGTTAGC	23
novel73_star>novel74_star>novel75_star	0	0	0.0678631	0	0	0	0.0323964	0	0	0.0329179	0	0	0	0	0	0	0	0	CCAAGAATGGCTTGCCTATA	20
novel77_mature	0.269385	0.291406	0.305384	0.358695	0.520736	0.333634	0.194378	0.185384	0.102209	0.263343	0.277759	0.295906	0.270935	0.335437	0.315835	0.172335	0.13625	0.329298	ATCTGATAAGCAATCGAGCCGAGC	24
novel77_star	0	0	0	0	0.0347157	0	0	0	0	0	0	0	0	0	0	0	0	0	ATTTTTATTAATTGAGCTCA	20
novel78_mature	0.269385	0.145703	0.475042	0.251086	0.104147	0.166817	0.550738	0.370768	0.511043	0.790029	0.555517	0.480847	0.270935	0.21346	0.379003	0.723806	0.510936	0.461017	TTTGTGCGTGAATCTAAGGGG	21
novel79_mature>novel114_mature>novel115_mature	0	0	0	0	0	0.0333634	0	0	0	0	0	0	0	0	0	0	0.0340624	0	TGGAGAATCTGTTGGATG	18
novel80_mature	0.101019	0.0364258	0	0.107608	0.0694315	0.0333634	0.0323964	0.0370768	0	0	0	0	0.101601	0.0304943	0	0.034467	0.0681248	0.0329298	TGGGATTGTCTTGGAGCC	18
novel81_mature>novel92_mature	1.17856	0.764942	1.49299	1.50652	1.90936	2.26871	1.10148	1.18646	0.35773	1.94215	1.66655	1.66447	1.08374	1.52471	1.04226	0.034467	0.0340624	0.0658596	GAGCTTCCTTCAGTCCAGTC	20
novel82_mature	0.269385	0.109277	0.44111	0.394564	0.312442	0.166817	0.35636	0	0.153313	0.164589	0.243039	0.0739764	0.338668	0.335437	0.53692	0.0689339	0.102187	0.131719	ATGCAAGTCGAACGAAGG	18
novel83_mature	0.942849	0.619239	1.62871	2.15217	0.902609	0.967538	0.518342	0.481998	0.35773	1.44839	0.694396	0.480847	0.948271	1.15878	1.01067	0.44807	0.238437	0.0987894	TCAAACTGTGCTGTACGAACGC	22
novel84_mature	0.202039	0.0364258	0.0678631	0	0	0.10009	0.0971891	0.11123	0	0.0658357	0.0347198	0.0739764	0.0338668	0.0609886	0	0.103401	0.13625	0.0658596	GACGGAAAGACCCTATGC	18
novel85_mature	0	0.0728516	0	0	0	0	0	0	0	0	0.0347198	0	0	0.0304943	0.0315835	0	0	0.0329298	CGTCGGCTGGGGCCTCGGC	19
novel87_mature	17.9478	23.0211	16.7961	10.5098	18.8159	20.6519	18.9195	26.8807	17.4777	22.6146	18.8529	25.8917	10.0923	13.387	12.665	11.443	13.6931	11.7559	TTTCCTATCCCTCCCATACCCA	22
novel87_star	0	0	0	0	0.0347157	0	0	0	0	0	0	0	0	0	0	0	0	0	GCGGAGGGTAAAGAAATGGGAG	22
novel88_mature	0.673463	0.182129	0.610768	0.0358695	0.312442	0.20018	0.0323964	0.0741536	0.102209	0.296261	0.0694396	0.0369882	0.440269	0.243954	0.347419	0.241269	0.0681248	0.0658596	ATGATATTGGTTCGGCTCACA	21
novel89_mature	1.85202	3.93399	2.10376	0.824998	1.63164	1.13435	0.0647927	0.0370768	0.102209	0.790029	0.937435	0.924705	0.541869	0.64038	0.221085	0.206802	0.272499	0.131719	GCTGCTCCCATGCGCGTCGGCCGCG	25
novel89_star	0.673463	1.60274	0.576836	0.824998	0.48602	0.600541	0	0	0.0511043	0.592522	0.416638	0.517835	0.372535	0.396426	0.0631671	0.034467	0.0340624	0.0987894	CGCGGACGCCGCGGTGTCGAGCAGCT	26
novel9_mature	0.538771	0.218555	0.814357	0.143478	0.694315	0.20018	0.0647927	0.148307	0.153313	0.625439	0.0694396	0.147953	0.440269	0.548897	0.126334	0.34467	0.0681248	0.131719	TCATTAGGCTCACATATTTTC	21
novel90_mature>novel98_mature	1.01019	0.910645	0.712562	0.573912	0.277726	0.433724	0.0647927	0.148307	0.204417	0.263343	0.277759	0.517835	0.270935	0.274449	0.284252	0.206802	0.170312	0.0329298	CGGCGTCGCGTCGATCCT	18
novel91_mature	2.52549	2.22197	1.45906	1.68587	2.32595	2.80252	2.00857	3.07737	1.73755	0.954618	1.38879	1.51652	0.948271	1.12829	0.947506	1.65441	1.43062	1.15254	GCTGACCGGCGCGATCCCGCT	21
novel93_mature	0.909175	0.655665	0.339315	0.860867	1.1109	1.50135	0.680324	1.446	0.817669	0.427932	0.312478	1.03567	0.846671	0.64038	0.852756	1.72335	0.749372	0.493947	GAGGGCGCGGCGGTCGCG	18
novel94_mature	0.0673463	0.0728516	0.169658	0.179347	0.104147	0.0667267	0.0647927	0.222461	0.0511043	0.263343	0.138879	0.184941	0.101601	0.243954	0.347419	0.103401	0	0.197579	CTTCGGGGACGCGGTGACC	19
novel96_mature	1.64999	1.78486	1.69658	1.00435	1.63164	1.43462	3.01286	2.18753	2.19749	1.71173	1.87487	1.14663	0.575736	1.6162	0.97909	1.41315	1.83937	1.28426	GTGCGGATCTTGGTGGTA	18
novel97_mature	0.0336732	0.0364258	0.0678631	0.0717389	0.0347157	0.0333634	0.0323964	0	0	0.0658357	0.0347198	0.0739764	0.0338668	0	0.0947506	0.034467	0	0.0329298	TCTGAATTCTGAATGAGC	18
novel99_mature	0.63979	0.546387	1.11974	0.179347	0.0694315	0.166817	0.745116	0.333691	0.408835	0.0658357	0.104159	0.147953	0.169334	0.21346	0.221085	0.482537	0.817497	0.658596	CAGGTGGTGGAACTGGTAGAC	21

## Sheet: Table S5
Supplementary Table 5. Classification of miRNAs into classical families.
miFam_id	Read counts																		miRNA numbers	miRNAs
	FP_S2_Root1	FP_S2_Root2	FP_S2_Root3	FP_S3_Root1	FP_S3_Root2	FP_S3_Root3	FP_S4_Root1	FP_S4_Root2	FP_S4_Root3	SP_S2_Root1	SP_S2_Root2	SP_S2_Root3	SP_S3_Root1	SP_S3_Root2	SP_S3_Root3	SP_S4_Root1	SP_S4_Root2	SP_S4_Root3
MIR1023	0	0	0	0	0	0	0	0	0	1	0	0	0	0	0	0	0	0	1	ppt-miR1023a-5p
MIR1027	0	0	1	0	0	0	0	0	0	0	0	0	0	0	0	0	0	0	1	ppt-miR1027a>ppt-miR1027b>ppt-miR1027c
MIR1120	0	0	0	0	1	1	0	0	0	1	1	0	1	2	0	0	0	0	3	tae-miR1120a;tae-miR1120b-3p;tae-miR1122c-3p
MIR1122	40	24	17	19	20	24	8	16	6	11	12	16	20	11	28	27	15	10	7	bdi-miR1127;bdi-miR1135;bdi-miR5171a>bdi-miR5171b;tae-miR1127b-3p;tae-miR1128;tae-miR1133;tae-miR1135
MIR1151	0	0	0	0	0	0	0	0	0	0	0	0	1	1	0	0	0	0	1	cre-miR1151b-3p
MIR1432	2	0	1	1	2	1	0	0	1	0	0	0	0	1	0	0	0	0	2	sbi-miR1432>zma-miR1432-5p;ssp-miR1432
MIR1510	0	0	1	0	0	0	0	0	0	0	0	0	0	0	0	0	0	0	1	gma-miR1510b-5p
MIR1511	2805	1596	2937	1783	1623	1937	1683	1275	888	2608	1819	1421	1081	1662	1477	1097	766	866	4	fve-miR1511;lja-miR1511-3p;mdm-miR1511;ppe-miR1511-5p
MIR1520	2	1	1	1	2	1	0	0	0	0	1	0	0	3	0	1	0	0	2	gma-miR1520f-5p;gma-miR1521b
MIR156	10051	6882	11402	9049	7134	8600	12242	7641	5374	11912	7357	5687	8885	13035	12555	8226	7814	8020	56	ahy-miR156b-5p>aly-miR157a-5p>aly-miR157b-5p>aly-miR157c-5p>aof-miR156b>ath-miR157a-5p>ath-miR157b-5p>ath-miR157c-5p>atr-miR156a>atr-miR156c>bna-miR156b>bna-miR156c>bna-miR156g>bol-miR157a>bra-miR157a>cca-miR156c>cme-miR156b>cpa-miR156e>cpa-miR156f>fve-miR156f>fve-miR156g-5p>gma-miR156d>gma-miR156c>gma-miR156i>gma-miR156j>gma-miR156l>gma-miR156m>gra-miR157a>gra-miR157b>han-miR156c>lus-miR156b>lus…
MIR158	0	0	1	2	3	1	0	1	0	0	0	1	29	5	25	4	1	3	3	aly-miR158a-3p>ath-miR158a-3p;aly-miR158b-3p;ath-miR158b
MIR159	73005	45660	67730	69272	52198	59390	39677	35780	21936	80404	57317	53099	47878	55140	54012	26065	23588	24622	66	aau-miR319>aly-miR319a-3p>aly-miR319b-3p>amg-miR319>aof-miR319a>aqc-miR319>ath-miR319a>ath-miR319b>bra-miR319-3p>cca-miR319>gma-miR319h>gma-miR319j>gma-miR319k>gma-miR319m>hbr-miR319>lus-miR319a>mdm-miR319a>mdm-miR319b-3p>mes-miR319a>mes-miR319b>mes-miR319c>mes-miR319d>mes-miR319e>mtr-miR319d-3p>nta-miR319a>nta-miR319b>rco-miR319a>rco-miR319b>rco-miR319c>sly-miR319b>stu-miR319a-3p>tae-miR319>vun-…
MIR160	438	365	395	275	335	471	413	553	333	439	451	470	296	409	396	523	588	606	22	aau-miR160;ahy-miR160-5p>aof-miR160a>bdi-miR160e-5p>cme-miR160d>cpa-miR160d>mes-miR160f>mtr-miR160c>osa-miR160f-5p>ptc-miR160e-5p>ptc-miR160f>rco-miR160c>sbi-miR160f>tcc-miR160a>vca-miR160-5p;aly-miR160a-3p>ath-miR160a-3p>bra-miR160a-3p>cpa-miR160c-3p>cpa-miR160f-3p>csi-miR160a-3p>ptc-miR160b-3p>ptc-miR160c-3p;aly-miR160a-5p>aly-miR160b-5p>aly-miR160c-5p>aof-miR160c>aqc-miR160b>ata-miR160b-5p>ata…
MIR161	0	0	1	0	3	0	1	0	1	1	1	1	21	4	35	3	0	3	2	aly-miR161-5p.1;ath-miR161.1
MIR162	0	0	0	0	0	0	0	0	0	1	1	0	4	1	1	0	0	1	3	aau-miR162>aly-miR162a-3p>aly-miR162b-3p>ath-miR162a-3p>ath-miR162b-3p>bra-miR162-3p>cme-miR162>cpa-miR162a>csi-miR162-3p>eun-miR162-3p>fve-miR162-3p>ghr-miR162a>gma-miR162b>gma-miR162c>hpe-miR162a>htu-miR162a>lus-miR162a>lus-miR162b>mdm-miR162a>mdm-miR162b>mes-miR162>mtr-miR162>nta-miR162a>nta-miR162b>osa-miR162a>pde-miR162>ppe-miR162>ptc-miR162a>ptc-miR162b>rco-miR162>sbi-miR162>sly-miR162>stu-…
MIR163	0	0	0	0	0	0	0	0	0	2	0	0	8	3	4	1	0	0	2	aly-miR163-5p.1;ath-miR163
MIR164	17528	20710	16492	23545	28855	33335	12288	14801	7850	31944	26289	27525	15544	18807	16067	6179	6818	6653	27	aly-miR164a-3p;aly-miR164a-5p>aly-miR164b-5p>aof-miR164>ata-miR164b-5p>ata-miR164c-5p>ath-miR164a>ath-miR164b-5p>atr-miR164a>atr-miR164b>bdi-miR164b>bdi-miR164a-5p>bdi-miR164e>bna-miR164a>bra-miR164a>cas-miR164>cme-miR164c>cme-miR164d>cpa-miR164a>cpa-miR164b>cpa-miR164c>csi-miR164a-5p>csi-miR164b-5p>csi-miR164c-5p>csi-miR164d-5p>ctr-miR164>fve-miR164a-5p>fve-miR164b>ghr-miR164>gma-miR164a>gma-miR…
MIR166	82666	54880	84088	49050	74708	80227	76089	79484	45984	71863	71630	76213	38652	60133	54941	58964	68397	71579	61	aly-miR165a-3p>aly-miR165b-3p;aly-miR166a-3p>aly-miR166b-3p>aly-miR166c-3p>aly-miR166d-3p>aly-miR166e-3p>aly-miR166f-3p>aly-miR166g-3p>aly-miR166h-3p>aof-miR166d>aqc-miR166e>aqc-miR166b>ata-miR166a-3p>ata-miR166e-3p>ata-miR166b-3p>ata-miR166d-3p>ath-miR166a-3p>ath-miR166b-3p>ath-miR166c>ath-miR166d>ath-miR166e-3p>ath-miR166f>ath-miR166g>atr-miR166a>atr-miR166c>atr-miR166d>bdi-miR166a-3p>bdi-miR16…
MIR167	6715	3038	5431	4138	2874	3708	4705	3192	2303	7376	4143	4100	3420	3782	3571	4628	3368	3720	29	ahy-miR167-5p>cme-miR167c>cpa-miR167c>csi-miR167b-5p>gma-miR167e>gma-miR167f>lus-miR167b>mes-miR167g>mes-miR167h>ptc-miR167f-5p>ptc-miR167g-5p>tcc-miR167c;aly-miR167a-3p>ath-miR167a-3p>cas-miR167a;aly-miR167a-5p>aly-miR167b-5p>aof-miR167a>ata-miR167c-5p>ata-miR167a-5p>ata-miR167e-5p>ath-miR167a-5p>ath-miR167b>bdi-miR167a>bdi-miR167b>bdi-miR167f>bna-miR167c>bra-miR167a>bra-miR167b>bra-miR167c>bra-…
MIR168	8645	7082	7389	4487	6661	8061	18786	20190	11412	18657	17700	17396	4569	6502	5895	15236	19199	18650	16	aau-miR168;aly-miR168a-3p>ath-miR168a-3p>bra-miR168b-3p>bra-miR168c-3p>cas-miR168>csi-miR168-3p>fve-miR168-3p>mtr-miR168c-3p>ptc-miR168a-3p>ptc-miR168b-3p>sly-miR168b-3p;aly-miR168a-5p>aly-miR168b-5p>aof-miR168a>ath-miR168a-5p>ath-miR168b-5p>atr-miR168>bna-miR168a>bra-miR168a-5p>cca-miR168a>ccl-miR168>crt-miR168>csi-miR168-5p>fve-miR168-5p>gma-miR168a>lus-miR168a>lus-miR168b>mdm-miR168a>mdm-miR16…
MIR169	2	0	3	2	0	1	1	0	1	2	1	0	2	1	0	0	1	0	10	aly-miR169m-3p;aof-miR169c>atr-miR169a>atr-miR169c>csi-miR169b-5p>csi-miR169c-5p>csi-miR169d-5p>csi-miR169e-5p>csi-miR169f-5p>csi-miR169h-5p>csi-miR169i-5p>csi-miR169j-5p>csi-miR169l-5p>csi-miR169p-5p>csi-miR169q-5p>fve-miR169a>fve-miR169b>fve-miR169c>fve-miR169d>mes-miR169ac>sbi-miR169d-5p>stu-miR169a-5p>stu-miR169b-5p>stu-miR169c-5p>stu-miR169d-5p>stu-miR169e-5p>stu-miR169f-5p>stu-miR169g>stu-m…
MIR171	421	244	427	218	193	196	467	319	209	323	175	206	199	218	212	244	262	229	51	aly-miR170-3p>ath-miR170-3p>stu-miR171c-3p;aly-miR171a-3p>ath-miR171a-3p>atr-miR171a>atr-miR171c>bdi-miR171a>bna-miR171f>bra-miR171e>ccl-miR171>cme-miR171e>cme-miR171a>cme-miR171g>mdm-miR171c>mdm-miR171d>mdm-miR171e>osa-miR171a>sbi-miR171g>sbi-miR171j>tcc-miR171a>vvi-miR171e>zma-miR171n-3p;aly-miR171b-3p>aly-miR171c-3p>ata-miR171c-3p>ath-miR171b-3p>ath-miR171c-3p>bna-miR171a>bna-miR171b>bna-miR17…
MIR172	567	347	775	870	646	736	305	291	248	572	410	300	580	763	820	283	179	190	36	aau-miR172>vvi-miR172d;aly-miR172a-3p>aly-miR172b-3p>aof-miR172>aqc-miR172a>ata-miR172b-3p>ath-miR172a>ath-miR172b-3p>bdi-miR172a-3p>bna-miR172a>bol-miR172a>bol-miR172b>bra-miR172a>bra-miR172b-3p>cas-miR172a-3p>cas-miR172b>cca-miR172>cme-miR172b>cme-miR172c>csi-miR172b-3p>dpr-miR172a>dpr-miR172b>egu-miR172a>egu-miR172b>egu-miR172c>eun-miR172a-3p>eun-miR172b-3p>eun-miR172c-3p>fve-miR172b>fve-miR17…
MIR1846	0	0	0	0	0	0	0	0	0	0	0	0	0	0	0	2	0	0	1	osa-miR1846d-5p
MIR1862	0	0	0	0	0	0	0	0	0	1	1	0	0	0	0	0	0	1	2	mtr-miR5205a;osa-miR1862d
MIR1863	16	6	26	4	6	11	11	6	6	9	10	10	9	10	13	12	10	10	4	bdi-miR7782-3p;osa-miR1863a;osa-miR1863b;osa-miR1873
MIR1882	0	0	0	0	0	0	0	0	0	1	0	0	0	0	0	0	0	0	1	osa-miR1882e-3p
MIR2084	0	0	0	0	0	0	0	0	0	0	0	0	0	0	1	0	0	0	1	ppt-miR2084
MIR2111	2	2	7	0	2	3	2	1	3	2	2	1	0	2	1	8	3	4	6	aly-miR2111a-5p>aly-miR2111b-5p>aly-miR2111c-5p>ath-miR2111a-5p>ath-miR2111b-5p>bna-miR2111b-5p>bna-miR2111a-5p>bna-miR2111d>bra-miR2111a-5p>bra-miR2111b-5p>cme-miR2111a>cme-miR2111b>gma-miR2111b>gma-miR2111c>gma-miR2111e>gma-miR2111f>lja-miR2111-5p>mdm-miR2111a>mdm-miR2111b>mes-miR2111a>mes-miR2111b>mtr-miR2111c>mtr-miR2111d-5p>mtr-miR2111e-5p>mtr-miR2111g-5p>mtr-miR2111h>mtr-miR2111i>mtr-miR211…
MIR2118	1	0	0	0	0	1	0	0	0	0	0	0	0	0	0	0	0	0	2	ata-miR2118a-3p>ata-miR2118b-3p;zma-miR2118f
MIR2119	0	0	0	0	0	0	0	1	0	0	0	0	0	0	0	0	0	0	1	gma-miR2119>pvu-miR2119
MIR2592	0	0	0	0	0	1	0	0	0	0	0	1	0	0	0	0	0	0	1	mtr-miR2592bp-3p
MIR2629	0	0	0	0	0	0	1	0	0	0	0	0	0	0	0	0	0	0	1	mtr-miR2629h
MIR2630	0	0	0	0	0	0	0	2	0	0	0	0	0	0	0	0	0	0	1	lja-miR11155b-5p
MIR2655	0	0	0	0	0	1	0	0	0	0	0	0	0	0	0	0	0	0	1	mtr-miR2655b
MIR319	744	3750	274	4204	5708	4744	2253	1638	784	2165	2194	1666	3108	5691	2971	1035	185	850	12	aly-miR319c-3p>aly-miR319d-3p>ath-miR319c>mes-miR319g>pvu-miR319c>rco-miR319d>sly-miR319c-3p;aof-miR319b>atr-miR319b>atr-miR319d>atr-miR319e>cas-miR319c>csi-miR159d>fve-miR319>tcc-miR319>vvi-miR319e;atr-miR319a>atr-miR319c>cme-miR319b>cme-miR319a>ctr-miR319>gma-miR319a>gma-miR319b>gma-miR319e>lus-miR319b>mtr-miR319a-3p>mtr-miR319b-3p>pab-miR319a>pab-miR319b>pab-miR319c>pab-miR319f>pab-miR319g>pab…
MIR3630	65	40	47	46	40	57	67	78	57	49	38	43	44	69	48	58	58	40	2	han-miR3630-3p;vvi-miR3630-3p
MIR390	203	150	161	66	72	86	632	617	361	144	123	95	37	55	71	229	238	281	13	aly-miR390a-3p>ath-miR390a-3p>cas-miR390a-3p>csi-miR390a-3p>lja-miR390a-3p>lja-miR390b-3p>sly-miR390b-3p;aly-miR390a-5p>aly-miR390b-5p>aof-miR390>ata-miR390-5p>ath-miR390a-5p>ath-miR390b-5p>atr-miR390.2>bdi-miR390a-5p>bna-miR390a>bna-miR390b>bna-miR390c>bra-miR390-5p>cas-miR390a-5p>cas-miR390b>cme-miR390b>cme-miR390d>cme-miR390a>cme-miR390c>cpa-miR390a>cpa-miR390b>csi-miR390a-5p>fve-miR390a>fve-m…
MIR393	5	6	7	1	6	7	18	14	8	0	3	1	2	7	6	11	8	8	10	aly-miR393a-3p>ath-miR393a-3p>cas-miR393-3p;aly-miR393a-5p>aly-miR393b-5p>ath-miR393a-5p>ath-miR393b-5p>atr-miR393>cas-miR393-5p>cpa-miR393>gma-miR393c-5p>gma-miR393d>gma-miR393e>gma-miR393f>gma-miR393g>htu-miR393a>htu-miR393b>htu-miR393c>mes-miR393b>stu-miR393-5p>tcc-miR393a>zma-miR393b-5p;aof-miR393a;aof-miR393b>fve-miR393b>ghr-miR393>mdm-miR393a>mdm-miR393b>mdm-miR393c>mes-miR393c>mes-miR393d>…
MIR394	1030	703	523	823	682	899	293	605	234	807	667	761	729	947	616	352	231	376	4	ahy-miR394>aly-miR394a-5p>aly-miR394b-5p>aof-miR394>ata-miR394-5p>ath-miR394a>ath-miR394b-5p>atr-miR394>bdi-miR394>bna-miR394a>bna-miR394b>cca-miR394>cme-miR394b>cme-miR394a>cpa-miR394a>cpa-miR394b>csi-miR394a>csi-miR394b-5p>fve-miR394>ghr-miR394b>ghr-miR394a>gma-miR394b-5p>gma-miR394a-5p>gma-miR394c-5p>gma-miR394d>gma-miR394e>gma-miR394f>gma-miR394g>lus-miR394a>lus-miR394b>mdm-miR394a>mdm-miR394…
MIR395	118	74	108	109	115	136	164	196	104	157	145	120	122	100	122	94	103	99	27	aly-miR395b-3p>aly-miR395f-3p>aly-miR395h-3p>ath-miR395b>ath-miR395c>ath-miR395f>bna-miR395d>bna-miR395e>bna-miR395f>cas-miR395b>cas-miR395c-3p;aly-miR395c-3p;aly-miR395d-3p>aly-miR395e-3p>aly-miR395g-3p>ath-miR395a>ath-miR395d>ath-miR395e>atr-miR395>bna-miR395a>bna-miR395b>bna-miR395c>bra-miR395d-3p>bra-miR395b-3p>bra-miR395c-3p>bra-miR395a-3p>cas-miR395a>cas-miR395d-3p>cme-miR395a>cme-miR395e>c…
MIR396	12797	8102	14135	11330	10628	11990	42075	29833	24752	17294	15391	12804	10669	14384	13432	29573	28019	31322	36	aau-miR396>aly-miR396a-5p>amg-miR396>aof-miR396b>aqc-miR396a>ata-miR396e-5p>ath-miR396a-5p>bcy-miR396a>bdi-miR396d-5p>bdi-miR396c-5p>bgy-miR396a>cas-miR396a>cme-miR396b>cpa-miR396>csi-miR396a-5p>csi-miR396b-5p>dpr-miR396>eun-miR396b-5p>fve-miR396a-5p>fve-miR396c-5p>fve-miR396d>ghr-miR396a>ghr-miR396b>gma-miR396a-5p>gma-miR396i-5p>hbr-miR396b>lja-miR396>lus-miR396a>lus-miR396c>mdm-miR396b>mes-miR3…
MIR397	65	35	64	23	9	21	566	229	221	21	6	8	20	22	23	224	215	168	21	aly-miR397a-5p>aly-miR397b-5p>ath-miR397a>bdi-miR397a>cas-miR397>cme-miR397>csi-miR397-5p>fve-miR397>gma-miR397a>gma-miR397b-5p>lus-miR397b>mes-miR397b>mtr-miR397-5p>osa-miR397a>ppe-miR397>ptc-miR397a>rco-miR397>sbi-miR397-5p>ssl-miR397>tcc-miR397>vca-miR397-5p>vvi-miR397a;atr-miR397a;atr-miR397b;bdi-miR397b-5p>lus-miR397a;bna-miR397a>bna-miR397b;dpr-miR397>ptc-miR397b;eun-miR397a-5p;eun-miR397b-…
MIR398	228	161	222	108	183	227	1179	1263	721	160	135	144	163	202	243	852	1081	961	17	ahy-miR398>cas-miR398a-3p>cas-miR398b>lus-miR398b>lus-miR398c;aly-miR398a-3p>aqc-miR398a>ath-miR398a-3p>bol-miR398a-3p>cme-miR398b>csi-miR398a-3p>ghr-miR398>gma-miR398a>gma-miR398b-3p>gra-miR398>mdm-miR398a>mtr-miR398a-3p>osa-miR398a>ptc-miR398a>rco-miR398a>tcc-miR398b>vvi-miR398a;aly-miR398b-3p>ath-miR398b-3p>ath-miR398c-3p>bra-miR398-3p;aof-miR398>aqc-miR398b>bdi-miR398a>cca-miR398>cme-miR398a>…
MIR3980	2	0	0	0	0	0	0	0	0	0	0	0	0	0	0	0	0	0	1	osa-miR3980a-3p>osa-miR3980b-3p
MIR399	86	37	104	136	140	193	24	21	20	108	120	108	120	122	117	74	46	37	20	aly-miR399a-3p>aly-miR399h-3p>ath-miR399f>bdi-miR399d>bna-miR399a>bna-miR399b>cme-miR399c>csi-miR399a-3p>csi-miR399e-3p>lus-miR399a>lus-miR399c>lus-miR399e>mes-miR399b>mes-miR399c>mes-miR399d>mes-miR399g>ptc-miR399b>rco-miR399b>rco-miR399c>tcc-miR399b>tcc-miR399d>vvi-miR399e;aly-miR399a-5p;aly-miR399b-3p>aly-miR399c-3p>aof-miR399a>ath-miR399b>ath-miR399c-3p>csi-miR399d-3p>fve-miR399a>gma-miR399a>…
MIR403	2565	1032	2110	2187	1320	1745	6582	3761	3642	5222	3070	2610	2204	2055	1842	8567	4780	5920	9	aly-miR403a-3p>aly-miR403b-3p>ath-miR403-3p>bna-miR403>bra-miR403-3p>csi-miR403a-3p>csi-miR403b-3p>har-miR403a>hpe-miR403a>htu-miR403a>htu-miR403b>htu-miR403c>htu-miR403d>htu-miR403e>mdm-miR403a>mdm-miR403b>mes-miR403a>mes-miR403b>ppe-miR403>ptc-miR403a>ptc-miR403b>ptc-miR403c-3p>ptc-miR403d>rco-miR403a>rco-miR403b>tcc-miR403a>tcc-miR403b>vvi-miR403a>vvi-miR403b>vvi-miR403c>vvi-miR403d>vvi-miR403…
MIR408	454	419	520	172	281	386	2153	2372	1146	236	231	256	214	347	301	1113	1615	1485	11	ahy-miR408-3p>aly-miR408-3p>ath-miR408-3p>cas-miR408>cme-miR408>csi-miR408-3p>gma-miR408a-3p>gma-miR408b-3p>gma-miR408c-3p>lus-miR408a>mdm-miR408a>mes-miR408>mtr-miR408-3p>pta-miR408>ptc-miR408-3p>vun-miR408>vvi-miR408;aly-miR408-5p;aof-miR408>cca-miR408>fve-miR408>nta-miR408>ppt-miR408b>stu-miR408b-3p>vca-miR408-3p;ata-miR408-3p;ath-miR408-5p;bdi-miR408-3p>cpa-miR408>dpr-miR408>osa-miR408-3p>rco…
MIR414	0	1	1	0	0	1	0	0	0	1	0	0	0	0	0	0	0	0	1	osa-miR414
MIR4221	0	0	0	0	0	0	0	0	0	0	0	0	0	0	0	2	0	0	1	ath-miR4221
MIR4349	0	0	0	0	0	0	0	0	1	0	0	0	0	0	0	0	0	0	1	gma-miR4379
MIR4354	1	0	0	0	0	0	0	0	0	0	0	0	0	0	0	0	0	0	1	gma-miR4383
MIR4374	0	0	1	0	0	0	0	0	0	0	0	0	1	0	0	0	0	0	1	gma-miR4374a
MIR4414	459	416	661	527	418	489	281	138	101	1147	758	655	319	501	423	20	45	35	5	csi-miR156j-5p>mtr-miR4414a-5p;gma-miR4414a-5p;gma-miR4414b;mtr-miR4414a-3p;novel27_star>novel68_star
MIR477	8	2	8	2	3	12	2	4	2	5	3	1	6	1	4	6	4	1	16	aof-miR477a>mes-miR477i;aqc-miR477e>aqc-miR477a>aqc-miR477b;csi-miR477b-5p;csi-miR477c-3p;csi-miR477c-5p;csi-miR477d-5p;csi-miR477e-5p>lja-miR477-5p;fve-miR477a;mdm-miR477b;mes-miR477a>mes-miR477b>mes-miR477c>mes-miR477e;mes-miR477d;mes-miR477h;nta-miR477a;nta-miR477b;ppt-miR477h;stu-miR477a-5p
MIR481	4	1	0	6	1	1	1	0	0	1	2	3	3	1	4	2	1	0	2	gma-miR1511;osa-miR1871
MIR482	548	644	505	298	553	635	595	749	348	696	553	714	302	450	408	337	411	367	10	aly-miR472-3p>ath-miR472-3p;eun-miR482b-3p;fve-miR482c;ghr-miR482a>sly-miR482e-3p;gma-miR482b-3p>gma-miR482d-3p;gma-miR482c-5p;mdm-miR482b;novel87_mature;pgi-miR2118;pvu-miR482-5p
MIR5037	0	0	0	0	0	0	0	1	0	0	0	0	0	0	0	0	0	0	1	gma-miR5037d
MIR5048	0	0	0	0	0	0	0	0	0	0	0	0	0	0	0	0	1	0	1	hvu-miR5048a>hvu-miR5048b
MIR5050	0	0	0	0	0	0	0	0	0	0	0	1	0	0	0	0	0	0	1	hvu-miR5050
MIR5067	27	17	16	22	17	18	14	9	7	7	8	8	20	20	13	16	8	11	10	ata-miR5181-5p;bdi-miR5174c-3p;bdi-miR5174d-3p;bdi-miR5174d-5p;bdi-miR5174e-3p.1>bdi-miR5174b-3p;bdi-miR5174e-3p.2;bdi-miR5174e-5p.2;hvu-miR5049c;osa-miR5161;tae-miR5049-3p
MIR5148	0	0	1	0	0	0	0	0	0	0	0	0	0	0	0	0	0	0	1	osa-miR5148a>osa-miR5148b>osa-miR5148c
MIR5185	0	0	0	1	0	0	0	0	0	0	0	0	0	0	0	0	0	0	1	bdi-miR5185a-3p>bdi-miR5185b-3p>bdi-miR5185c-3p>bdi-miR5185d-3p>bdi-miR5185e-3p>bdi-miR5185f-3p>bdi-miR5185g-3p>bdi-miR5185h-3p>bdi-miR5185i-3p>bdi-miR5185j-3p>bdi-miR5185k-3p
MIR5225	27	10	22	26	11	18	9	18	4	19	4	9	9	6	11	10	3	2	2	mtr-miR5225a;mtr-miR5225b>mtr-miR5225c
MIR5267	0	0	0	0	0	0	0	0	0	0	0	0	1	0	0	0	0	0	1	mtr-miR2604
MIR5268	0	0	1	0	0	0	0	2	0	0	0	0	0	1	0	0	0	0	1	mtr-miR5268a>mtr-miR5268b
MIR5269	0	0	0	1	0	0	0	0	0	0	0	0	0	0	0	1	0	0	1	mtr-miR5269b
MIR5284	1	1	1	0	0	0	0	0	0	1	2	0	0	3	1	0	1	0	3	mtr-miR5284a>mtr-miR5284c>mtr-miR5284d>mtr-miR5284e>mtr-miR5284f>mtr-miR5284g;mtr-miR5284b;mtr-miR5284h
MIR5286	0	0	0	0	0	1	0	0	0	0	0	0	0	0	0	0	0	0	1	mtr-miR5286a
MIR529	29	19	28	21	24	22	31	34	18	39	24	20	24	36	22	39	16	21	10	ahy-miR156a>aof-miR156c>ath-miR156j>bdi-miR156j>cas-miR156j>hpa-miR156a;ahy-miR156c>far-miR156b>mdm-miR156t>mdm-miR156u>mdm-miR156v>mdm-miR156w>mes-miR156k;ath-miR156i;bdi-miR156a>far-miR156a>gma-miR156b>mtr-miR156a>osa-miR156k>rco-miR156e>sbi-miR156d>tcc-miR156a>zma-miR156j-5p;bdi-miR529-3p>zma-miR529-3p;cas-miR156i;gma-miR156f;osa-miR529a>sbi-miR529;ppt-miR529g;vvi-miR156h
MIR5291	0	0	0	0	0	0	0	0	0	0	0	0	0	0	1	0	0	0	1	mtr-miR5291a>mtr-miR5291b>mtr-miR5291c
MIR530	7	5	2	3	4	5	4	0	0	2	4	1	5	5	4	1	1	0	9	bdi-miR530a>bdi-miR530b;cme-miR530a>htu-miR530>lus-miR530a>lus-miR530b>mes-miR530a>ptc-miR530a>tcc-miR530b;csi-miR530a-5p;fve-miR530;gma-miR530a;mes-miR530b;mtr-miR530;osa-miR530-5p;tcc-miR530a
MIR535	0	0	0	1	0	0	0	0	0	0	0	0	0	0	0	0	0	0	1	mes-miR535b
MIR5534	0	0	0	0	0	0	0	0	0	0	0	1	0	0	0	0	0	0	1	osa-miR5534a
MIR5565	0	0	1	0	0	0	0	0	0	0	0	0	1	0	0	0	0	0	1	sbi-miR5565g-5p
MIR5568	0	0	0	0	0	0	0	0	0	0	0	0	0	0	0	1	0	0	1	sbi-miR5568c-3p
MIR5638	0	0	1	0	0	0	0	0	0	0	0	0	0	0	0	0	0	0	1	ath-miR5638b
MIR5642	0	0	0	1	0	0	0	0	0	0	0	0	0	0	2	0	0	0	1	ath-miR5642a>ath-miR5642b
MIR6108	0	0	0	0	0	0	0	0	0	0	0	0	0	1	0	0	0	0	1	cca-miR6108f
MIR6437	0	0	0	0	0	0	0	0	1	0	0	0	0	0	0	0	0	0	1	ptc-miR6437b>ptc-miR6437a
MIR6459	0	0	0	0	0	0	0	0	0	0	0	0	0	0	1	0	0	0	1	ptc-miR6459a-3p
MIR7121	0	0	0	0	0	0	0	0	0	1	0	0	0	0	0	0	0	0	1	mdm-miR7121d>mdm-miR7121e>mdm-miR7121f>mdm-miR7121g>mdm-miR7121h
MIR7484	0	0	0	0	0	0	0	0	0	0	0	0	0	0	0	0	0	1	1	gra-miR7584e
MIR7486	1	0	0	1	0	0	0	0	0	0	0	0	0	0	0	0	0	0	2	gra-miR7486f>gra-miR7486g;gra-miR7486i
MIR7496	0	0	0	0	0	0	0	0	0	0	0	0	0	0	1	0	0	0	1	ghr-miR7496a>ghr-miR7496b
MIR7504	0	0	0	0	0	0	1	0	0	0	0	0	0	0	0	0	0	0	1	gra-miR7504g
MIR7506	0	0	0	0	2	0	0	0	0	0	0	1	0	0	0	0	0	0	1	ghr-miR7506
MIR7757	0	0	0	0	0	0	0	0	1	0	0	0	0	0	0	0	0	1	1	tae-miR7757-5p
MIR7768	1	0	0	0	0	0	0	0	0	0	0	0	0	0	0	0	0	0	1	bdi-miR7768a-3p>bdi-miR7768b-3p
MIR7784	0	0	0	0	0	0	0	0	0	0	0	0	0	0	0	0	1	0	1	bdi-miR7784a-5p>bdi-miR7784b-5p
MIR8005	0	0	1	1	0	1	0	0	0	2	0	0	1	0	0	0	1	1	1	stu-miR8005a>stu-miR8005b-3p>stu-miR8005c
MIR812	0	0	0	0	0	0	0	0	0	1	0	0	0	0	0	0	0	0	1	osa-miR812n-3p>osa-miR812t>osa-miR812u
MIR818	1	1	1	3	0	2	3	2	0	1	3	0	2	0	1	0	0	1	2	mtr-miR5205b;osa-miR1439
MIR824	0	0	0	1	0	0	0	0	0	0	0	0	0	1	0	0	0	0	2	aly-miR824-3p>ath-miR824-3p;aly-miR824-5p>ath-miR824-5p>bna-miR824>bol-miR824>bra-miR824
MIR825	0	0	0	0	0	0	1	0	0	0	0	0	0	0	0	1	0	0	1	aly-miR825-5p>cas-miR825
MIR827	1	2	0	7	8	5	1	6	4	4	5	4	5	10	6	5	7	4	3	ath-miR827;novel54_star;zma-miR827-5p
MIR845	20098	10692	19267	14474	10996	12392	22779	12504	11263	26162	14877	11901	11709	14021	11562	16119	13271	15398	4	aly-miR845a-3p;bdi-miR845;novel71_mature;vvi-miR845c
MIR846	0	0	0	0	0	0	0	0	0	0	0	0	2	1	2	0	0	0	1	aly-miR846-3p>ath-miR846-3p
MIR8553	0	1	0	0	0	0	0	0	0	0	0	0	0	0	0	0	0	0	1	atr-miR8553a
MIR856	0	0	0	1	0	0	0	0	0	0	0	0	0	0	0	0	0	0	1	ath-miR856
MIR858	619	296	617	1074	707	796	594	353	280	1172	671	567	871	1058	1042	321	166	224	7	aly-miR858-3p;aly-miR858-5p>ath-miR858a>cas-miR858;ath-miR858b>pab-miR858b;cme-miR858;csi-miR858-3p>ppe-miR858;mdm-miR858;pab-miR858a
MIR8663	0	1	0	0	0	0	0	0	0	0	0	0	0	0	0	0	0	0	1	gra-miR8663b
MIR869	0	0	0	0	0	0	0	0	0	0	0	0	1	0	0	0	0	0	1	ath-miR869.2
MIR8757	0	0	0	0	0	0	0	0	0	0	0	1	0	1	0	1	0	0	1	gra-miR8757a
MIR946	0	0	0	0	0	0	0	0	0	0	0	0	0	1	0	0	0	0	1	pab-miR946d
MIR950	0	0	0	0	0	0	0	0	0	0	0	0	0	0	0	0	1	0	1	pta-miR950a>pta-miR950b
MIR9560	0	0	0	0	1	0	0	0	0	0	0	0	0	0	0	0	0	0	1	bra-miR9560b-3p
MIR9674	0	0	1	0	0	0	0	0	0	0	0	0	0	0	0	0	0	0	1	tae-miR9674a-5p
MIR9677	0	0	1	0	0	0	0	0	0	0	0	0	0	0	0	0	1	0	1	ata-miR9677-5p
MIR9776	0	0	0	0	1	0	0	0	0	0	0	0	0	0	0	0	0	0	1	ata-miR9776-5p
MIR9863	0	0	0	0	0	0	1	0	0	0	0	0	0	0	0	0	0	0	1	ata-miR9863a-3p>ata-miR9863b-3p
mir-9	0	0	0	0	0	0	0	0	0	0	1	1	0	0	0	0	0	0	1	pab-miR11418

## Sheet: Table S6
Supplementary Table 6. The differentially expressed miRNAs identified in three growth periods of patchouli roots under continuous cropping and noncontinuous cropping.
Comparison Group	miRNA_id	BaseMean	BaseMean_control_FP	BaseMean_case_SP	FoldChange	log2FoldChange	pValue	qValue	Regulation	Expression_FP_Root1	Expression_FP_Root2	Expression_FP_Root3	Expression_SP_Root1	Expression_SP_Root2	Expression_SP_Root3	Sequence (5'-3')	Length
SP_S2-vs-FP_S2	aly-miR172e-3p	6.61263	0	13.2253	Inf	Inf	0.0413891	1	Up	0	0	0	0.230425	1.00687	0.0739764	GAATCTTGATGATGCTGCAT	20
	aqc-miR172b>ata-miR172c-3p>ath-miR172e-3p>bdi-miR172b>bna-miR172b>bna-miR172c>bra-miR172d-3p>cme-miR172d>gma-miR172i-3p>gma-miR172l>lus-miR172g>mdm-miR172i>mdm-miR172j>mdm-miR172k>nta-miR172j>osa-miR172b>ppe-miR172c>ptc-miR172d>ptc-miR172e>tcc-miR172c>zma-miR172e	12.2361	23.7514	0.720876	0.0303509	-5.04212	4.45e-05	0.0352923	Down	1.07754	0.947071	0.407179	0	0.0694396	0	GGAATCTTGATGATGCTGCAT	21
	ata-miR164a-5p>bdi-miR164c-5p>cme-miR164a>osa-miR164d>sbi-miR164b>zma-miR164f-5p	4077.78	584.987	7570.57	12.9414	3.69393	0.0402529	1	Up	5.75811	25.3888	28.6722	378.852	362.579	48.5285	TGGAGAAGCAGGGCACGTGCT	21
	atr-miR171b>gma-miR171c-3p>gma-miR171o-3p>gma-miR171q>mdm-miR171m>mdm-miR171n>zma-miR171f-3p	1.6496	0	3.2992	Inf	Inf	0.0197594	1	Up	0	0	0	0.164589	0.0694396	0.110965	TTGAGCCGTGCCAATATCACA	21
	bdi-miR5174e-3p.2	7.02111	11.6982	2.34397	0.200369	-2.31927	0.0275228	1	Down	0.707136	0.291406	0.271452	0.0987536	0.0694396	0.0739764	TTTATGGAACGGAGGGAGTAG	21
	cpa-miR319>mes-miR319f	38.7958	0	77.5916	Inf	Inf	0.00102585	0.271167	Up	0	0	0	5.99105	2.32623	0.110965	ATTGGACTGAAGGGAGCTCC	20
	csi-miR166a-3p>ctr-miR166>hbr-miR166b>lus-miR166i>lus-miR166k	12563.6	369.524	24757.8	66.9991	6.06607	0.00313848	0.430878	Up	11.5499	15.3353	10.892	7.60403	1101.56	1288.6	TCGGACCAGGCTTCATTCCCCC	22
	csi-miR172a-3p>gma-miR172f>lja-miR172b>lja-miR172c>mdm-miR172a>mdm-miR172b>mdm-miR172c>mtr-miR172d-3p>sbi-miR172c>sbi-miR172a>sbi-miR172d>zma-miR172a>zma-miR172d-3p>zma-miR172b-3p>zma-miR172c-3p	7.65842	0.573067	14.7438	25.7278	4.68526	0.000333682	0.132305	Up	0.0673463	0	0	0.493768	0.381918	0.6288	AGAATCTTGATGATGCTGCA	20
	csi-miR390b-5p>gma-miR390e	2.15522	4.31044	0	0	#NAME?	0.0389575	1	Down	0.303058	0.145703	0	0	0	0	AGCTCAGGAGGGATAGCGCC	20
	fve-miR167d	130.961	8.60222	253.32	29.4482	4.88011	0.00799704	0.603416	Up	0.909175	0.0728516	0	16.7552	10.3118	0	TGAAGCTGCCAGCATGATCTCA	22
	gma-miR166m	8.41686	16.8337	0	0	#NAME?	0.0061467	0.603416	Down	0.808156	0.837794	0	0	0	0	CGGACCAGGCTTCATTCCCC	20
	gma-miR168b	7.42062	2.12417	12.7171	5.98683	2.58179	0.0397594	1	Up	0.101019	0.0364258	0.101795	0.0987536	0.555517	0.591811	TCGCTTGGTGCAGGTCGGG	19
	hbr-miR166a>mes-miR166j>pde-miR166a>pde-miR166b>vvi-miR166a>vvi-miR166b	205.293	0	410.586	Inf	Inf	0.00326011	0.430878	Up	0	0	0	0	32.22	7.39764	TCGGACCAGGCTTCATTCC	19
	lja-miR166-3p	5256.39	10502	10.8297	0.00103121	-9.92145	0.0347291	1	Down	0.404078	852.364	45.095	0.263343	0.381918	0.443858	ATTTCGGACCAGGCTTCATTCCCC	24
	mes-miR394c>vvi-miR394a>vvi-miR394c	221.743	424.785	18.7006	0.0440237	-4.50558	0.0274208	1	Down	0.202039	24.0046	16.864	0.362097	0.763836	0.739764	TTGGCATTCTGTCCACCTCCAT	22
	novel17_star	5.41801	0.573067	10.263	17.9088	4.1626	0.00206373	0.409134	Up	0.0673463	0	0	0.329179	0.381918	0.332894	CTGAGTTATTGTACCTTAAAT	21
	novel30_star>novel31_star	12.7258	20.242	5.20966	0.257369	-1.95809	0.038989	1	Down	0.841829	0.400684	1.01795	0.296261	0.0694396	0.184941	GGGGTAACATGAGAACATATA	21
	novel66_star>novel88_star	3.53033	6.31973	0.740935	0.117242	-3.09244	0.0386648	1	Down	0.235712	0.0364258	0.475042	0	0.0347198	0.0369882	AGCCGAACCAATATCACTCT	20
	novel99_mature	12.1321	21.0861	3.17804	0.150717	-2.73008	0.00507017	0.574377	Down	0.63979	0.546387	1.11974	0.0658357	0.104159	0.147953	CAGGTGGTGGAACTGGTAGAC	21
	osa-miR171e-5p>zma-miR171d-5p>zma-miR171e-5p	6.56805	0.850288	12.2858	14.449	3.8529	0.0181164	1	Up	0.0673463	0	0.0339315	0.329179	0.173599	0.739764	TGTTGGCTCGGCTCACTCAGA	21
	osa-miR395b>osa-miR395d>osa-miR395e>osa-miR395g>osa-miR395h>osa-miR395i>osa-miR395j>osa-miR395k>osa-miR395l>osa-miR395s>osa-miR395m>osa-miR395n>osa-miR395p>osa-miR395q>osa-miR395r>osa-miR395y>sbi-miR395b>sbi-miR395a>sbi-miR395d>sbi-miR395e>sbi-miR395c>sbi-miR395g>sbi-miR395h>sbi-miR395i>sbi-miR395j>tae-miR395a>zma-miR395b-3p>zma-miR395a-3p>zma-miR395d-3p>zma-miR395e-3p>zma-miR395f-3p>zma-miR395g-…	10.9688	21.5771	0.360438	0.0167047	-5.90361	0.00837021	0.603416	Down	1.11121	1.01992	0	0	0.0347198	0	GTGAAGTGTTTGGGGGAACTC	21
	osa-miR397b	9.23924	16.4669	2.01157	0.122158	-3.03318	0.00718894	0.603416	Down	0.538771	0.509961	0.712562	0.230425	0	0	TTATTGAGTGCAGCGTTGATG	21
	peu-miR2916	11.2258	18.1112	4.3404	0.239653	-2.06098	0.0440885	1	Down	0.538771	0.764942	0.542905	0.164589	0.243039	0.0369882	TGGGGACTCGAAGACGATCATAT	23
	sly-miR395a>sly-miR395b	21.5258	9.78614	33.2655	3.39924	1.76521	0.0488642	1	Up	0	0.473536	0.508973	1.05337	1.80543	0.517835	CTGAAGTGTTTGGGGGAACTCC	22
SP_S3-vs-FP_S3	aau-miR319>aly-miR319a-3p>aly-miR319b-3p>amg-miR319>aof-miR319a>aqc-miR319>ath-miR319a>ath-miR319b>bra-miR319-3p>cca-miR319>gma-miR319h>gma-miR319j>gma-miR319k>gma-miR319m>hbr-miR319>lus-miR319a>mdm-miR319a>mdm-miR319b-3p>mes-miR319a>mes-miR319b>mes-miR319c>mes-miR319d>mes-miR319e>mtr-miR319d-3p>nta-miR319a>nta-miR319b>rco-miR319a>rco-miR319b>rco-miR319c>sly-miR319b>stu-miR319a-3p>tae-miR319>vun-…	1896.58	3605.74	187.429	0.0519809	-4.26588	0.0105943	0.477332	Down	178.63	9.96341	212.825	3.65762	5.09255	9.28556	TTGGACTGAAGGGAGCTCCCT	21
	aly-miR157a-3p>cas-miR157a	1.94357	0	3.88714	Inf	Inf	0.0176192	0.621268	Up	0	0	0	0.169334	0.152471	0.0315835	GCTCTCTAGCCTTCTGTCATCA	22
	aly-miR158b-3p	7.02051	0.33226	13.7088	41.2591	5.36664	0.00419632	0.31233	Up	0.0358695	0	0	0.64347	0.0914829	0.505337	TCCCAAATGTAGACAAAGC	19
	aly-miR161-5p.1	5.38432	0.324879	10.4438	32.1466	5.0066	0.004728	0.31233	Up	0	0.0347157	0	0.372535	0.0609886	0.53692	TTGAAAGTGACTACATCGGGG	21
	aly-miR166a-3p>aly-miR166b-3p>aly-miR166c-3p>aly-miR166d-3p>aly-miR166e-3p>aly-miR166f-3p>aly-miR166g-3p>aly-miR166h-3p>aof-miR166d>aqc-miR166e>aqc-miR166b>ata-miR166a-3p>ata-miR166e-3p>ata-miR166b-3p>ata-miR166d-3p>ath-miR166a-3p>ath-miR166b-3p>ath-miR166c>ath-miR166d>ath-miR166e-3p>ath-miR166f>ath-miR166g>atr-miR166a>atr-miR166c>atr-miR166d>bdi-miR166a-3p>bdi-miR166d-3p>bdi-miR166b-3p>bdi-miR16…	6694.97	2.99034	13386.9	4476.73	12.1282	5.14e-07	0.000417006	Up	0.322825	0	0	515.148	0	721.337	TCGGACCAGGCTTCATTCCCC	21
	aly-miR167d-5p>ath-miR167d>cca-miR167>eun-miR167b-5p>nta-miR167a>nta-miR167b>nta-miR167c>pab-miR167b>rco-miR167c	586.682	1169.15	4.21407	0.00360439	-8.11603	0.0454138	1	Down	117.975	8.1582	0	0.270935	0	0.0947506	TGAAGCTGCCAGCATGATCTGG	22
	aly-miR398b-3p>ath-miR398b-3p>ath-miR398c-3p>bra-miR398-3p	7.8062	1.63916	13.9732	8.52466	3.09164	0.0164846	0.607683	Up	0.0717389	0.104147	0	0.406402	0.121977	0.789589	TGTGTTCTCAGGTCACCCCTG	21
	aly-miR403a-3p>aly-miR403b-3p>ath-miR403-3p>bna-miR403>bra-miR403-3p>csi-miR403a-3p>csi-miR403b-3p>har-miR403a>hpe-miR403a>htu-miR403a>htu-miR403b>htu-miR403c>htu-miR403d>htu-miR403e>mdm-miR403a>mdm-miR403b>mes-miR403a>mes-miR403b>ppe-miR403>ptc-miR403a>ptc-miR403b>ptc-miR403c-3p>ptc-miR403d>rco-miR403a>rco-miR403b>tcc-miR403a>tcc-miR403b>vvi-miR403a>vvi-miR403b>vvi-miR403c>vvi-miR403d>vvi-miR403…	734.91	1440.46	29.3641	0.0203852	-5.61633	0.00068834	0.111649	Down	69.4433	38.8469	49.6781	0.372535	2.04312	0.44217	TTAGATTCACGCACAAACTCG	21
	ama-miR156	369.757	731.187	8.32811	0.0113899	-6.45611	0.00375977	0.31233	Down	51.7596	0.104147	28.7259	0.101601	0.42692	0.284252	CTGACAGAAGAGAGTGAGCAC	21
	ath-miR157a-3p>ath-miR157b-3p	2.22567	0	4.45134	Inf	Inf	0.0100859	0.477332	Up	0	0	0	0.135467	0.0304943	0.252668	GCTCTCTAGCCTTCTGTCATC	21
	ath-miR161.1	5.49902	0.649757	10.3483	15.9264	3.99335	0.0124321	0.530656	Up	0	0.0694315	0	0.338668	0.0609886	0.568504	TGAAAGTGACTACATCGGGGT	21
	ath-miR163	2.7222	0	5.4444	Inf	Inf	0.00539163	0.31233	Up	0	0	0	0.270935	0.0914829	0.126334	TTGAAGAGGACTTGGAACTTCGAT	24
	ath-miR398b-5p>ath-miR398c-5p	8.65941	1.95665	15.3622	7.85124	2.97292	0.00592973	0.320601	Up	0.0358695	0.173579	0	0.474136	0.335437	0.631671	AGGGTTGATATGAGAACACAC	21
	atr-miR319a>atr-miR319c>cme-miR319b>cme-miR319a>ctr-miR319>gma-miR319a>gma-miR319b>gma-miR319e>lus-miR319b>mtr-miR319a-3p>mtr-miR319b-3p>pab-miR319a>pab-miR319b>pab-miR319c>pab-miR319f>pab-miR319g>pab-miR319i>pab-miR319k>pab-miR319l>pab-miR319m>pab-miR319n>ppe-miR319a>ptc-miR319a>ptc-miR319b>ptc-miR319c>ptc-miR319d	579.744	0	1159.49	Inf	Inf	0.0157885	0.607683	Up	0	0	0	0.0677337	114.476	1.16859	TTGGACTGAAGGGAGCTCCC	20
	bdi-miR159a-3p	54.0612	100.144	7.97852	0.0796706	-3.64981	0.000890707	0.120394	Down	3.73042	3.36743	3.90351	0.508003	0.152471	0.0315835	CTTGGATTGAAGGGAGCTCT	20
	bna-miR156a>hvu-miR156a>hvu-miR156b>rco-miR156a>rco-miR156b>rco-miR156c>rco-miR156d>ssl-miR156>ssp-miR156>tae-miR156	666.779	40.9945	1292.56	31.5302	4.97866	0.0161045	0.607683	Up	2.5826	0.48602	1.43462	71.9332	40.8928	1.38968	TGACAGAAGAGAGTGAGCACA	21
	cas-miR403	990.865	82.4593	1899.27	23.0328	4.52562	0.00476181	0.31233	Up	2.00869	3.67987	3.3697	68.3771	54.7372	52.8393	TTAGATTCACGCACAAACTCGT	22
	cme-miR159b>osa-miR159e	265.741	528.469	3.01386	0.00570299	-7.45406	0.000203058	0.0626031	Down	0.358695	26.4881	31.7619	0.0677337	0	0.221085	ATTGGATTGAAGGGAGCTCCT	21
	csi-miR156e-5p	2.01613	4.03227	0	0	#NAME?	0.0293809	0.953116	Down	0.215217	0	0.233544	0	0	0	GTGACAGAAGATAGAGAGCGC	21
	gma-miR159a-5p	14.399	27.1585	1.63947	0.0603665	-4.05011	0.00763812	0.387157	Down	1.21956	0.138863	1.66817	0.0338668	0.0914829	0.0315835	GAGCTCCTTGAAGTCCAATTG	21
	gma-miR159e-5p	13.7519	3.19628	24.3076	7.60496	2.92694	0.0467309	1	Up	0.0717389	0.208294	0.0667267	0.948271	0.0304943	1.26334	GAGCTCCTTGAAGTCCAATT	20
	gma-miR164b>gma-miR164c>gma-miR164d	142.066	2.97971	281.153	94.3559	6.56004	0.000663529	0.111649	Up	0	0.0694315	0.266907	0.0338668	14.0884	14.0547	TGGAGAAGCAGGGCACGTGC	20
	gma-miR172k	12.5998	24.886	0.313654	0.0126036	-6.31001	0.00511856	0.31233	Down	1.11195	1.52749	0.0333634	0	0	0.0315835	TGAATCTTGATGATGCTGCAT	21
	gma-miR319g>gma-miR319l	508.462	19.1736	997.75	52.0377	5.70149	0.00217545	0.252042	Up	0.358695	0.72903	1.03426	36.6439	0.396426	55.4923	TTGGACTGAAGGGAGCTCCTTC	22
	hbr-miR166a>mes-miR166j>pde-miR166a>pde-miR166b>vvi-miR166a>vvi-miR166b	102.667	0	205.335	Inf	Inf	0.0421258	1	Up	0	0	0	0	20.4922	0	TCGGACCAGGCTTCATTCC	19
	mes-miR160e>vvi-miR160a>vvi-miR160b	1.73063	3.46127	0	0	#NAME?	0.0261947	0.885164	Down	0.107608	0.138863	0.133453	0	0	0	TGCCTGGCTCCCTGAATGCCATC	23
	novel17_mature	433.072	29.3146	836.829	28.5465	4.83524	0.00310708	0.31233	Up	0.860867	1.28448	1.06763	34.9844	1.73817	39.9532	TTGAGGTACAATAACTTGGGT	21
	pta-miR319	54.6132	104.338	4.88893	0.0468568	-4.4156	0.0445078	1	Down	3.4076	7.77632	0	0	0.487909	0	TTGGACTGAAGGGAGCTCC	19
	vca-miR396-5p>vvi-miR396b	325.918	4.22342	647.613	153.338	7.26057	0.000231577	0.0626031	Up	0	0.451304	0	0	33.3912	31.5204	TTCCACAGCTTTCTTGAACT	20
SP_S4-vs-FP_S4	aly-miR168a-5p>aly-miR168b-5p>aof-miR168a>ath-miR168a-5p>ath-miR168b-5p>atr-miR168>bna-miR168a>bra-miR168a-5p>cca-miR168a>ccl-miR168>crt-miR168>csi-miR168-5p>fve-miR168-5p>gma-miR168a>lus-miR168a>lus-miR168b>mdm-miR168a>mdm-miR168b>mes-miR168a>mtr-miR168b>mtr-miR168c-5p>nta-miR168d>nta-miR168e>pab-miR168a>ppe-miR168>ptc-miR168a-5p>ptc-miR168b-5p>rco-miR168>tcc-miR168>vca-miR168a-5p>vca-miR168b-5p…	2020.56	157.692	3883.43	24.6267	4.62215	0.00124989	0.150403	Up	2.10576	1.26061	15.6379	109.95	134.24	140.446	TCGCTTGGTGCAGGTCGGGAA	21
	aly-miR319c-3p>aly-miR319d-3p>ath-miR319c>mes-miR319g>pvu-miR319c>rco-miR319d>sly-miR319c-3p	254.005	471.92	36.091	0.076477	-3.70883	0.0322195	1	Down	0	33.6287	23.3036	3.4467	0.13625	0.164649	TTGGACTGAAGGGAGCTCCTT	21
	aly-miR395d-3p>aly-miR395e-3p>aly-miR395g-3p>ath-miR395a>ath-miR395d>ath-miR395e>atr-miR395>bna-miR395a>bna-miR395b>bna-miR395c>bra-miR395d-3p>bra-miR395b-3p>bra-miR395c-3p>bra-miR395a-3p>cas-miR395a>cas-miR395d-3p>cme-miR395a>cme-miR395e>cme-miR395d>cme-miR395f>csi-miR395a>csi-miR395b-3p>csi-miR395c-3p>gma-miR395a>gma-miR395b>gma-miR395c>lus-miR395a>lus-miR395b>lus-miR395c>lus-miR395d>mdm-miR395…	15.3224	2.77948	27.8652	10.0253	3.32558	0.0068283	0.493003	Up	0.35636	0	0	0.310203	1.26031	1.15254	CTGAAGTGTTTGGGGGAACTC	21
	aly-miR399b-3p>aly-miR399c-3p>aof-miR399a>ath-miR399b>ath-miR399c-3p>csi-miR399d-3p>fve-miR399a>gma-miR399a>gma-miR399b>gma-miR399c>gma-miR399h>mdm-miR399i>mdm-miR399j>mes-miR399f>mtr-miR399l>mtr-miR399p>osa-miR399d>pab-miR399d>pvu-miR399a>rco-miR399a>sbi-miR399d>sbi-miR399i>tcc-miR399i>vun-miR399a>vvi-miR399b>vvi-miR399c>zma-miR399e-3p>zma-miR399i-3p>zma-miR399j-3p	6.88389	1.56866	12.1991	7.77679	2.95918	0.0191831	1	Up	0.161982	0.0370768	0	0.44807	0.340624	0.428087	TGCCAAAGGAGAGTTGCCCTG	21
	aof-miR167c>atr-miR167>cme-miR167d>cme-miR167f>csi-miR167c-5p>csi-miR167a-5p>dpr-miR167c>gma-miR167c>gma-miR167j>gso-miR167a>lja-miR167>lus-miR167f>lus-miR167g>lus-miR167i>mes-miR167a>mtr-miR167b-5p>osa-miR167d-5p>osa-miR167e-5p>osa-miR167f>osa-miR167g>osa-miR167h-5p>osa-miR167i-5p>osa-miR167j>ptc-miR167e>sbi-miR167d>sbi-miR167f>sbi-miR167g>sbi-miR167e>sbi-miR167c>sbi-miR167h>sof-miR167a>sof-miR1…	1022.94	3.29505	2042.59	619.895	9.27588	4.17e-05	0.0300851	Up	0.226775	0.185384	0	115.085	0	92.862	TGAAGCTGCCAGCATGATCTG	21
	ata-miR167f-5p>tae-miR167c-5p	777.491	1546.78	8.19768	0.00529982	-7.55984	0.000182388	0.0658419	Down	104.349	0.0741536	87.4906	0.206802	0.306561	0.296368	TGAAGCTGCCAGCATGATCTGC	22
	ata-miR395e-3p>ata-miR395a-3p>ata-miR395d-3p>ata-miR395f-3p>ata-miR395c-3p>bdi-miR395a>bdi-miR395b>bdi-miR395c-3p>bdi-miR395m>bdi-miR395e-3p>bdi-miR395f-3p>bdi-miR395g-3p>bdi-miR395h-3p>bdi-miR395j-3p>bdi-miR395k-3p>bdi-miR395l-3p>bdi-miR395n-3p>bdi-miR395o-3p>bdi-miR395q>cpa-miR395a>cpa-miR395b>cpa-miR395c>cpa-miR395d>cpa-miR395e>tae-miR395b	6.2677	11.8755	0.659876	0.055566	-4.16965	0.0183111	1	Down	0.0971891	0.519075	0.817669	0.0689339	0	0	TGAAGTGTTTGGGGGAACTC	20
	cpa-miR319>mes-miR319f	18.3423	35.3649	1.31975	0.0373181	-4.74398	0.0126841	0.832541	Down	0	2.11338	2.14638	0.137868	0	0	ATTGGACTGAAGGGAGCTCC	20
	csi-miR156j-5p>mtr-miR4414a-5p	21.7613	36.7341	6.7886	0.184804	-2.43593	0.0220974	1	Down	2.23535	1.40892	0.919878	0.241269	0.204374	0.230509	AGCTGCTGACTCGTTGGTTCA	21
	gma-miR395d>gma-miR395e>gma-miR395f>gma-miR395g	13.0576	23.6692	2.44604	0.103343	-3.27449	0.0032019	0.256863	Down	1.06908	0.92692	0.919878	0.0689339	0.170312	0	TGAAGTGTTTGGGGGAACTTT	21
	gma-miR408d	116.452	211.654	21.2501	0.1004	-3.31616	0.0305209	1	Down	17.4292	8.1569	1.02209	1.58548	0.57906	0	TGCACTGCCTCTTCCCTGGC	20
	novel5_mature	217.79	377.718	57.8624	0.15319	-2.70661	0.046396	1	Down	23.3578	8.7872	14.718	2.13695	1.49874	2.14044	TATTTCTGAAGGTTCTGTGATGATA	25
	novel68_mature	18.8148	34.928	2.70154	0.0773461	-3.69253	0.00152904	0.15771	Down	1.39304	1.77969	1.1243	0.137868	0.0681248	0.0658596	TCCAACGATGCAGGAGCTGTCT	22
	novel81_mature>novel92_mature	11.354	21.3536	1.35449	0.0634317	-3.97865	0.00070708	0.136815	Down	1.10148	1.18646	0.35773	0.034467	0.0340624	0.0658596	GAGCTTCCTTCAGTCCAGTC	20
	osa-miR159d	135.311	267.323	3.29938	0.0123423	-6.34024	0.000947474	0.136815	Down	15.5503	17.6856	0.0511043	0.34467	0	0	ATTGGATTGAAGGGAGCTCCG	21
	osa-miR159f	1605.89	84.2026	3127.59	37.1436	5.21504	0.000921286	0.136815	Up	4.37351	2.18753	3.83282	98.6444	75.925	136.889	CTTGGATTGAAGGGAGCTCTA	21
	osa-miR171e-5p>zma-miR171d-5p>zma-miR171e-5p	38.1815	71.2118	5.15131	0.0723379	-3.7891	0.00259812	0.23448	Down	3.30443	3.33691	2.14638	0.172335	0.238437	0.0987894	TGTTGGCTCGGCTCACTCAGA	21

## Sheet: Table S7
Supplementary Table 7. The target genes of differentially expressed miRNAs.
Comparison Group	Differentially Expressed miRNA	Number of Target Genes	Target Genes
SP_S2-vs-FP_S2	aly-miR172e-3p	308	MSTRG.100619.1	MSTRG.19640.1	MSTRG.69667.1	MSTRG.82645.1	MSTRG.102387.1	MSTRG.13519.1	MSTRG.13519.2	MSTRG.26802.1	MSTRG.75023.1	MSTRG.13519.3	MSTRG.124111.3	MSTRG.41326.5	MSTRG.39967.2	MSTRG.115090.2	MSTRG.8954.3	MSTRG.82760.2	MSTRG.41326.1	MSTRG.32488.1	MSTRG.14418.1	MSTRG.115090.3	MSTRG.83107.2	MSTRG.105553.2	MSTRG.81444.1	MSTRG.39967.3	MSTRG.41738.1	MSTRG.82760.1	MSTRG.83107.1	MSTRG.8954.2	MSTRG.104926.1	MSTRG.124111.1	MSTRG.124086.1	MSTRG.104926.6	MSTRG.41738.2	MSTRG.8954.1	MSTRG.41326.6	MSTRG.105553.1	MSTRG.38549.4	MSTRG.7812.2	MSTRG.82760.3	MSTRG.38549.3	MSTRG.39967.1	MSTRG.39967.4	MSTRG.7812.1	MSTRG.104926.5	MSTRG.124111.2	MSTRG.1033.1	MSTRG.41326.2
	bdi-miR5174e-3p.2	109	MSTRG.19337.1	MSTRG.27952.1	MSTRG.27069.1	MSTRG.108200.3	MSTRG.108200.2	MSTRG.108200.1	MSTRG.122948.1	MSTRG.28621.1	MSTRG.81926.1	MSTRG.28689.1	MSTRG.73894.4	MSTRG.73894.3	MSTRG.22924.1	MSTRG.73894.1	MSTRG.79802.1	MSTRG.29387.3	MSTRG.29387.2	MSTRG.29387.1	MSTRG.104272.1	MSTRG.464.1	MSTRG.72212.14	MSTRG.118675.1	MSTRG.34812.3	MSTRG.34812.2	MSTRG.34812.1	MSTRG.94311.1	MSTRG.4554.1	MSTRG.9424.1	MSTRG.23263.1	MSTRG.79397.2	MSTRG.18067.3	MSTRG.18067.2	MSTRG.18067.1	MSTRG.62268.1	MSTRG.83488.2	MSTRG.116931.1	MSTRG.24859.2	MSTRG.61481.1	MSTRG.34369.1	MSTRG.34369.2	MSTRG.17815.3	MSTRG.17815.2	MSTRG.17815.1	MSTRG.63662.1	MSTRG.18020.1	MSTRG.56638.3	MSTRG.56638.2
	osa-miR397b	64	MSTRG.98381.1	MSTRG.68284.1	MSTRG.53502.1	MSTRG.49362.1	MSTRG.52699.2	MSTRG.52699.1	MSTRG.29988.1	MSTRG.80393.2	MSTRG.31952.1	MSTRG.55454.2	MSTRG.16353.1	MSTRG.31952.2	MSTRG.80393.1	MSTRG.26905.1	MSTRG.105430.1	MSTRG.36945.1	MSTRG.107009.1	MSTRG.68285.2	MSTRG.68285.1	MSTRG.85957.1	MSTRG.16360.1	MSTRG.55460.1	MSTRG.80397.1	MSTRG.32542.1	MSTRG.31959.1	MSTRG.19372.1	MSTRG.32542.2	MSTRG.55454.1	MSTRG.55454.3	MSTRG.72829.5	MSTRG.72829.4	MSTRG.72829.3	MSTRG.72829.1	MSTRG.72829.2	MSTRG.913.1	MSTRG.57490.1	MSTRG.56556.1	MSTRG.56556.2	MSTRG.26904.1	MSTRG.107012.1	MSTRG.105432.1	MSTRG.36943.1	MSTRG.80736.1	MSTRG.121305.1	MSTRG.80735.2	MSTRG.80735.1	MSTRG.46784.1
	gma-miR168b	62	MSTRG.30891.1	MSTRG.70762.2	MSTRG.63452.1	MSTRG.30891.5	MSTRG.84248.1	MSTRG.30891.6	MSTRG.70762.1	MSTRG.63452.2	MSTRG.115262.4	MSTRG.115262.2	MSTRG.115262.5	MSTRG.115262.1	MSTRG.115262.7	MSTRG.115262.6	MSTRG.115262.3	MSTRG.115262.8	MSTRG.28893.1	MSTRG.79297.1	MSTRG.79297.2	MSTRG.67793.1	MSTRG.100391.1	MSTRG.59672.4	MSTRG.59672.10	MSTRG.59672.8	MSTRG.59672.5	MSTRG.59672.7	MSTRG.59672.3	MSTRG.59672.13	MSTRG.59672.9	MSTRG.89501.5	MSTRG.89501.14	MSTRG.89501.13	MSTRG.89501.8	MSTRG.89501.9	MSTRG.89501.1	MSTRG.59672.11	MSTRG.89501.4	MSTRG.89501.11	MSTRG.89501.6	MSTRG.89501.15	MSTRG.89501.2	MSTRG.59672.6	MSTRG.89501.18	MSTRG.89501.16	MSTRG.89501.3	MSTRG.59672.12	MSTRG.89501.12
	gma-miR166m	62	MSTRG.52066.3	MSTRG.4572.1	MSTRG.111526.2	MSTRG.111526.8	MSTRG.98200.2	MSTRG.111526.7	MSTRG.4572.2	MSTRG.3216.1	MSTRG.111526.1	MSTRG.98200.3	MSTRG.51175.1	MSTRG.78601.4	MSTRG.111526.10	MSTRG.124028.2	MSTRG.111526.4	MSTRG.100662.3	MSTRG.93590.2	MSTRG.23825.1	MSTRG.111526.6	MSTRG.100662.1	MSTRG.78601.1	MSTRG.98200.4	MSTRG.93590.1	MSTRG.100662.2	MSTRG.93590.4	MSTRG.111526.5	MSTRG.93590.3	MSTRG.124028.1	MSTRG.78601.2	MSTRG.98200.5	MSTRG.98200.1	MSTRG.78601.5	MSTRG.118382.1	MSTRG.51175.2	MSTRG.111526.3	MSTRG.78601.3	MSTRG.78601.6	MSTRG.52066.1	MSTRG.23825.2	MSTRG.111526.9	MSTRG.51524.2	MSTRG.105625.2	MSTRG.7963.1	MSTRG.51524.1	MSTRG.68161.2	MSTRG.124951.1	MSTRG.123447.1
	novel99_mature	58	MSTRG.64095.1	MSTRG.121484.4	MSTRG.95462.7	MSTRG.95462.4	MSTRG.95462.3	MSTRG.95462.1	MSTRG.95462.2	MSTRG.95462.6	MSTRG.95462.5	MSTRG.108888.2	MSTRG.65220.2	MSTRG.35623.2	MSTRG.35623.1	MSTRG.108888.1	MSTRG.65220.1	MSTRG.17463.2	MSTRG.17463.1	MSTRG.72313.1	MSTRG.15282.1	MSTRG.56567.1	MSTRG.904.2	MSTRG.72838.1	MSTRG.904.1	MSTRG.78930.1	MSTRG.39864.1	MSTRG.43213.19	MSTRG.26681.3	MSTRG.43213.22	MSTRG.43213.20	MSTRG.43213.15	MSTRG.43213.17	MSTRG.43213.16	MSTRG.26681.2	MSTRG.26681.1	MSTRG.21249.1	MSTRG.121484.5	MSTRG.121484.3	MSTRG.121484.1	MSTRG.60338.4	MSTRG.121484.2	MSTRG.60338.3	MSTRG.60338.2	MSTRG.60338.1	MSTRG.15993.1	MSTRG.15610.3	MSTRG.15610.4	MSTRG.15610.7
	novel17_star	36	MSTRG.74636.4	MSTRG.19369.1	MSTRG.565.4	MSTRG.113830.4	MSTRG.74636.5	MSTRG.74636.2	MSTRG.565.1	MSTRG.113830.3	MSTRG.113830.2	MSTRG.74636.1	MSTRG.29638.3	MSTRG.29638.1	MSTRG.51426.1	MSTRG.83011.1	MSTRG.59056.1	MSTRG.1115.1	MSTRG.44143.1	MSTRG.33955.2	MSTRG.45166.5	MSTRG.45166.4	MSTRG.45166.3	MSTRG.44143.3	MSTRG.44143.2	MSTRG.45166.1	MSTRG.33955.1	MSTRG.45166.2	MSTRG.106097.1	MSTRG.106097.2	MSTRG.35331.2	MSTRG.35331.3	MSTRG.28322.1	MSTRG.91474.2	MSTRG.91474.3	MSTRG.35331.1	MSTRG.91474.1	MSTRG.98550.1
	fve-miR167d	14	MSTRG.59483.1	MSTRG.78415.1	MSTRG.68496.1	MSTRG.110414.1	MSTRG.25998.1	MSTRG.66163.2	MSTRG.103818.1	MSTRG.20512.1	MSTRG.120560.1	MSTRG.18175.4	MSTRG.18175.3	MSTRG.18175.2	MSTRG.18175.1	MSTRG.40352.1
	peu-miR2916	1	MSTRG.71276.1
SP_S3-vs-FP_S3	gma-miR172k	200	MSTRG.100619.1	MSTRG.19640.1	MSTRG.69667.1	MSTRG.82645.1	MSTRG.13519.2	MSTRG.13519.1	MSTRG.102387.1	MSTRG.75023.1	MSTRG.13519.3	MSTRG.26802.1	MSTRG.1033.1	MSTRG.81591.1	MSTRG.56436.1	MSTRG.32488.1	MSTRG.124086.2	MSTRG.8954.2	MSTRG.39967.4	MSTRG.39967.3	MSTRG.39967.2	MSTRG.83107.1	MSTRG.124111.1	MSTRG.124086.1	MSTRG.83107.2	MSTRG.7812.2	MSTRG.82760.3	MSTRG.39967.1	MSTRG.7812.5	MSTRG.13859.2	MSTRG.124111.2	MSTRG.7812.1	MSTRG.124111.3	MSTRG.7812.3	MSTRG.13859.1	MSTRG.82760.2	MSTRG.75145.2	MSTRG.82760.1	MSTRG.7812.4	MSTRG.41326.4	MSTRG.41326.5	MSTRG.104926.6	MSTRG.104926.5	MSTRG.104926.4	MSTRG.104926.1	MSTRG.104926.2	MSTRG.41326.6	MSTRG.104926.3	MSTRG.41326.3
	aly-miR158b-3p	134	MSTRG.80102.3	MSTRG.61259.5	MSTRG.80102.4	MSTRG.61259.7	MSTRG.9117.3	MSTRG.9117.1	MSTRG.80102.7	MSTRG.61259.1	MSTRG.61259.3	MSTRG.61259.6	MSTRG.61259.2	MSTRG.80102.1	MSTRG.61259.4	MSTRG.80102.6	MSTRG.80102.5	MSTRG.9117.2	MSTRG.5522.3	MSTRG.103885.4	MSTRG.96660.3	MSTRG.103885.2	MSTRG.96660.2	MSTRG.96660.1	MSTRG.103885.1	MSTRG.96660.4	MSTRG.103885.5	MSTRG.96660.6	MSTRG.97912.2	MSTRG.18249.1	MSTRG.97912.1	MSTRG.18249.3	MSTRG.18249.2	MSTRG.107068.1	MSTRG.97912.3	MSTRG.70713.1	MSTRG.97912.4	MSTRG.97912.5	MSTRG.16309.1	MSTRG.86700.1	MSTRG.44367.1	MSTRG.2343.1	MSTRG.93236.1	MSTRG.86700.2	MSTRG.93236.2	MSTRG.97912.2	MSTRG.97912.4	MSTRG.10650.1	MSTRG.10650.2
	pta-miR319	132	MSTRG.97625.1	MSTRG.97625.3	MSTRG.109626.2	MSTRG.109626.4	MSTRG.97625.2	MSTRG.7730.1	MSTRG.66150.1	MSTRG.109626.1	MSTRG.67462.1	MSTRG.109626.3	MSTRG.30685.1	MSTRG.18162.1	MSTRG.18162.4	MSTRG.18162.2	MSTRG.103833.1	MSTRG.103833.3	MSTRG.18162.6	MSTRG.18162.3	MSTRG.20499.1	MSTRG.20499.7	MSTRG.103833.2	MSTRG.20499.3	MSTRG.20499.2	MSTRG.120567.1	MSTRG.18162.7	MSTRG.20499.4	MSTRG.120567.2	MSTRG.20499.5	MSTRG.20499.6	MSTRG.18162.5	MSTRG.103833.4	MSTRG.124992.1	MSTRG.120567.4	MSTRG.96904.1	MSTRG.79012.1	MSTRG.17209.1	MSTRG.120567.3	MSTRG.18847.1	MSTRG.92097.1	MSTRG.13998.1	MSTRG.55786.1	MSTRG.34207.1	MSTRG.25520.1	MSTRG.53356.2	MSTRG.53356.1	MSTRG.85817.1	MSTRG.85817.2
	gma-miR159e-5p	91	MSTRG.106111.11	MSTRG.45180.4	MSTRG.106111.1	MSTRG.45180.2	MSTRG.106111.5	MSTRG.44129.3	MSTRG.106111.12	MSTRG.106111.10	MSTRG.45180.3	MSTRG.45180.6	MSTRG.44129.2	MSTRG.33968.1	MSTRG.106111.13	MSTRG.106111.6	MSTRG.33968.2	MSTRG.106111.4	MSTRG.106111.3	MSTRG.45180.5	MSTRG.106111.9	MSTRG.45180.1	MSTRG.106111.8	MSTRG.44129.1	MSTRG.33968.3	MSTRG.106111.2	MSTRG.106111.7	MSTRG.109793.1	MSTRG.117095.1	MSTRG.120306.4	MSTRG.95348.1	MSTRG.95348.3	MSTRG.100291.1	MSTRG.120306.1	MSTRG.1903.7	MSTRG.120306.3	MSTRG.120306.2	MSTRG.1903.6	MSTRG.1903.5	MSTRG.95348.2	MSTRG.1903.4	MSTRG.1903.8	MSTRG.95348.6	MSTRG.95348.5	MSTRG.95348.4	MSTRG.1903.2	MSTRG.1903.1	MSTRG.120306.5	MSTRG.116514.1
	bdi-miR159a-3p	86	MSTRG.63425.1	MSTRG.8466.1	MSTRG.65833.1	MSTRG.115438.1	MSTRG.111708.2	MSTRG.33655.1	MSTRG.52676.1	MSTRG.33655.2	MSTRG.97625.2	MSTRG.7730.1	MSTRG.109626.4	MSTRG.30685.1	MSTRG.109626.3	MSTRG.66150.1	MSTRG.67462.1	MSTRG.97625.1	MSTRG.97625.3	MSTRG.109626.2	MSTRG.109626.1	MSTRG.41326.1	MSTRG.41326.5	MSTRG.104926.6	MSTRG.41326.3	MSTRG.105553.2	MSTRG.105553.1	MSTRG.104926.3	MSTRG.41326.4	MSTRG.14439.1	MSTRG.104926.4	MSTRG.110550.1	MSTRG.104926.1	MSTRG.104926.5	MSTRG.104926.2	MSTRG.41326.6	MSTRG.41326.2	MSTRG.60090.1	MSTRG.9677.1	MSTRG.119946.1	MSTRG.120552.12	MSTRG.20505.3	MSTRG.18169.1	MSTRG.120552.4	MSTRG.20505.1	MSTRG.120552.14	MSTRG.103824.2	MSTRG.120552.2	MSTRG.20505.2
	ama-miR156	65	MSTRG.68904.2	MSTRG.30290.1	MSTRG.68904.3	MSTRG.68904.1	MSTRG.37871.1	MSTRG.48823.2	MSTRG.67623.1	MSTRG.48823.1	MSTRG.17635.1	MSTRG.67623.2	MSTRG.86570.1	MSTRG.38722.1	MSTRG.13219.3	MSTRG.67631.1	MSTRG.27462.1	MSTRG.125703.1	MSTRG.47608.1	MSTRG.103808.1	MSTRG.42509.4	MSTRG.13219.2	MSTRG.13219.1	MSTRG.42509.3	MSTRG.10679.1	MSTRG.42509.2	MSTRG.81923.3	MSTRG.74293.1	MSTRG.81923.1	MSTRG.38773.1	MSTRG.28851.3	MSTRG.97856.1	MSTRG.111696.3	MSTRG.42509.1	MSTRG.28851.2	MSTRG.111696.2	MSTRG.28851.1	MSTRG.111696.1	MSTRG.81923.2	MSTRG.56850.2	MSTRG.56281.1	MSTRG.28437.1	MSTRG.118869.1	MSTRG.10791.2	MSTRG.76890.4	MSTRG.58217.2	MSTRG.79979.1	MSTRG.76890.1	MSTRG.76890.3
	csi-miR156e-5p	64	MSTRG.38722.1	MSTRG.103808.1	MSTRG.14457.2	MSTRG.73865.2	MSTRG.94705.2	MSTRG.73865.1	MSTRG.38993.1	MSTRG.14457.1	MSTRG.94705.1	MSTRG.24508.2	MSTRG.117271.3	MSTRG.117271.2	MSTRG.24508.1	MSTRG.88522.2	MSTRG.120820.1	MSTRG.88522.1	MSTRG.117271.1	MSTRG.101935.2	MSTRG.101935.1	MSTRG.78834.1	MSTRG.64136.2	MSTRG.64136.1	MSTRG.85309.5	MSTRG.85309.2	MSTRG.99379.3	MSTRG.99379.2	MSTRG.68904.2	MSTRG.30290.1	MSTRG.68904.3	MSTRG.68904.1	MSTRG.37871.1	MSTRG.48823.2	MSTRG.67623.1	MSTRG.48823.1	MSTRG.67623.2	MSTRG.86570.1	MSTRG.13219.3	MSTRG.67631.1	MSTRG.125703.1	MSTRG.47608.1	MSTRG.13219.2	MSTRG.13219.1	MSTRG.10679.1	MSTRG.81923.3	MSTRG.74293.1	MSTRG.38773.1	MSTRG.81923.1
	gma-miR159a-5p	53	MSTRG.117095.1	MSTRG.106111.13	MSTRG.106111.5	MSTRG.45180.6	MSTRG.106111.6	MSTRG.106111.9	MSTRG.45180.4	MSTRG.106111.11	MSTRG.106111.8	MSTRG.33968.2	MSTRG.45180.3	MSTRG.106111.2	MSTRG.106111.12	MSTRG.106111.10	MSTRG.106111.4	MSTRG.33968.3	MSTRG.106111.7	MSTRG.44129.3	MSTRG.45180.5	MSTRG.44129.2	MSTRG.33968.1	MSTRG.45180.2	MSTRG.106111.1	MSTRG.44129.1	MSTRG.106111.3	MSTRG.45180.1	MSTRG.107450.9	MSTRG.34931.2	MSTRG.123101.2	MSTRG.123101.1	MSTRG.8394.1	MSTRG.34931.1	MSTRG.107450.7	MSTRG.8398.2	MSTRG.107450.4	MSTRG.107450.6	MSTRG.107450.3	MSTRG.107450.5	MSTRG.119803.3	MSTRG.119803.2	MSTRG.119803.1	MSTRG.84977.2	MSTRG.89097.2	MSTRG.84977.4	MSTRG.3345.1	MSTRG.89097.1	MSTRG.84977.3
	cas-miR403	38	MSTRG.108174.1	MSTRG.91384.4	MSTRG.108174.4	MSTRG.108174.7	MSTRG.108174.14	MSTRG.108174.10	MSTRG.108174.12	MSTRG.108174.3	MSTRG.108174.5	MSTRG.100885.1	MSTRG.108174.2	MSTRG.108174.11	MSTRG.110856.6	MSTRG.110856.3	MSTRG.110856.5	MSTRG.110856.2	MSTRG.110856.7	MSTRG.110856.4	MSTRG.110856.8	MSTRG.108174.6	MSTRG.100883.2	MSTRG.53086.3	MSTRG.53086.1	MSTRG.110853.2	MSTRG.110853.1	MSTRG.100883.1	MSTRG.108166.1	MSTRG.100888.1	MSTRG.91384.1	MSTRG.51986.1	MSTRG.33550.1	MSTRG.49491.1	MSTRG.98935.1	MSTRG.33550.3	MSTRG.11730.1	MSTRG.51986.2	MSTRG.49491.2	MSTRG.84160.4
	ath-miR161.1	26	MSTRG.63105.1	MSTRG.71111.1	MSTRG.58204.1	MSTRG.81596.1	MSTRG.19308.1	MSTRG.119924.1	MSTRG.97974.1	MSTRG.89212.2	MSTRG.89212.1	MSTRG.89212.4	MSTRG.89212.3	MSTRG.9705.4	MSTRG.9705.3	MSTRG.60111.2	MSTRG.60111.1	MSTRG.9705.1	MSTRG.67350.1	MSTRG.45001.1	MSTRG.117382.1	MSTRG.61312.3	MSTRG.61312.2	MSTRG.87874.4	MSTRG.87874.3	MSTRG.87874.1	MSTRG.87874.5	MSTRG.87874.2
	novel17_mature	17	MSTRG.74636.4	MSTRG.74636.5	MSTRG.74636.2	MSTRG.74636.1	MSTRG.113830.4	MSTRG.113830.3	MSTRG.113830.2	MSTRG.83035.1	MSTRG.83027.4	MSTRG.83027.3	MSTRG.83027.1	MSTRG.83027.2	MSTRG.41130.2	MSTRG.41130.1	MSTRG.72242.1	MSTRG.119282.1	MSTRG.44323.1
	aly-miR161-5p.1	16	MSTRG.116721.1	MSTRG.67350.1	MSTRG.58204.1	MSTRG.19308.1	MSTRG.81596.1	MSTRG.97974.1	MSTRG.117382.1	MSTRG.61312.3	MSTRG.61312.2	MSTRG.87874.4	MSTRG.87874.3	MSTRG.87874.1	MSTRG.87874.5	MSTRG.87874.2	MSTRG.54704.1	MSTRG.97875.1
SP_S4-vs-FP_S4	gma-miR408d	60	MSTRG.6133.2	MSTRG.6133.1	MSTRG.122761.1	MSTRG.47124.1	MSTRG.30147.1	MSTRG.93987.1	MSTRG.30147.2	MSTRG.81107.1	MSTRG.93986.1	MSTRG.81107.2	MSTRG.38569.2	MSTRG.38569.1	MSTRG.110453.1	MSTRG.31298.4	MSTRG.55920.1	MSTRG.55920.3	MSTRG.31298.1	MSTRG.31298.2	MSTRG.31298.3	MSTRG.31298.5	MSTRG.31298.6	MSTRG.118185.2	MSTRG.118185.1	MSTRG.84079.1	MSTRG.118197.1	MSTRG.84092.1	MSTRG.37932.1	MSTRG.26703.11	MSTRG.26703.14	MSTRG.14868.1	MSTRG.26703.10	MSTRG.26703.13	MSTRG.26703.5	MSTRG.26703.4	MSTRG.26703.18	MSTRG.26703.1	MSTRG.26703.2	MSTRG.26703.3	MSTRG.26703.9	MSTRG.26703.16	MSTRG.26703.12	MSTRG.26703.8	MSTRG.26703.17	MSTRG.26703.6	MSTRG.26703.15	MSTRG.26703.7	MSTRG.37932.2
	osa-miR159f	23	MSTRG.63425.1	MSTRG.65833.1	MSTRG.29446.1	MSTRG.111708.2	MSTRG.115438.1	MSTRG.7730.1	MSTRG.97625.3	MSTRG.97625.2	MSTRG.97625.1	MSTRG.66150.1	MSTRG.57361.3	MSTRG.57361.1	MSTRG.24947.2	MSTRG.95621.1	MSTRG.78466.1	MSTRG.78466.2	MSTRG.24947.1	MSTRG.113683.4	MSTRG.113683.3	MSTRG.113683.2	MSTRG.113683.5	MSTRG.113683.1	MSTRG.8466.1
	osa-miR159d	21	MSTRG.30685.1	MSTRG.67462.1	MSTRG.109626.4	MSTRG.109626.2	MSTRG.109626.1	MSTRG.109626.3	MSTRG.97625.3	MSTRG.97625.2	MSTRG.97625.1	MSTRG.7730.1	MSTRG.66150.1	MSTRG.109833.2	MSTRG.109833.1	MSTRG.28249.1	MSTRG.72498.2	MSTRG.72498.1	MSTRG.82412.2	MSTRG.82412.1	MSTRG.40766.1	MSTRG.63425.1	MSTRG.90795.1
	novel5_mature	3	MSTRG.48007.1	MSTRG.22273.1	MSTRG.7604.1
	novel68_mature	1	MSTRG.125741.1
[truncated: 261 more columns]

## Sheet: Table S8
Table S8 Annotation information of identified miRNA mRNA pairs.
Comparison Group	Differentially Expressed miRNA	Target Gene	gene_symbol	description	GO_id	GO_term	pathway	pathway_description
SP_S2-vs-FP_S2	novel17_star	MSTRG.29638.3		uncharacterized protein LOC110692538 [Chenopodium quinoa]
	novel17_star	MSTRG.45166.2	NAT7	nucleobase-ascorbate transporter 7 [Sesamum indicum]	GO:0016021,GO:0005886,GO:0009506,GO:0022857	integral component of membrane|plasma membrane|plasmodesma|transmembrane transporter activity
	novel17_star	MSTRG.28322.1	GSO1	Serine/threonine protein kinase [Handroanthus impetiginosus]
	gma-miR168b	MSTRG.59672.5	NUDT23	PREDICTED: nudix hydrolase 23, chloroplastic isoform X2 [Nicotiana sylvestris]	GO:0009507,GO:0047631,GO:0047884,GO:0046872,GO:0042726,GO:0009416	chloroplast|ADP-ribose diphosphatase activity|FAD diphosphatase activity|metal ion binding|flavin-containing compound metabolic process|response to light stimulus	ko00230,ko00740	Purine metabolism|Riboflavin metabolism
	gma-miR168b	MSTRG.89501.9	NUDT23	nudix hydrolase 23, chloroplastic isoform X1 [Carica papaya]	GO:0009507,GO:0047631,GO:0047884,GO:0046872,GO:0042726,GO:0009416	chloroplast|ADP-ribose diphosphatase activity|FAD diphosphatase activity|metal ion binding|flavin-containing compound metabolic process|response to light stimulus	ko00230,ko00740	Purine metabolism|Riboflavin metabolism
	gma-miR168b	MSTRG.59672.11	NUDT23	PREDICTED: nudix hydrolase 23, chloroplastic isoform X2 [Nicotiana sylvestris]	GO:0009507,GO:0047631,GO:0047884,GO:0046872,GO:0042726,GO:0009416	chloroplast|ADP-ribose diphosphatase activity|FAD diphosphatase activity|metal ion binding|flavin-containing compound metabolic process|response to light stimulus	ko00230,ko00740	Purine metabolism|Riboflavin metabolism
	osa-miR397b	MSTRG.32542.1		protein ALP1-like [Sesamum indicum]
	bdi-miR5174e-3p.2	MSTRG.26430.1	UGT86A1	UDP-glycosyltransferase 86A1-like [Sesamum indicum]	GO:0043231,GO:0080043,GO:0080044,GO:0008194	intracellular membrane-bounded organelle|quercetin 3-O-glucosyltransferase activity|quercetin 7-O-glucosyltransferase activity|UDP-glycosyltransferase activity
	aly-miR172e-3p	MSTRG.38549.4	AP2-1	PREDICTED: floral homeotic protein APETALA 2 isoform X1 [Erythranthe guttata]
	aly-miR172e-3p	MSTRG.11017.6	At4g27290	hypothetical protein MIMGU_mgv1a020014mg [Erythranthe guttata]
	aly-miR172e-3p	MSTRG.48917.24	At4g27290	hypothetical protein MIMGU_mgv1a020014mg [Erythranthe guttata]
	aly-miR172e-3p	MSTRG.48917.12	At4g27290	hypothetical protein MIMGU_mgv1a020014mg [Erythranthe guttata]
	aly-miR172e-3p	MSTRG.16486.4		PREDICTED: uncharacterized protein LOC109179592 [Ipomoea nil]
	aly-miR172e-3p	MSTRG.79214.4	BRN2	CUGBP Elav-like family member 5-like [Dorcoceras hygrometricum]	GO:0005737,GO:0005634,GO:1990904,GO:0003729,GO:0003723,GO:0009908,GO:0006402,GO:0048573,GO:2000028	cytoplasm|nucleus|ribonucleoprotein complex|mRNA binding|RNA binding|flower development|mRNA catabolic process|photoperiodism, flowering|regulation of photoperiodism, flowering
SP_S3-vs-FP_S3	pta-miR319	MSTRG.77217.14	UNE12	hypothetical protein Saspl_043021 [Salvia splendens]	GO:0005634,GO:0003677,GO:0001228,GO:0003700,GO:0046983,GO:0009567,GO:0007275,GO:0031347,GO:0006355	nucleus|DNA binding|DNA-binding transcription activator activity, RNA polymerase II-specific|DNA-binding transcription factor activity|protein dimerization activity|double fertilization forming a zygote and endosperm|multicellular organism development|regulation of defense response|regulation of transcription, DNA-templated
	pta-miR319	MSTRG.32811.2	UNE12	transcription factor UNE12 isoform X2 [Sesamum indicum]	GO:0005634,GO:0003677,GO:0001228,GO:0003700,GO:0046983,GO:0009567,GO:0007275,GO:0031347,GO:0006355	nucleus|DNA binding|DNA-binding transcription activator activity, RNA polymerase II-specific|DNA-binding transcription factor activity|protein dimerization activity|double fertilization forming a zygote and endosperm|multicellular organism development|regulation of defense response|regulation of transcription, DNA-templated
	pta-miR319	MSTRG.83957.6	CAT1	DNA topoisomerase 6 subunit A [Sesamum indicum]	GO:0016021,GO:0016020,GO:0005886,GO:0005313,GO:0015189,GO:0051938	integral component of membrane|membrane|plasma membrane|L-glutamate transmembrane transporter activity|L-lysine transmembrane transporter activity|L-glutamate import
	gma-miR159e-5p	MSTRG.106111.4	At1g60070	Vesicle coat complex AP-1, gamma subunit [Handroanthus impetiginosus]	GO:0030121,GO:0006886,GO:0016192	AP-1 adaptor complex|intracellular protein transport|vesicle-mediated transport
	gma-miR159e-5p	MSTRG.97546.3	PHOX1	PREDICTED: uncharacterized protein LOC105977156 [Erythranthe guttata]	GO:0030659	cytoplasmic vesicle membrane
	csi-miR156e-5p	MSTRG.94705.2	FLA17	fasciclin-like arabinogalactan protein 17 [Sesamum indicum]	GO:0005576,GO:0005773	extracellular region|vacuole
	csi-miR156e-5p	MSTRG.85309.2	POPA	PREDICTED: prolyl endopeptidase-like [Erythranthe guttata]	GO:0004252,GO:0070008	serine-type endopeptidase activity|serine-type exopeptidase activity
	csi-miR156e-5p	MSTRG.111696.3	SPL3	squamosa promoter-binding-like protein 12 [Sesamum indicum]	GO:0005634,GO:0003677,GO:0046872	nucleus|DNA binding|metal ion binding
	csi-miR156e-5p	MSTRG.94328.2	ABC1K8	uncharacterized protein LOC105165093 [Sesamum indicum]	GO:0009507,GO:0009941,GO:0031969,GO:0016021,GO:0005524,GO:0016301,GO:0005215,GO:0034599,GO:0007623,GO:0055072,GO:0010150,GO:0046467,GO:1901031,GO:0046686,GO:0009644,GO:0042542,GO:1990641,GO:0006979	chloroplast|chloroplast envelope|chloroplast membrane|integral component of membrane|ATP binding|kinase activity|transporter activity|cellular response to oxidative stress|circadian rhythm|iron ion homeostasis|leaf senescence|membrane lipid biosynthetic process|regulation of response to reactive oxygen species|response to cadmium ion|response to high light intensity|response to hydrogen peroxide|…
	aly-miR158b-3p	MSTRG.93236.2	cwf11	intron-binding protein aquarius [Sesamum indicum]	GO:0071013,GO:0005634,GO:0071014,GO:0005681,GO:0005684,GO:0003729,GO:0045292	catalytic step 2 spliceosome|nucleus|post-mRNA release spliceosomal complex|spliceosomal complex|U2-type spliceosomal complex|mRNA binding|mRNA cis splicing, via spliceosome	ko03040	Spliceosome
	aly-miR158b-3p	MSTRG.61545.5	PEX1	peroxisome biogenesis protein 1 isoform X1 [Sesamum indicum]	GO:0005829,GO:0005778,GO:0005524,GO:0016887,GO:0042623,GO:0006635,GO:0007031,GO:0016558	cytosol|peroxisomal membrane|ATP binding|ATPase activity|ATPase activity, coupled|fatty acid beta-oxidation|peroxisome organization|protein import into peroxisome matrix	ko04146	Peroxisome
	aly-miR158b-3p	MSTRG.72432.5	At5g64460	hypothetical protein MIMGU_mgv1a009145mg [Erythranthe guttata]	GO:0005829	cytosol
	ama-miR156	MSTRG.111696.3	SPL3	squamosa promoter-binding-like protein 12 [Sesamum indicum]	GO:0005634,GO:0003677,GO:0046872	nucleus|DNA binding|metal ion binding
	bdi-miR159a-3p	MSTRG.41326.5	AP2-1	ethylene-responsive transcription factor RAP2-7 isoform X1 [Sesamum indicum]
	bdi-miR159a-3p	MSTRG.18169.4	CIPK23	CBL-interacting protein kinase 23 [Sesamum indicum]	GO:0005737,GO:0005829,GO:0005634,GO:0005886,GO:0009536,GO:0005524,GO:0005267,GO:0004674,GO:0035556,GO:0010107,GO:0006468,GO:0007584,GO:0009414,GO:0010118	cytoplasm|cytosol|nucleus|plasma membrane|plastid|ATP binding|potassium channel activity|protein serine/threonine kinase activity|intracellular signal transduction|potassium ion import|protein phosphorylation|response to nutrient|response to water deprivation|stomatal movement
	bdi-miR159a-3p	MSTRG.77217.14	UNE12	hypothetical protein Saspl_043021 [Salvia splendens]	GO:0005634,GO:0003677,GO:0001228,GO:0003700,GO:0046983,GO:0009567,GO:0007275,GO:0031347,GO:0006355	nucleus|DNA binding|DNA-binding transcription activator activity, RNA polymerase II-specific|DNA-binding transcription factor activity|protein dimerization activity|double fertilization forming a zygote and endosperm|multicellular organism development|regulation of defense response|regulation of transcription, DNA-templated
	bdi-miR159a-3p	MSTRG.32811.2	UNE12	transcription factor UNE12 isoform X2 [Sesamum indicum]	GO:0005634,GO:0003677,GO:0001228,GO:0003700,GO:0046983,GO:0009567,GO:0007275,GO:0031347,GO:0006355	nucleus|DNA binding|DNA-binding transcription activator activity, RNA polymerase II-specific|DNA-binding transcription factor activity|protein dimerization activity|double fertilization forming a zygote and endosperm|multicellular organism development|regulation of defense response|regulation of transcription, DNA-templated
	gma-miR159a-5p	MSTRG.44129.1	At1g60070	Vesicle coat complex AP-1, gamma subunit [Handroanthus impetiginosus]	GO:0030121,GO:0006886,GO:0016192	AP-1 adaptor complex|intracellular protein transport|vesicle-mediated transport
	gma-miR159a-5p	MSTRG.119803.1	SPBC1271.03c	uncharacterized protein LOC105177531 [Sesamum indicum]	GO:0005829,GO:0005730,GO:0005634,GO:0005886,GO:0004721,GO:0023052	cytosol|nucleolus|nucleus|plasma membrane|phosphoprotein phosphatase activity|signaling
	novel17_mature	MSTRG.83027.3	RPP13L3	Apoptotic ATPase [Handroanthus impetiginosus]
	ath-miR161.1	MSTRG.9705.4	vps13b	PREDICTED: uncharacterized protein LOC105972403 isoform X1 [Erythranthe guttata]	GO:0005768,GO:0019898,GO:0005794,GO:0006886,GO:0045324,GO:0045053,GO:0006623	endosome|extrinsic component of membrane|Golgi apparatus|intracellular protein transport|late endosome to vacuole transport|protein retention in Golgi apparatus|protein targeting to vacuole
	gma-miR172k	MSTRG.41326.5	AP2-1	ethylene-responsive transcription factor RAP2-7 isoform X1 [Sesamum indicum]
	gma-miR172k	MSTRG.115090.1	AP2	hypothetical protein CDL12_28586 [Handroanthus impetiginosus]	GO:0005634,GO:0003677,GO:0003700,GO:0030154,GO:0009908,GO:0010073,GO:0048481,GO:0048316,GO:0010093	nucleus|DNA binding|DNA-binding transcription factor activity|cell differentiation|flower development|meristem maintenance|plant ovule development|seed development|specification of floral organ identity
	gma-miR172k	MSTRG.23467.1	At4g27290	S-locus lectin protein kinase family protein [Striga asiatica]
	gma-miR172k	MSTRG.45075.2	At4g27290	hypothetical protein MIMGU_mgv1a020014mg [Erythranthe guttata]
	gma-miR172k	MSTRG.45055.2	At4g27290	G-type lectin S-receptor-like serine/threonine-protein kinase At4g27290 isoform X1 [Olea europaea var. sylvestris]
	gma-miR172k	MSTRG.90185.1	At4g27290	G-type lectin S-receptor-like serine/threonine-protein kinase At4g27290 [Sesamum indicum]
SP_S4-vs-FP_S4	gma-miR408d	MSTRG.47124.1		basic blue protein-like [Olea europaea var. sylvestris]	GO:0009055,GO:0046872	electron transfer activity|metal ion binding
	gma-miR408d	MSTRG.31298.5	PAA2	copper-transporting ATPase PAA2, chloroplastic [Sesamum indicum]	GO:0009535,GO:0016021,GO:0005524,GO:0005375,GO:0004008,GO:0046872,GO:0006825	chloroplast thylakoid membrane|integral component of membrane|ATP binding|copper ion transmembrane transporter activity|copper-exporting ATPase activity|metal ion binding|copper ion transport	ko04016	MAPK signaling pathway - plant
	novel5_mature	MSTRG.7604.1	RE2	Seven transmembrane MLO family protein [Prunus dulcis]	GO:0000943,GO:0004190,GO:0004519,GO:0046872,GO:0003676,GO:0003964,GO:0015074,GO:0006310	retrotransposon nucleocapsid|aspartic-type endopeptidase activity|endonuclease activity|metal ion binding|nucleic acid binding|RNA-directed DNA polymerase activity|DNA integration|DNA recombination
	osa-miR159f	MSTRG.97625.2	GAMYB	MYB-related transcription factor [Salvia miltiorrhiza]	GO:0005634,GO:0043565,GO:0044212,GO:0048653,GO:0030154,GO:0009555,GO:0006355	nucleus|sequence-specific DNA binding|transcription regulatory region DNA binding|anther development|cell differentiation|pollen development|regulation of transcription, DNA-templated
	osa-miR159f	MSTRG.97625.1	GAMYB	MYB-related transcription factor [Salvia miltiorrhiza]	GO:0005634,GO:0043565,GO:0044212,GO:0048653,GO:0030154,GO:0009555,GO:0006355	nucleus|sequence-specific DNA binding|transcription regulatory region DNA binding|anther development|cell differentiation|pollen development|regulation of transcription, DNA-templated
	osa-miR159f	MSTRG.24947.1	At5g10770	aspartyl protease family protein At5g10770-like [Sesamum indicum]	GO:0031225,GO:0005886,GO:0004190,GO:0030163,GO:0006508	anchored component of membrane|plasma membrane|aspartic-type endopeptidase activity|protein catabolic process|proteolysis
